# Supplementary material for: Rhodium(iii)-catalyzed diamidation of olefins via amidorhodation and further amidation
Source: Royal Society of Chemistry journal article supplement (doi:10.1039/d0cc00952k), 2020-01-01

## ***Electronic Supporting Information***

### **Rh(III)-Catalyzed Diamidation of Olefins via Amidorhodation and Further Amidation**

Jinlei Wang, Guangfan Zheng, Xingwei Li\*

*School of Chemistry and Chemical Engineering, Shaanxi Normal University, Xi'an 710062,  
China*

### **Contents**

|                                                              |           |
|--------------------------------------------------------------|-----------|
| Table of Contents.....                                       | S1        |
| 1. General Considerations.....                               | S2        |
| 2. Synthesis and Characterization of starting materials..... | S2 – S7   |
| 3. General procedure for the catalysis.....                  | S8 – S11  |
| 4. Mechanistic studies.....                                  | S11 – S12 |
| 5. NMR Analytical data for new compounds.....                | S12 – S26 |
| 6. X-Ray Crystallographic Data.....                          | S27 – S27 |
| 7. References.....                                           | S28 – S28 |
| 8. NMR Spectral for new compounds.....                       | S29 – S78 |

## 1. General Considerations

All the reactions were carried out using standard Schlenk technique. The  $^1\text{H}$  NMR spectra were recorded on a 400 MHz or 600 MHz NMR spectrometer. The  $^{13}\text{C}$  NMR spectra were recorded at 100 MHz or 150 MHz. The residual solvent signals were used as references and the chemical shifts were converted to the TMS scale ( $\text{CDCl}_3$ :  $\delta \text{H} = 7.26$  ppm,  $\delta \text{C} = 77.16$  ppm). The chemical shifts were reported as s (singlet), d (doublet), t (triplet), dd (doublets of doublet), dt (doublets of triplet), and m (multiplet). The coupling constants  $J$  were given in Hz. HRMS data were obtained using a ESI mode. The conversion of starting materials was monitored by thin layer chromatography (TLC) using silica gel plates (silica gel 60 F254 0.25 mm), and components were visualized under UV light (254 and 365 nm). Column chromatography was performed on silica gel 200-300 mesh. Unless otherwise noted below, all other compounds have been reported in the literature or are commercially available. Commercial reagents were used without further purification.

## 2. Synthesis and Characterization of starting materials

### a. Method A: Preparation of the Substrates 1 (Synthesis of 1a is representative)

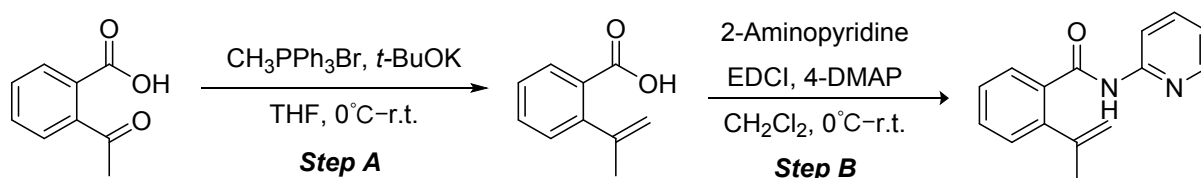

**Step A.**<sup>1</sup> To a stirred suspension of methyltriphenylphosphonium bromide (3.0 equiv) in THF (1.0 M), potassium *tert*-butoxide (3.0 equiv) was added at  $0^\circ\text{C}$  and stirred for 0.5 hour under Ar. A solution of 2-ketobenzoic acid (1.0 equiv) in THF (3 M) was added dropwise. Until the reaction was completed, as monitored by TLC, the resulting mixture was quenched with water, basified with aqueous NaOH (3.0 M) and washed with diethyl ether. The resulting aqueous phase was acidified with aqueous HCl (2.0 M) until pH 1-2 and extracted twice with ethyl acetate. The combined organic layers were washed with water, brine, dried over with  $\text{Na}_2\text{SO}_4$ , filtered and concentrated in vacuo. The resulting crude product was purified by flash column chromatography to afford the desired unsaturated benzoic acid derivatives.

**Step B.**<sup>2</sup> To a solution of unsaturated benzoic acid derivative (1.0 equiv) in anhydrous DCM (0.25 M) were added 2-aminopyridine (1.1 equiv), *N,N*-dimethyl-4-aminopyridine (DMAP, 0.1 equiv) at 0°C. Then 1-(3-dimethylaminopropyl)-3-ethylcarbodiimide hydrochloride (EDCI, 1.2 equiv) in DCM (20 mL) was dropwise added to the solution under an argon atmosphere. After the addition, the reaction was then warmed to room temperature, stirred for 10 hours and quenched with water (30 mL). The reaction mixture was extracted with DCM (3 × 20 mL) and the combined organic solvent was dried over Na<sub>2</sub>SO<sub>4</sub>, filtered and concentrated under reduced pressure. The resulting residue was purified by column chromatography to give pure **1a** as a white solid.

**b. Method B: Preparation of the Substrate 1j and 1k.**<sup>3</sup>

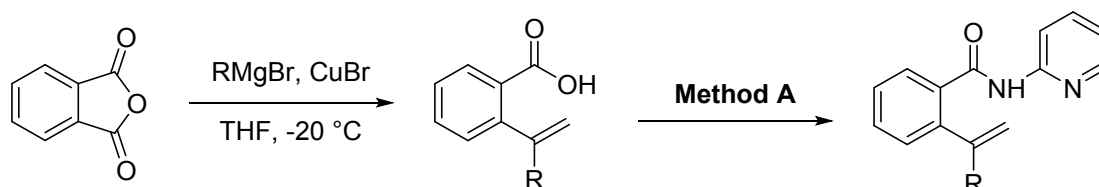

Phthalicacidanhydrid (1.0 equiv), copper bromide (5 mmol%) and anhydrous THF were added to a flame-dried flask and cooled to -20 °C under N<sub>2</sub> atmosphere. RMgBr (1.1 equiv) was added dropwise to the mixture over 1 h. The reaction mixture was stirred overnight at -20 °C, then allowed to warm to room temperature, quenched with water, basified with aqueous NaOH (3.0 M) until pH = 12-14 and washed with diethyl ether. The resulting aqueous phase was acidified with aqueous HCl (2.0 M) until pH 1-2 and extracted twice with ethyl acetate. The combined organic layers were washed with water, brine, dried over Na<sub>2</sub>SO<sub>4</sub>, filtered and concentrated in vacuo. The crude product was dissolved in DCM and the solid was filtered off. The crude benzoic acid derivative was used for the next step without further purification. From benzoic acid derivative, the corresponding benzamide derivate was synthesized by the same **method A**.

**c. Method C: Preparation of the Substrate 1m.**

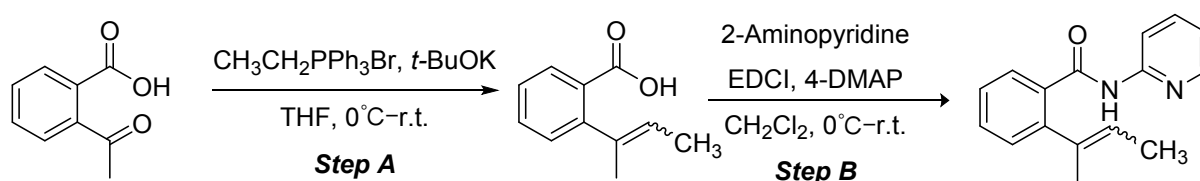

#### d. Preparation of the Substrate 2.<sup>4</sup>

To a solution of hydroxamic acid derivatives (5.0 mmol) in anhydrous DCM (50 mL), 1,1'-carbonyldiimidazole (CDI) (0.85 g, 5.25 mmol) was added slowly at room temperature and stirred for 30 min. The reaction mixture was quenched with 1 N HCl (30 mL) and extracted with anhydrous DCM (50 mL) for 3 times. The combined organic layer was evaporated under reduced pressure and purified by flash column chromatography on a silica gel column by using hexane/ethylacetate eluent to afford 3- substituted-1,4,2-dioxazol-5-one derivatives **2**. The compound **2** decomposes in column on performing the column chromatography over a prolonged time period (> 20 min).

#### c. Characterization of Starting Substrates 1

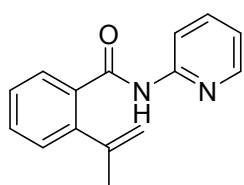

**2-(prop-1-en-2-yl)-N-(pyridin-2-yl)benzamide (1a)**. white solid. <sup>1</sup>H NMR (600 MHz, CDCl<sub>3</sub>) δ 9.73 (s, 1H), 8.37 (d, *J* = 8.4 Hz, 1H), 7.72 – 7.62 (m, 2H), 7.60 – 7.54 (m, 1H), 7.46 – 7.43 (m, 1H), 7.36 – 7.34 (m, 1H), 7.27 (d, *J* = 7.7 Hz, 1H), 6.89 – 6.87 (m, 1H), 5.23 (s, 1H), 5.05 (s, 1H), 2.06 (s, 3H). <sup>13</sup>C NMR (150 MHz, CDCl<sub>3</sub>) δ 168.3, 151.9, 147.6, 145.0, 142.1, 138.4, 134.5, 130.6, 129.0, 128.3, 127.5, 119.6, 116.5, 114.1, 23.9. HRMS (ESI): *m/z*: [M + Na]<sup>+</sup> calculated for C<sub>15</sub>H<sub>14</sub>N<sub>2</sub>NaO: 261.0998, found: 221.1006.

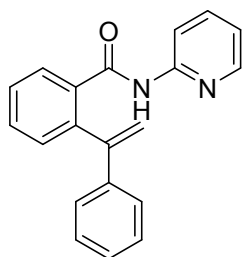

**2-(1-phenylvinyl)-N-(pyridin-2-yl)benzamide (1b)**. white solid. <sup>1</sup>H NMR (600 MHz, CDCl<sub>3</sub>) δ 8.84 (s, 1H), 7.97 – 7.84 (m, 2H), 7.71 (d, *J* = 6.8 Hz, 1H), 7.56 – 7.53 (m, 2H), 7.49 – 7.39 (m, 2H), 7.20 – 7.10 (m, 5H), 6.93 – 6.86 (m, 1H), 5.75 (s, 1H), 5.43 (s, 1H). <sup>13</sup>C NMR (150 MHz, CDCl<sub>3</sub>) δ 167.3, 151.4, 149.2, 147.5, 140.2, 138.1, 135.6, 131.0, 130.9, 128.7, 128.3, 128.1, 128.1, 128.0, 127.1, 119.6, 116.4, 113.8. HRMS (ESI): *m/z*: [M + Na]<sup>+</sup> calculated for C<sub>20</sub>H<sub>16</sub>N<sub>2</sub>NaO: 323.1155, found: 323.1152.

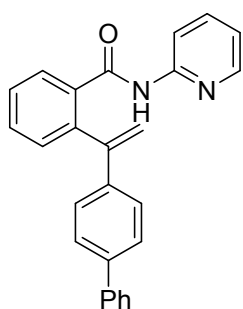

**2-(1-([1,1'-biphenyl]-4-yl)vinyl)-N-(pyridin-2-yl)benzamide (1c)**. off white solid. <sup>1</sup>H NMR (600 MHz, CDCl<sub>3</sub>) δ 9.13 (s, 1H), 7.90 (d, *J* = 8.4 Hz, 1H), 7.75 (d, *J* = 4.9 Hz, 1H), 7.70 (d, *J* = 7.6 Hz, 1H), 7.53 – 7.43 (m, 2H), 7.44 (t, *J* = 7.4 Hz, 4H), 7.38 – 7.33 (m, 4H), 7.28 (t, *J* = 7.3 Hz, 1H), 7.24 (d, *J* = 7.9 Hz, 2H), 6.83 (t, *J* = 6.1 Hz, 1H), 5.77 (s, 1H), 5.40

(s, 1H).  $^{13}\text{C}$  NMR (150 MHz,  $\text{CDCl}_3$ )  $\delta$  167.5, 151.6, 148.7, 147.5, 140.7, 140.6, 140.2, 139.2, 138.1, 135.8, 131.0, 130.9, 128.7, 128.6, 128.3, 127.6, 127.3, 127.0, 126.9, 119.6, 116.4, 113.9.

HRMS (ESI):  $m/z$ :  $[\text{M} + \text{Na}]^+$  calculated for  $\text{C}_{26}\text{H}_{20}\text{N}_2\text{NaO}$ : 399.1468, found: 399.1466.

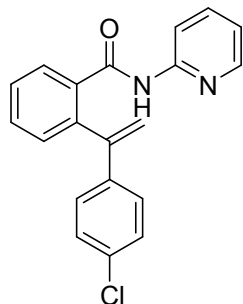

**2-(1-(4-chlorophenyl)vinyl)-N-(pyridin-2-yl)benzamide (1d).** yellow

solid.  $^1\text{H}$  NMR (600 MHz,  $\text{CDCl}_3$ )  $\delta$  9.13 (s, 1H), 7.92 (d,  $J = 8.4$  Hz, 1H), 7.75 (d,  $J = 3.3$  Hz, 1H), 7.69 (d,  $J = 7.6$  Hz, 1H), 7.58 – 7.55 (m, 1H), 7.53 – 7.51 (m, 1H), 7.46 – 7.43 (m, 1H), 7.39 (d,  $J = 8.2$  Hz, 1H), 7.11 – 7.04 (m, 4H), 6.90 – 6.85 (m, 1H), 5.68 (s, 1H), 5.38 (s, 1H).

$^{13}\text{C}$  NMR (150 MHz,  $\text{CDCl}_3$ )  $\delta$  167.3, 151.5, 148.1, 147.5, 139.8, 138.8,

138.2, 135.7, 133.8, 130.9, 129.0, 128.5, 128.5, 128.3, 128.2, 119.7, 116.8, 113.8. HRMS (ESI):

$m/z$ :  $[\text{M} + \text{Na}]^+$   $\text{C}_{20}\text{H}_{15}\text{ClN}_2\text{NaO}$ : 357.0765, found: 357.0763.

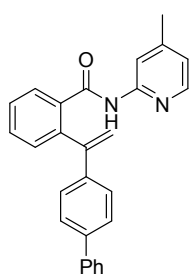

**2-(1-([1,1'-biphenyl]-4-yl)vinyl)-N-(4-methylpyridin-2-yl)benzamide**

**(1e).** white solid.  $^1\text{H}$  NMR (600 MHz,  $\text{CDCl}_3$ )  $\delta$  8.61 – 8.51 (m, 1H), 7.92 – 7.89 (m, 1H), 7.77 – 7.70 (m, 2H), 7.56 – 7.53 (m, 1H), 7.49 – 7.44 (m, 4H), 7.40 – 7.35 (m, 4H), 7.29 – 7.23 (m, 3H), 6.75 (d,  $J = 5.0$  Hz, 1H), 5.83 (s, 1H), 5.47 (s, 1H), 2.20 (s, 3H).  $^{13}\text{C}$  NMR (150 MHz,  $\text{CDCl}_3$ )  $\delta$  167.1, 151.3,

149.5, 148.7, 147.2, 140.7, 140.5, 140.1, 139.1, 135.6, 131.0, 131.0, 128.7, 128.4, 128.0, 127.5,

127.3, 126.9, 126.8, 120.9, 116.4, 114.2, 21.2. HRMS (ESI):  $m/z$ :  $[\text{M} + \text{Na}]^+$   $\text{C}_{27}\text{H}_{22}\text{N}_2\text{NaO}$ :

413.1624, found: 413.1625.

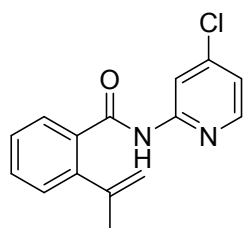

**N-(4-chloropyridin-2-yl)-2-(prop-1-en-2-yl)benzamide (1f).** white

solid.  $^1\text{H}$  NMR (600 MHz,  $\text{CDCl}_3$ )  $\delta$  9.36 (s, 1H), 8.47 (s, 1H), 7.71 – 7.64 (m, 2H), 7.49 – 7.46 (m, 1H), 7.39 – 7.37 (m, 1H), 7.29 (d,  $J = 7.6$  Hz, 1H), 6.96-6.94 (m, 1H), 5.28 (s, 1H), 5.09 (s, 1H), 2.08 (s, 3H).  $^{13}\text{C}$  NMR

(150 MHz,  $\text{CDCl}_3$ )  $\delta$  168, 152.6, 148.4, 146, 145.1, 142.2, 133.7, 131.0,

129.1, 128.5, 127.6, 120.2, 116.7, 114.2, 24.1. HRMS (ESI):  $m/z$ :  $[\text{M} + \text{Na}]^+$   $\text{C}_{15}\text{H}_{13}\text{ClN}_2\text{NaO}$ :

295.0609, found: 295.0609.

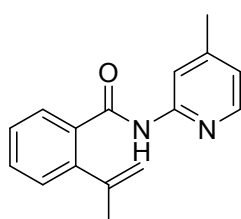

**N-(4-methylpyridin-2-yl)-2-(prop-1-en-2-yl)benzamide (1g).** white

solid.  $^1\text{H}$  NMR (600 MHz,  $\text{CDCl}_3$ )  $\delta$  10.78 (s, 1H), 8.26 (s, 1H), 7.63 – 7.50 (m, 1H), 7.42 – 7.39 (m, 1H), 7.35 – 7.20 (m, 2H), 6.94 – 6.81 (m,

1H), 6.56 (s, 1H), 5.16 (s, 1H), 4.95 (s, 1H), 2.30 (s, 3H), 2.03 (s, 3H). <sup>13</sup>C NMR (150 MHz, CDCl<sub>3</sub>) δ 169.0, 152.3, 149.8, 146.8, 144.4, 142.0, 135.4, 130.1, 128.71, 128.0, 127.3, 120.6, 116.1, 114.7, 23.7, 21.3. HRMS (ESI): m/z: [M + Na]<sup>+</sup> C<sub>16</sub>H<sub>16</sub>N<sub>2</sub>NaO: 275.1155, found: 275.1153.

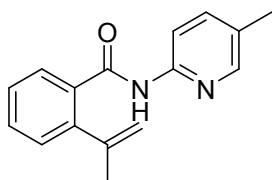

**N-(5-methylpyridin-2-yl)-2-(prop-1-en-2-yl)benzamide (1h).** white solid. <sup>1</sup>H NMR (600 MHz, CDCl<sub>3</sub>) δ 10.43 (s, 1H), 8.28 (d, *J* = 8.0 Hz, 1H), 7.60 (d, *J* = 7.9 Hz, 1H), 7.51 – 7.39 (m, 2H), 7.40 – 7.30 (m, 1H), 7.26 (t, *J* = 7.1 Hz, 1H), 6.86 (s, 1H), 5.15 (s, 1H), 4.93 (s, 1H), 2.07 (s, 3H), 2.00 (s, 3H). <sup>13</sup>C NMR (150 MHz, CDCl<sub>3</sub>) δ 168.7, 150.1, 147.3, 144.5, 142.1, 138.9, 135.4, 130.1, 128.7, 128.7, 128.1, 127.3, 116.2, 113.7, 23.7, 17.7. HRMS (ESI): m/z: [M + Na]<sup>+</sup> C<sub>16</sub>H<sub>16</sub>N<sub>2</sub>NaO: 275.1155, found: 275.1156.

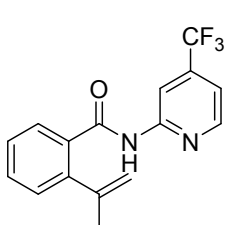

**2-(prop-1-en-2-yl)-N-(4-(trifluoromethyl)pyridin-2-yl)benzamide (1i).** white solid. <sup>1</sup>H NMR (600 MHz, CDCl<sub>3</sub>) δ 9.77 (s, 1H), 8.69 (s, 1H), 7.75 – 7.64 (m, 2H), 7.50 – 7.47 (m, 1H), 7.40 – 7.37 (m, 1H), 7.30 (d, *J* = 7.7 Hz, 1H), 7.12 (d, *J* = 4.9 Hz, 1H), 5.27 (s, 1H), 5.07 (s, 1H), 2.07 (s, 3H). <sup>13</sup>C NMR (150 MHz, CDCl<sub>3</sub>) δ 168.3, 152.7, 148.7, 144.9, 142.3, 140.6 (q, *J* = 33.9 Hz), 133.8, 131.1, 129.1, 128.5, 127.7, 122.7 (q, *J* = 273.5 Hz), 116.7, 115.3 (q, *J* = 3.4 Hz), 110.1 (q, *J* = 3.9 Hz), 24.0. HRMS (ESI): m/z: [M + Na]<sup>+</sup> C<sub>16</sub>H<sub>13</sub>F<sub>3</sub>N<sub>2</sub>NaO: 329.0872, found: 329.0873.

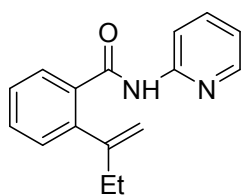

**2-(but-1-en-2-yl)-N-(pyridin-2-yl)benzamide (1j).** white solid. <sup>1</sup>H NMR (600 MHz, CDCl<sub>3</sub>) δ 9.60 – 8.89 (m, 1H), 8.35 (d, *J* = 8.4 Hz, 1H), 7.98 – 7.83 (m, 1H), 7.77 – 7.64 (m, 2H), 7.46 – 7.43 (m, 1H), 7.38 – 7.36 (m, 1H), 7.30 – 7.20 (m, 1H), 7.06 – 6.88 (m, 1H), 5.49 – 5.14 (m, 1H), 5.15 – 5.13 (m, 1H), 2.41 – 2.37 (m, 2H). <sup>13</sup>C NMR (150 MHz, CDCl<sub>3</sub>) δ 167.8, 151.8, 151.5, 147.8, 141.8, 138.3, 134.2, 130.7, 129.6, 128.6, 127.5, 119.7, 114.5, 114.0, 30.6, 12.6. HRMS (ESI): m/z: [M + Na]<sup>+</sup> C<sub>16</sub>H<sub>16</sub>N<sub>2</sub>NaO: 275.1155, found: 275.1152.

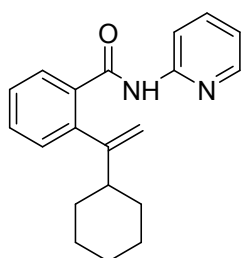

**2-(1-cyclohexylvinyl)-N-(pyridin-2-yl)benzamide (1k).** white solid. <sup>1</sup>H NMR (400 MHz, CDCl<sub>3</sub>) δ 8.77 (s, 1H), 8.32 (d, *J* = 8.4 Hz, 1H), 8.22 – 8.21 (m, 1H), 7.83 – 7.81 (m, 1H), 7.75 – 7.64 (m, 1H), 7.48 – 7.34 (m, 2H), 7.19 (dd, *J* = 7.4, 1.4 Hz, 1H), 7.03 – 7.00 (m, 1H), 5.32 – 5.31 (m, 1H), 5.20 (s, 1H), 2.17 – 2.10 (m, 1H), 1.78 – 1.74 (m, 2H), 1.66 – 1.65

(m, 2H), 1.61 – 1.59 (m, 1H), 1.15 – 1.08 (m, 5H).  $^{13}\text{C}$  NMR (100MHz,  $\text{CDCl}_3$ )  $\delta$  167.4, 156.2, 151.6, 148.1, 142.1, 138.4, 133.4, 130.9, 130.4, 129.3, 127.7, 119.9, 113.9, 113.6, 45.3, 32.2, 26.6, 26.2. HRMS (ESI):  $m/z$ :  $m/z$ :  $[\text{M} + \text{Na}]^+$   $\text{C}_{20}\text{H}_{22}\text{N}_2\text{NaO}$ : 329.1624, found: 392.1624.

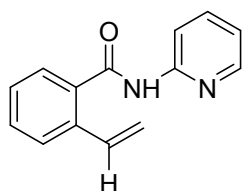

**N-(pyridin-2-yl)-2-vinylbenzamide (1l).** white solid.  $^1\text{H}$  NMR (400 MHz,  $\text{CDCl}_3$ )  $\delta$  9.30 (s, 1H), 8.37 (d,  $J = 8.4$  Hz, 1H), 7.78 (s, 1H), 7.73 – 7.67 (m, 1H), 7.59 – 7.55 (m, 2H), 7.46 – 7.42 (m, 1H), 7.33 – 7.29 (m, 1H), 7.09 (dd,  $J = 17.4, 11.0$  Hz, 1H), 6.95 – 6.92 (m, 1H), 5.70 (dd,  $J = 17.4, 0.8$  Hz, 1H), 5.37 (dd,  $J = 11.0, 0.9$  Hz, 1H).  $^{13}\text{C}$  NMR (100MHz,  $\text{CDCl}_3$ )  $\delta$  168.1, 151.7, 147.7, 138.5, 136.4, 135.1, 134.2, 130.8, 127.9, 127.6, 126.7, 119.9, 117.4, 114.3. HRMS (ESI):  $m/z$ :  $m/z$ :  $[\text{M} + \text{Na}]^+$   $\text{C}_{14}\text{H}_{12}\text{N}_2\text{NaO}$ : 247.0842, found: 247.0844.

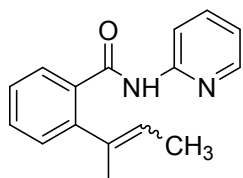

**2-(but-2-en-2-yl)-N-(pyridin-2-yl)benzamide (1m).** white solid ( $E:Z = 3:1$ ).  $^1\text{H}$  NMR (600 MHz,  $\text{CDCl}_3$ )  $\delta$  9.19 (s, 1H), 8.36 (d,  $J = 8.3$  Hz, 1H), 8.07 – 8.06 (m, 1H), 7.89 (dd,  $J = 7.8, 1.4$  Hz, 1H), 7.72 – 7.68 (m,  $J = 8$  1H), 7.49 – 7.46 (m, 1H), 7.38 – 7.36 (m, 1H), 7.16 – 7.15 (m, 1H), 6.99 – 6.97 (m, 1H), 5.78 (dddd,  $J = 8.4, 6.9, 5.3, 1.6$  Hz, 1H), 2.09 – 2.00 (m, 3H), 1.55 – 1.54 (m, 3H).  $^{13}\text{C}$  NMR (150MHz,  $\text{CDCl}_3$ )  $\delta$  166.9, 151.9, 148.0, 140.5, 138.2, 136.9, 133.7, 131.2, 129.8, 129.2, 127.3, 124.5, 119.7, 114.1, 25.7, 14.9. HRMS (ESI):  $m/z$ :  $m/z$ :  $[\text{M} + \text{Na}]^+$   $\text{C}_{16}\text{H}_{16}\text{N}_2\text{NaO}$ : 275.1155, found: 275.1157.

### 3. General procedure for the catalysis

#### a. Table S1. Modification of the Directing Group.<sup>a</sup>

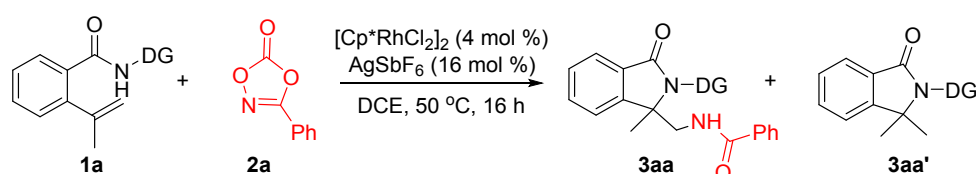

| Entry | DG   | additive             | <i>T</i> (°C) | Yield (%) <sup>b</sup> ( <b>3aa</b> / <b>3aa'</b> ) |
|-------|------|----------------------|---------------|-----------------------------------------------------|
| 1     | OMe  | PivOH                | 50            | -/74                                                |
| 2     | OMe  | AgOAc                | 50            | -/54                                                |
| 3     | OMe  | -                    | 50            | -/84                                                |
| 4     | NHPh | -                    | 100           | -/37                                                |
| 5     | NHPh | Zn(OAc) <sub>2</sub> | 100           | -/24                                                |
| 6     | 2-Py | PivOH                | 100           | 40/18                                               |
| 7     | 2-Py | Zn(OAc) <sub>2</sub> | 100           | 35/24                                               |
| 8     | 2-Py | -                    | 100           | 44/-                                                |

<sup>a</sup>Reaction conditions: **1a** (0.1 mmol), **2a** (0.2 mmol), [Cp\**RhCl*<sub>2</sub>]<sub>2</sub> (4 mol %), Acid (2.0 equiv), DCE (1.5 mL), *T* °C, 16 h under air in a sealed tube. <sup>b</sup>Yield was determined by <sup>1</sup>H NMR spectroscopy using 1,3,5-trimethoxybenzene as internal standard.

**Table S2. Optimization Studies on Rh-Catalyzed Amidation With Dioxazolones <sup>a</sup>.**

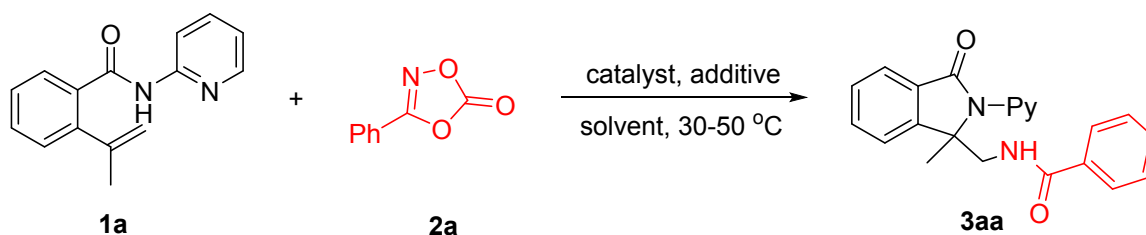

| entry | catalyst (mol%)                                                          | solvent          | <i>T</i> (°C) | yield (%) <sup>b</sup> |
|-------|--------------------------------------------------------------------------|------------------|---------------|------------------------|
| 1     | [Cp* <i>Rh</i> (MeCN) <sub>3</sub> ](SbF <sub>6</sub> ) <sub>2</sub> (8) | DCE <sup>d</sup> | 30            | -.                     |
| 2     | [Cp* <i>Rh</i> (MeCN) <sub>3</sub> ](SbF <sub>6</sub> ) <sub>2</sub> (8) | DCE <sup>d</sup> | 40            | -.                     |
| 3     | AgSbF <sub>6</sub> (16)                                                  | DCE <sup>d</sup> | 30            | -                      |
| 4     | [Cp* <i>RhCl</i> <sub>2</sub> ] <sub>2</sub> (4)                         | DCE <sup>d</sup> | 30            | -.                     |
| 5     | [Cp* <i>RhCl</i> <sub>2</sub> ] <sub>2</sub> (4)/AgSbF <sub>6</sub> (16) | DCE <sup>d</sup> | 30            | 47                     |
| 6     | [Cp* <i>RhCl</i> <sub>2</sub> ] <sub>2</sub> (4)/AgSbF <sub>6</sub> (16) | DCE              | 30            | 62                     |
| 7     | [Cp* <i>RhCl</i> <sub>2</sub> ] <sub>2</sub> (4)/AgSbF <sub>6</sub> (16) | DCE              | 50            | 90 (83 <sup>c</sup> )  |
| 8     | [Cp* <i>RhCl</i> <sub>2</sub> ] <sub>2</sub> (4)/AgSbF <sub>6</sub> (16) | DCE              | 70            | 52                     |
| 9     | [Cp* <i>RhCl</i> <sub>2</sub> ] <sub>2</sub> (4)/AgSbF <sub>6</sub> (16) | DCM              | 50            | 80                     |



|    |                                                                  |                  |    |    |
|----|------------------------------------------------------------------|------------------|----|----|
| 10 | [Cp*RhCl <sub>2</sub> ] <sub>2</sub> (4)/AgSbF <sub>6</sub> (16) | DCM <sup>d</sup> | 50 | 80 |
| 11 | [Cp*RhCl <sub>2</sub> ] <sub>2</sub> (4)/AgSbF <sub>6</sub> (16) | DMF              | 50 | 76 |
| 12 | [Cp*RhCl <sub>2</sub> ] <sub>2</sub> (4)/AgSbF <sub>6</sub> (16) | MeOH             | 50 | -  |
| 13 | [Cp*RhCl <sub>2</sub> ] <sub>2</sub> (4)/AgSbF <sub>6</sub> (16) | THF              | 50 | 58 |
| 14 | [Cp*RhCl <sub>2</sub> ] <sub>2</sub> (4)/AgSbF <sub>6</sub> (16) | MeCN             | 50 | -  |
| 15 | [Cp*RhCl <sub>2</sub> ] <sub>2</sub> (4)/AgBF <sub>4</sub> (16)  | DCE              | 50 | 67 |
| 16 | [Cp*RhCl <sub>2</sub> ] <sub>2</sub> (4)/AgPF <sub>6</sub> (16)  | DCE              | 50 | -  |
| 17 | [Cp*RhCl <sub>2</sub> ] <sub>2</sub> (4)/AgOTf (16)              | DCE              | 50 | 83 |
| 18 | [Cp*RhCl <sub>2</sub> ] <sub>2</sub> (4)/AgNTf <sub>2</sub> (16) | DCE              | 50 | -  |

<sup>a</sup>Unless otherwise noted, all reactions were carried out using **1a** (0.1 mmol), and **2a** (0.2 mmol) in a solvent (1.5 mL) for 16 h under air. <sup>b</sup>Yield was determined by <sup>1</sup>H NMR spectroscopy.

<sup>c</sup>Isolated yield in parenthesis. <sup>d</sup>Under N<sub>2</sub>.

**Table S3. Optimization Studies on Co-Catalyzed Amidation With Dioxazolones <sup>a</sup>.**

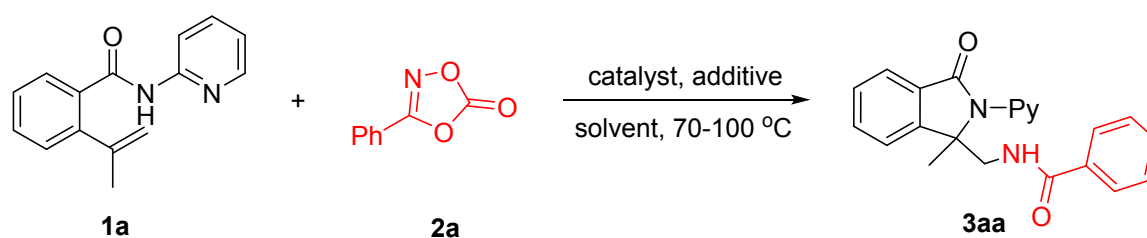

| entry | catalyst (mol%)                                       | Additive (equiv)           | solvent | T (°C) | yield(%) <sup>b</sup> |
|-------|-------------------------------------------------------|----------------------------|---------|--------|-----------------------|
| 1     | Cp*Co(CO)I <sub>2</sub> (8) + AgSbF <sub>6</sub> (16) | AgOAc (0.2)                | DCE     | 70     | 32                    |
| 2     | Cp*Co(CO)I <sub>2</sub> (8) + AgSbF <sub>6</sub> (16) | PivOH (0.5)                | DCE     | 70     | 22                    |
| 3     | Cp*Co(CO)I <sub>2</sub> (8) + AgSbF <sub>6</sub> (16) | AgOAc (1.0)                | DCE     | 70     | 23                    |
| 4     | Cp*Co(CO)I <sub>2</sub> (8) + AgSbF <sub>6</sub> (16) | AgOAc (1.0)                | DCE     | 100    | 43                    |
| 5     | Cp*Co(CO)I <sub>2</sub> (8) + AgSbF <sub>6</sub> (16) | PivOH (1.0)                | DCE     | 100    | 27                    |
| 6     | Cp*Co(CO)I <sub>2</sub> (8) + AgSbF <sub>6</sub> (16) | PivOH (2.0)                | DCE     | 100    | 42                    |
| 7     | Cp*Co(CO)I <sub>2</sub> (8) + AgSbF <sub>6</sub> (16) | Zn(OAc) <sub>2</sub> (2.0) | DCE     | 100    | 52                    |
| 8     | Cp*Co(CO)I <sub>2</sub> (8) + AgSbF <sub>6</sub> (16) | PivOH (2.0)                | TFE     | 100    | 78                    |
| 9     | Cp*Co(CO)I <sub>2</sub> (8) + AgSbF <sub>6</sub> (16) | Zn(OAc) <sub>2</sub> (2.0) | TFE     | 100    | 84(76 <sup>c</sup> )  |
| 10    | Cp*Co(CO)I <sub>2</sub> (8) + AgSbF <sub>6</sub> (16) | Zn(OAc) <sub>2</sub> (2.0) | MeCN    | 100    | 73                    |
| 11    | Cp*Co(CO)I <sub>2</sub> (8) + AgBF <sub>4</sub> (16)  | Zn(OAc) <sub>2</sub> (2.0) | TFE     | 100    | -                     |

|    |                                                      |                            |     |     |   |
|----|------------------------------------------------------|----------------------------|-----|-----|---|
| 12 | Cp*Co(CO)I <sub>2</sub> (8) + AgPF <sub>6</sub> (16) | Zn(OAc) <sub>2</sub> (2.0) | TFE | 100 | - |
| 13 | Cp*Co(CO)I <sub>2</sub> (8) + AgOTf (16)             | Zn(OAc) <sub>2</sub> (2.0) | TFE | 100 | - |

<sup>a</sup>Unless otherwise noted, all reactions were carried out using **1a** (0.1 mmol), and **2a** (0.2 mmol) in a solvent (1.5 mL) for 16 h. <sup>b</sup>Yield was determined by <sup>1</sup>H NMR spectroscopy. <sup>c</sup>Isolated yield.

### b. Cp\*Rh(III)-Catalyzed Pyridine-Directed Amidation With Dioxazolones

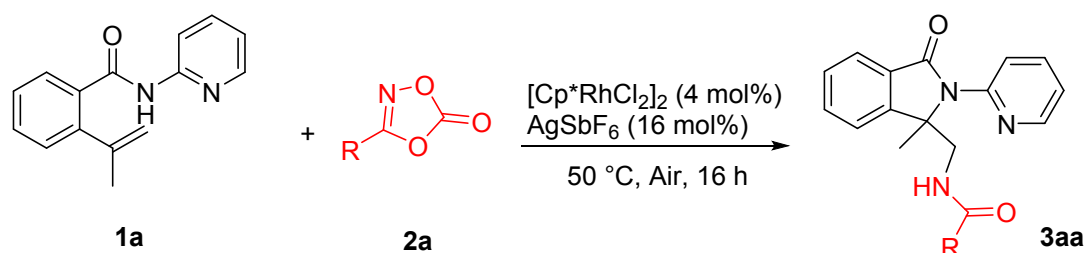

An oven-dried 35 mL round bottom pressure tube was equipped with a magnetic stir bar and was charged with the substrate **1** (0.1 mmol, 1.0 equiv), substrate **2** (0.2 mmol, 2.0 equiv), catalyst [Cp\*RhCl<sub>2</sub>]<sub>2</sub> (2.5 mg, 0.004 mmol, 4.0 mol %), and AgSbF<sub>6</sub> (5.5 mg, 0.016 mmol, 16.0 mol %) under air atmosphere, then the mixture was dissolved in dry 1,2-dichloroethane (DCE, 1.5 mL). Then the mixture was heated to 50 °C under air atmosphere. After stirring for 16 hours, the reaction mixture was cooled to room temperature, and the solvent was removed by rotary evaporation. The residue was purified by flash column chromatography on silica gel (petroleum ether/EtOAc = 3/1) to give the desired product.

### c. Cp\*Co(III)-Catalyzed Pyridine-Directed Amidation With Dioxazolones (3c)

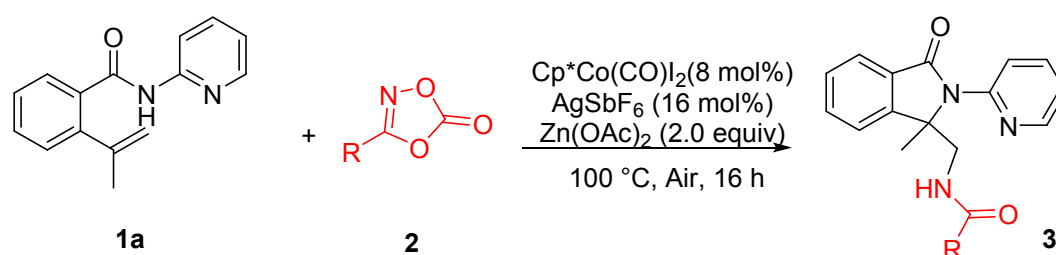

An oven-dried 35 mL round bottom pressure tube was equipped with a magnetic stir bar and was charged with olefin **1** (0.1 mmol, 1.0 equiv), substrate **2** (0.2 mmol, 2.0 equiv), catalyst Cp\*Co(CO)I<sub>2</sub> (3.8 mg, 0.008 mmol, 8.0 mol %), AgSbF<sub>6</sub> (5.5 mg, 0.016 mmol, 16.0 mol %), and Zn(OAc)<sub>2</sub> (36.7mg, 0.2 mmol, 2.0 equiv) under air atmosphere. The mixture was dissolved in dry 2,2,2-trifluoroethanol (TFE, 1.5 mL). Then the mixture was heated to 100 °C under air

atmosphere. After stirring for 16 hours, the reaction mixture was cooled to room temperature, and the solvent was removed by rotary evaporation. The residue was purified by flash column chromatography on silica gel (petroleum ether/EtOAc = 3/1) to give the desired product.

#### d. Cp\*Rh(III)-Catalyzed Pyridine-Directed Amidation With Sulfonamide (3d)

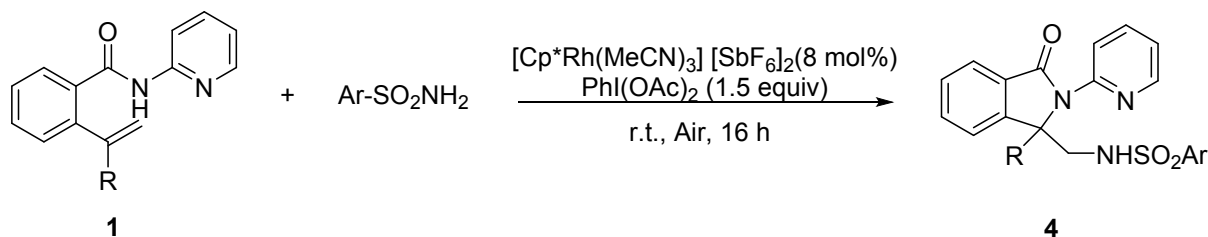

An oven-dried 35 mL round bottom pressure tube was equipped with a magnetic stir bar and was charged with the substrate **1** (0.1 mmol, 1.0 equiv), sulfonamide (0.1 mmol, 1.0 equiv), PhI(OAc)<sub>2</sub> (0.15 mmol, 1.5 equiv), and catalyst [Cp\*Rh(MeCN)<sub>3</sub>][SbF<sub>6</sub>]<sub>2</sub> (6.7 mg, 0.008 mmol, 8.0 mol %) under air atmosphere. Then the mixture was dissolved in dry 1,2-dichloromethane (DCM, 1.5 mL). Then the mixture was stirred at room temperature under air atmosphere. After stirring for 16 hours, the solvent of the reaction mixture was removed by rotary evaporation. The residue was purified by flash column chromatography on silica gel (petroleum ether/EtOAc = 3/1) to give the desired product.

#### 4. Mechanistic Studies.

##### a. Preparation of the Rh(III)-Complex **5**

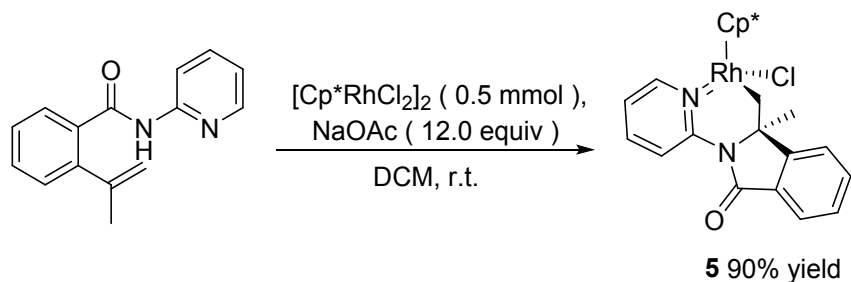

To an oven-dried 35 mL round bottom pressure tube was equipped with a magnetic stir bar was added substrate **1** (0.1 mmol, 1.0 equiv), catalyst [Cp\*RhCl<sub>2</sub>]<sub>2</sub> (30.9 mg, 0.05 mmol, 0.5 equiv), and NaOAc (98.4 mg, 12.0 equiv) in dichloromethane (DCM, 3 mL). After the addition, the reaction was then stirred at r.t. until the reaction was completed, as monitored by TLC. Then the reaction mixture was filtered and the filtrate was concentrated under reduced pressure to afford the Rh(III)-complex as a red solid (92 mg, 90% yield).

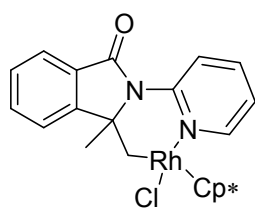

**Rh(III) Complex 5.** red solid.  $^1\text{H NMR}$  (600 MHz,  $\text{CDCl}_3$ )  $\delta$  9.17 (d,  $J$  = 5.6 Hz, 1H), 8.05 (d,  $J$  = 8.3 Hz, 1H), 7.86 (d,  $J$  = 7.6 Hz, 1H), 7.83 – 7.77 (m, 1H), 7.67 (t,  $J$  = 7.4 Hz, 1H), 7.61 (d,  $J$  = 7.6 Hz, 1H), 7.46 (t,  $J$  = 7.4 Hz, 1H), 7.22 – 7.17 (m, 1H), 2.84 (dd,  $J$  = 9.2, 3.0 Hz, 1H), 2.70 (dd,  $J$  = 9.1, 3.5 Hz, 1H), 1.33 (s, 15H), 1.24 (s, 3H).  $^{13}\text{C NMR}$  (150 MHz,  $\text{CDCl}_3$ )  $\delta$  166.7, 155.3, 154.2, 152.4, 138.2, 133.7, 128.1, 127.5, 124.2, 122.1, 120.9, 119.9, 94.5 (d,  $J$  = 6.6 Hz), 67.1, 30.9 (d,  $J$  = 26.6 Hz), 25.7, 8.6. **HRMS (ESI):**  $m/z$ :  $[\text{M}-\text{Cl}]^+$  calculated for  $\text{C}_{25}\text{H}_{28}\text{N}_2\text{ORh}$ : 475.1251, found: 475.1257.

### b. Catalytic activity of complex 5

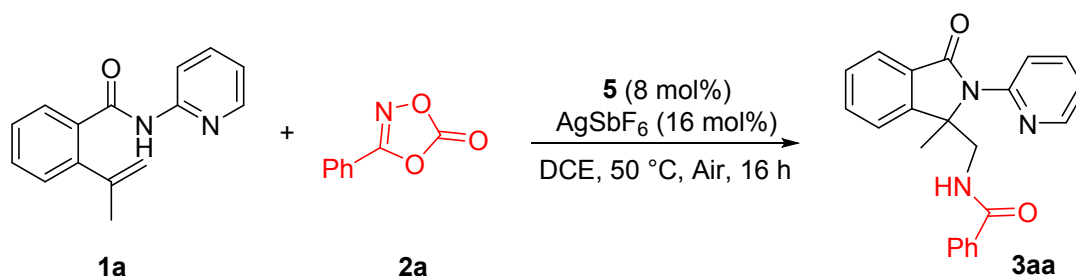

An oven-dried 35 mL round bottom pressure tube, which was equipped with a magnetic stir bar and charged with the substrate **1a** (0.1 mmol, 1.0 equiv), the substrate **2a** (0.2 mmol, 2.0 equiv), Complex **5** (4.1 mg, 0.008 mmol, 8.0 mol %), and  $\text{AgSbF}_6$  (5.5 mg, 0.016 mmol, 16.0 mol %) under air atmosphere. To the mixture was added dry 1,2-dichloroethane (DCE, 1.5 mL). Then the mixture was heated to 50 °C under air atmosphere. After stirring for 16 hours, the reaction mixture was cooled to room temperature, and the solvent was removed by rotary evaporation. The residue was purified by flash column chromatography on silica gel (petroleum ether/EtOAc = 3/1) to give the desired product (22.8 mg, 64% yield).

## 5. NMR Analytical data for new compounds

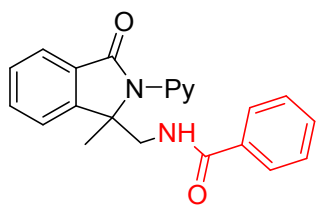

**N-((1-methyl-3-oxo-2-(pyridin-2-yl)isoindolin-1-yl)methyl)benzamide (3aa)**

The title compound **3aa** was synthesized according to the **3b** and **3c**. The product **3aa** was isolated as white solid. Yield: **3b**: 83% (29.1 mg); and **3c**: 76% (26.5 mg). <sup>1</sup>H NMR (600 MHz, CDCl<sub>3</sub>) δ 8.51 (d, *J* = 3.8 Hz, 1H), 8.15 (s, 1H), 8.05 (d, *J* = 8.2 Hz, 1H), 7.89 (d, *J* = 7.6 Hz, 1H), 7.85 (t, *J* = 7.1 Hz, 1H), 7.69 – 7.64 (m, 2H), 7.65 (d, *J* = 7.5 Hz, 2H), 7.53 – 7.48 (m, 1H), 7.45 (t, *J* = 7.3 Hz, 1H), 7.38 (t, *J* = 7.5 Hz, 2H), 7.25 – 7.21 (m, 1H), 4.42 (dd, *J* = 14.1, 6.2 Hz, 1H), 4.06 (dd, *J* = 14.1, 6.0 Hz, 1H), 1.63 (s, 3H). <sup>13</sup>C NMR (150 MHz, CDCl<sub>3</sub>) δ 168.4, 167.4, 150.9, 149.1, 147.8, 138.5, 134.8, 133.3, 131.3, 130.3, 128.9, 128.5, 126.9, 124.0, 122.1, 121.2, 120.5, 68.9, 47.4, 21.9. HRMS (ESI): *m/z*: [M + Na]<sup>+</sup> calculated for C<sub>22</sub>H<sub>19</sub>NaN<sub>3</sub>O<sub>2</sub>:380.1369, found:380.1375.

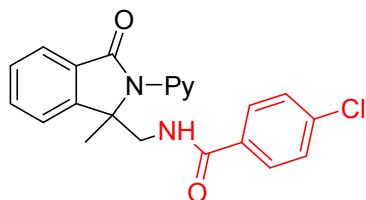

**4-chloro-N-((1-methyl-3-oxo-2-(pyridin-2-yl)isoindolin-1-yl)methyl)benzamide (3ab)**

The title compound **3ab** was synthesized according to the **3b** and **3c**. The product **3ab** was isolated as white solid. Yield: **3b**: 90% (35.3 mg); and **3c**: 47% (18.4 mg). <sup>1</sup>H NMR (600 MHz, CDCl<sub>3</sub>) δ 8.49 (d, *J* = 3.4 Hz, 1H), 8.24 (s, 1H), 8.02 (d, *J* = 8.3 Hz, 1H), 7.90 – 7.82 (m, 2H), 7.67 (d, *J* = 4.2 Hz, 2H), 7.58 (d, *J* = 8.5 Hz, 2H), 7.51 – 7.48 (m, 1H), 7.34 (d, *J* = 8.9 Hz, 2H), 7.25 – 7.23 (m, 1H), 4.38 (dd, *J* = 14.1, 6.1 Hz, 1H), 4.04 (dd, *J* = 14.1, 6.0 Hz, 1H), 1.61 (s, 3H). <sup>13</sup>C NMR (150 MHz, CDCl<sub>3</sub>) δ 168.4, 166.344, 150.844, 149.0, 147.8, 138.6, 137.5, 133.4, 133.1, 130.3, 128.9, 128.8, 128.3, 124.0, 122.1, 121.4, 120.7, 68.8, 47.4, 21.8. HRMS (ESI): *m/z*: [M + Na]<sup>+</sup> calculated for C<sub>22</sub>H<sub>18</sub>ClNaN<sub>3</sub>O<sub>2</sub>: 414.0980, found: 414.0988.

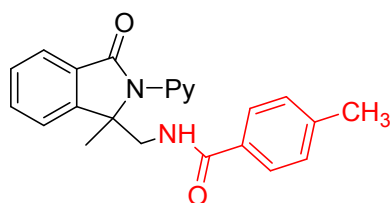

**4-methyl-N-((1-methyl-3-oxo-2-(pyridin-2-yl)isoindolin-1-yl)methyl)benzamide (3ac)**

The title compound **3ac** was synthesized according to the **3b** and **3c**. The product **3ac** was isolated as white solid. Yield: **3b**: 71% (26.4 mg); and **3c**: 65% (24.1 mg). <sup>1</sup>H NMR (600 MHz, CDCl<sub>3</sub>) δ 8.52 – 8.50 (M, 1H), 8.11 (s, 1H), 8.05 (d, *J* = 8.3 Hz, 1H), 7.88 (d, *J* = 7.6 Hz, 1H), 7.86 – 7.82 (m, 1H), 7.71 – 7.65 (m, 2H), 7.55 (d, *J* = 8.1 Hz, 2H), 7.50 – 7.47 (m, 1H), 7.24 – 7.20 (m, 1H), 7.18 (d, *J* = 7.9 Hz, 2H), 4.42 (dd, *J* = 14.1, 6.2 Hz, 1H), 4.04 (dd, *J* = 14.1, 5.9 Hz, 1H), 2.36 (s, 3H), 1.62 (s, 3H).

$^{13}\text{C}$  NMR (150 MHz,  $\text{CDCl}_3$ )  $\delta$  168.4, 167.3, 151.0, 149.2, 147.8, 141.7, 138.5, 133.3, 131.9, 130.3, 129.2, 128.8, 126.9, 123.9, 122.1, 121.2, 120.4, 68.9, 47.3, 21.9, 21.4. HRMS (ESI):  $m/z$ :  $[\text{M} + \text{Na}]^+$  calculated for  $\text{C}_{23}\text{H}_{21}\text{N}_3\text{NaO}_2$ : 394.1526, found: 394.1532

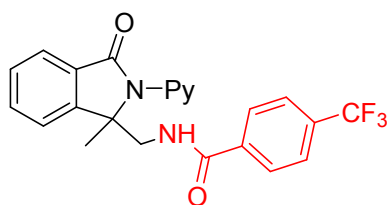

**N-((1-methyl-3-oxo-2-(pyridin-2-yl)isoindolin-1-yl)methyl)-4-(trifluoromethyl)benzamide (3ad)**

The title compound **3ad** was synthesized according to the **3b** and **3c**. The product **3ad** was isolated as white solid.

Yield: **3b**: 71% (30.2 mg); and **3c**: 28% (11.9 mg).  $^1\text{H}$  NMR (600 MHz,  $\text{CDCl}_3$ )  $\delta$  8.49 (d,  $J$  = 3.1 Hz, 1H), 8.38 (s, 1H), 8.03 (d,  $J$  = 8.2 Hz, 1H), 7.91 – 7.84 (m, 2H), 7.75 (d,  $J$  = 8.1 Hz, 2H), 7.69 – 7.67 (m, 2H), 7.65 (d,  $J$  = 8.1 Hz, 2H), 7.52 – 7.50 (m, 1H), 7.27 – 7.23 (m, 1H), 4.40 (dd,  $J$  = 14.1, 6.1 Hz, 1H), 4.06 (dd,  $J$  = 14.1, 6.0 Hz, 1H), 1.63 (s, 3H).  $^{13}\text{C}$  NMR (150 MHz,  $\text{CDCl}_3$ )  $\delta$  168.3, 166.1, 150.8, 148.9, 147.7, 138.6, 138.1, 133.4, 133.1 (q,  $J$  = 32.6 Hz), 130.3, 128.9, 127.3, 125.5 (q,  $J$  = 3.1 Hz), 124.0, 123.6 (q,  $J$  = 272.5 Hz), 122.1, 121.4, 120.8, 68.7, 47.5, 21.8. HRMS (ESI):  $m/z$ :  $[\text{M} + \text{Na}]^+$  calculated for  $\text{C}_{23}\text{H}_{18}\text{F}_3\text{N}_3\text{NaO}_2$ : 448.1243, found: 448.1252

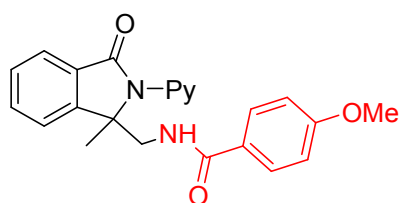

**4-methoxy-N-((1-methyl-3-oxo-2-(pyridin-2-yl)isoindolin-1-yl)methyl)benzamide (3ae)**

The title compound **3ae** was synthesized according to the **3b** and **3c**. The product **3ae** was isolated as white solid. Yield:

**3b**: 84% (32.5 mg); and **3c**: 28% (14.7 mg).  $^1\text{H}$  NMR (600 MHz,  $\text{CDCl}_3$ )  $\delta$  8.54 – 8.49 (m, 1H), 8.05 (d,  $J$  = 8.1 Hz, 1H), 8.00 (s, 1H), 7.88 (d,  $J$  = 7.3 Hz, 1H), 7.86 – 7.82 (m, 1H), 7.70 – 7.65 (m, 2H), 7.62 (d,  $J$  = 8.8 Hz, 2H), 7.50 – 7.47 (m, 1H), 7.24 – 7.21 (m, 1H), 6.87 (d,  $J$  = 8.8 Hz, 2H), 4.40 (dd,  $J$  = 14.1, 6.2 Hz, 1H), 4.05 (dd,  $J$  = 14.1, 6.0 Hz, 1H), 3.81 (s, 3H), 1.62 (s, 3H).  $^{13}\text{C}$  NMR (150 MHz,  $\text{CDCl}_3$ )  $\delta$  168.4, 166.8, 162.1, 151.0, 149.2, 147.8, 138.5, 133.3, 130.3, 128.8, 128.6, 127.1, 123.9, 122.1, 121.2, 120.5, 113.7, 68.9, 55.4, 47.3, 21.9. HRMS (ESI):  $m/z$ :  $[\text{M} + \text{Na}]^+$  calculated for  $\text{C}_{23}\text{H}_{21}\text{N}_3\text{NaO}_3$ : 410.1475, found: 410.1481.

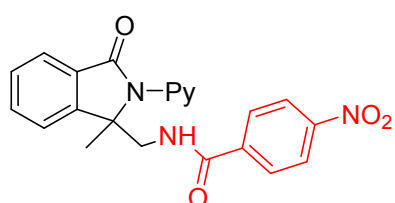

**N-((1-methyl-3-oxo-2-(pyridin-2-yl)isoindolin-1-yl)methyl)-4-nitrobenzamide (3af)**

The title compound **3af** was synthesized according to the **3b** and **3c**. The product **3af** was isolated as white solid.

Yield: **3b**: 32% (13.0 mg); and **3c**: <5% (trace). <sup>1</sup>H NMR (600 MHz, CDCl<sub>3</sub>) δ 8.53 – 8.46 (m, 2H), 8.24 (d, *J* = 8.8 Hz, 2H), 8.02 (d, *J* = 8.2 Hz, 1H), 7.92 – 7.86 (m, 2H), 7.80 (d, *J* = 8.8 Hz, 2H), 7.72 – 7.68 (m, 2H), 7.54 – 7.49 (m, 1H), 7.29 – 7.25 (m, 2H), 4.38 (dd, *J* = 14.1, 6.1 Hz, 1H), 4.06 (dd, *J* = 14.1, 6.0 Hz, 1H), 1.63 (s, 3H). <sup>13</sup>C NMR (150 MHz, CDCl<sub>3</sub>) δ 168.3, 165.3, 150.8, 148.8, 147.7, 140.4, 138.7, 133.4, 130.2, 129.1, 128.0, 124.1, 123.8, 122.1, 121.5, 121.0, 68.6, 47.7, 21.8. HRMS (ESI): *m/z*: [M + Na]<sup>+</sup> calculated for C<sub>22</sub>H<sub>18</sub>N<sub>4</sub>NaO<sub>4</sub>: 425.1220, found: 425.1228.

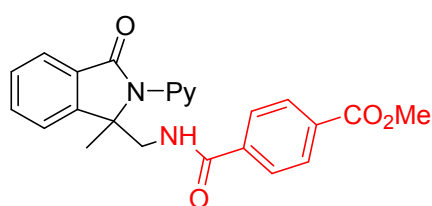

**methyl-4-(((1-methyl-3-oxo-2-(pyridin-2-yl)isoindolin-1-yl)methyl)carbamoyl)benzoate (**3ag**)**

The title compound **3ag** was synthesized according to the **3b** and **3c**. The product **3ag** was isolated as white solid.

Yield: **3b**: 72% (30.0 mg); and **3c**: 34% (14.1 mg). <sup>1</sup>H NMR (600 MHz, CDCl<sub>3</sub>) δ 8.49 (d, *J* = 3.3 Hz, 1H), 8.45 (s, 1H), 8.06 – 8.04 (m, 3H), 7.89 (d, *J* = 7.6 Hz, 1H), 7.87 – 7.84 (m, 1H), 7.71 (d, *J* = 8.2 Hz, 2H), 7.69 (d, *J* = 4.4 Hz, 2H), 7.52 – 7.50 (m, 1H), 7.25-7.23 (m, 1H), 4.44 (dd, *J* = 14.1, 6.3 Hz, 1H), 4.00 (dd, *J* = 14.1, 5.6 Hz, 1H), 3.92 (s, 3H), 1.63 (s, 3H). <sup>13</sup>C NMR (150 MHz, CDCl<sub>3</sub>) δ 168.3, 166.5, 166.3, 150.9, 149.0, 147.7, 138.8, 138.6, 133.4, 132.6, 130.3, 129.8, 128.9, 126.1, 124.1, 122.1, 121.3, 120.6, 68.7, 52.3, 47.6, 21.7. HRMS (ESI): *m/z*: [M + Na]<sup>+</sup> calculated for C<sub>24</sub>H<sub>21</sub>N<sub>3</sub>NaO<sub>4</sub>: 438.1424, found: 438.1432.

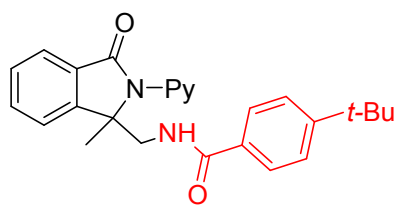

**4-(tert-butyl)-N-(((1-methyl-3-oxo-2-(pyridin-2-yl)isoindolin-1-yl)methyl)benzamide (**3ah**)**

The title compound **3ah** was synthesized according to the **3b** and **3c**. The product **3ah** was isolated as white solid. Yield:

**3b**: 65% (27.0 mg); and **3c**: 64% (26.5 mg). <sup>1</sup>H NMR (600 MHz, CDCl<sub>3</sub>) δ 8.54 – 8.53 (m, 1H), 8.06 – 8.03 (m, 2H), 7.89 (d, *J* = 7.6 Hz, 1H), 7.86 – 7.83 (m, 1H), 7.71 – 7.65 (m, 2H), 7.59 (d, *J* = 8.4 Hz, 2H), 7.50 – 7.48 (m, 1H), 7.39 (d, *J* = 8.4 Hz, 2H), 7.25 – 7.23 (m, 1H), 4.41 (dd, *J* = 14.1, 6.1 Hz, 1H), 4.07 (dd, *J* = 14.1, 6.1 Hz, 1H), 1.62 (s, 3H), 1.30 (s, 9H). <sup>13</sup>C NMR (150 MHz, CDCl<sub>3</sub>) δ 168.4, 167.2, 154.8, 150.9, 149.2, 147.9, 138.5, 133.3, 131.8, 130.3, 128.8, 126.7, 125.4, 124.0, 122.1, 121.2, 120.5, 68.9, 47.2, 34.9, 31.2, 21.9. HRMS (ESI): *m/z*: [M + Na]<sup>+</sup> calculated for C<sub>26</sub>H<sub>27</sub>N<sub>3</sub>NaO<sub>2</sub>: 436.1995, found: 436.2000.

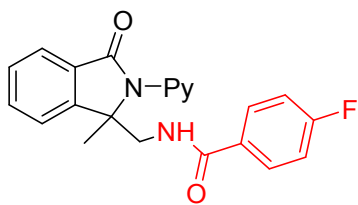

**4-fluoro-N-((1-methyl-3-oxo-2-(pyridin-2-yl)isoindolin-1-yl)methyl)benzamide (3ai).**

The title compound **3ai** was synthesized according to the **3b** and **3c**. The product **3ai** was isolated as white solid. Yield: **3b**: 85% (31.7 mg); and **3c**: 74% (27.8 mg). <sup>1</sup>H NMR (600 MHz, CDCl<sub>3</sub>) δ 8.50 – 8.49 (m, 1H), 8.14 (s, 1H), 8.02 (d, *J* = 8.3 Hz, 1H), 7.92 – 7.83 (m, 2H), 7.68 (d, *J* = 4.1 Hz, 2H), 7.66 – 7.63 (m, 2H), 7.51 – 7.47 (m, 1H), 7.25 – 7.23 (m, 1H), 7.05 (t, *J* = 8.6 Hz, 2H), 4.37 (dd, *J* = 14.1, 6.1 Hz, 1H), 4.07 (dd, *J* = 14.1, 6.2 Hz, 1H), 1.62 (s, 3H). <sup>13</sup>C NMR (150 MHz, CDCl<sub>3</sub>) δ 168.4, 166.3, 164.1 (d, *J* = 251.6 Hz), 150.9, 149.0, 147.8, 138.6, 133.3, 130.9 (d, *J* = 3.1 Hz), 130.3, 129.1 (d, *J* = 8.9 Hz), 128.9, 124.0, 122.1, 121.3, 120.7, 115.5 (d, *J* = 21.9 Hz), 68.83, 47.39, 21.85. HRMS (ESI): *m/z*: [M + Na]<sup>+</sup> calculated for C<sub>22</sub>H<sub>18</sub>FN<sub>3</sub>NaO<sub>2</sub>: 398.1275, found: 398.1284.

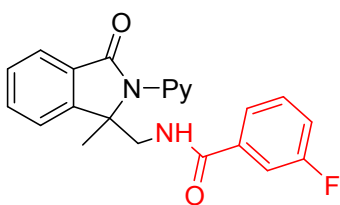

**3-fluoro-N-((1-methyl-3-oxo-2-(pyridin-2-yl)isoindolin-1-yl)methyl)benzamide (3aj)**

The title compound **3aj** was synthesized according to the **3b** and **3c**. The product **3aj** was isolated as white solid. Yield: **3b**: 97% (36.5 mg); and **3c**: 52% (19.5 mg). <sup>1</sup>H NMR (600 MHz, CDCl<sub>3</sub>) δ 8.50 (d, *J* = 3.7 Hz, 1H), 8.39 (s, 1H), 8.04 (d, *J* = 8.2 Hz, 1H), 7.89 (d, *J* = 7.6 Hz, 1H), 7.87 – 7.84 (m, 1H), 7.71 – 7.66 (m, 2H), 7.52 – 7.49 (m, 2H), 7.44 – 7.39 (m, 1H), 7.26 – 7.24 (m, 2H), 7.17 – 7.13 (m, 1H), 4.44 (dd, *J* = 14.1, 6.2 Hz, 1H), 4.02 (dd, *J* = 14.1, 5.7 Hz, 1H), 2.36 (s, 3H). <sup>13</sup>C NMR (150 MHz, CDCl<sub>3</sub>) δ 168.3, 166.1, 162.7 (d, *J* = 247.5 Hz), 150.8, 149.0, 147.7, 138.6, 137.1 (d, *J* = 6.8 Hz), 133.4, 130.2 (d, *J* = 5.2 Hz), 130.1, 128.9, 124.1, 122.3 (d, *J* = 3.0 Hz), 122.1, 121.3, 120.6, 118.3 (d, *J* = 21.3 Hz), 114.3 (d, *J* = 22.8 Hz), 68.7, 47.6, 21.7. HRMS (ESI): *m/z*: [M + Na]<sup>+</sup> calculated for C<sub>22</sub>H<sub>18</sub>FN<sub>3</sub>NaO<sub>2</sub>: 398.1275, found: 398.1275.

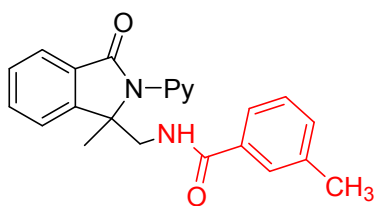

**3-methyl-N-((1-methyl-3-oxo-2-(pyridin-2-yl)isoindolin-1-yl)methyl)benzamide (3ak)**

The title compound **3ak** was synthesized according to the **3b** and **3c**. The product **3ak** was isolated as white solid. Yield: **3b**: 82% (30.5 mg); and **3c**: 57% (21.2 mg). <sup>1</sup>H NMR (600 MHz, CDCl<sub>3</sub>) δ 8.50 (d, *J* = 3.2 Hz, 1H), 8.15 (s, 1H), 8.06 (d, *J* = 8.3 Hz, 1H), 7.89 (d, *J* = 7.6 Hz, 1H), 7.86 – 7.83 (m, 1H), 7.71 – 7.66



(m, 2H), 7.51 – 7.48 (m, 2H), 7.44 – 7.39 (m, 1H), 7.28 – 7.24 (m, 2H), 7.24 – 7.21 (m, 1H), 4.44 (dd,  $J = 14.1, 6.2$  Hz, 1H), 4.02 (dd,  $J = 14.1, 5.7$  Hz, 1H), 2.36 (s, 3H), 1.63 (s, 3H).  $^{13}\text{C}$  NMR (150 MHz,  $\text{CDCl}_3$ )  $\delta$  168.3, 167.5, 151.0, 149.2, 147.7, 138.5, 138.3, 134.8, 133.3, 132.0, 130.3, 128.9, 128.4, 127.7, 124.0, 123.7, 122.1, 121.1, 120.4, 68.9, 47.4, 21.9, 21.4. HRMS (ESI):  $m/z$ :  $[\text{M} + \text{Na}]^+$  calculated for :  $\text{C}_{23}\text{H}_{21}\text{NNaO}_2$ : 394.1526, found: 394.1525.

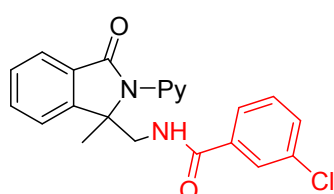

**3-chloro-N-((1-methyl-3-oxo-2-(pyridin-2-yl)isoindolin-1-yl)methyl)benzamide (3al)**

The title compound **3al** was synthesized according to the **3b** and **3c**. The product **3al** was isolated as white solid. Yield: **3b**: 74% (29.1 mg); and **3c**: 36% (14.1 mg).  $^1\text{H}$  NMR (600 MHz,  $\text{CDCl}_3$ )  $\delta$  8.55 – 8.52 (m, 2H), 8.05 (d,  $J = 8.3$  Hz, 1H), 7.90 (d,  $J = 7.6$  Hz, 1H), 7.87 – 7.83 (m, 1H), 7.72 – 7.65 (m, 3H), 7.55 – 7.49 (m, 2H), 7.45 – 7.41 (m, 1H), 7.33 (t,  $J = 7.8$  Hz, 1H), 7.25 – 7.23 (m, 1H), 4.43 (dd,  $J = 14.2, 6.5$  Hz, 1H), 3.92 (dd,  $J = 14.2, 5.3$  Hz, 1H), 1.61 (s, 3H).  $^{13}\text{C}$  NMR (150 MHz,  $\text{CDCl}_3$ )  $\delta$  168.3, 166.0, 150.8, 149.0, 147.7, 138.6, 136.6, 134.7, 133.4, 131.3, 130.2, 129.8, 129.0, 127.3, 124.9, 124.1, 122.1, 121.3, 120.6, 68.7, 47.8, 21.6. HRMS (ESI):  $m/z$ :  $[\text{M} + \text{Na}]^+$  calculated for  $\text{C}_{22}\text{H}_{18}\text{ClN}_3\text{NaO}_2$ : 414.0980, found: 414.0976.

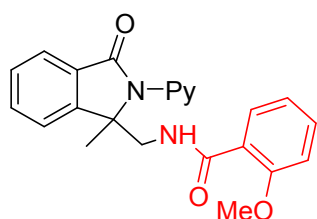

**2-methoxy-N-((1-methyl-3-oxo-2-(pyridin-2-yl)isoindolin-1-yl)methyl)benzamide (3am)**

The title compound **3am** was synthesized according to the **3b** and **3c**. The product **3am** was isolated as white solid. Yield: **3b**: 74% (29.1 mg); and **3c**: 36% (14.1 mg).  $^1\text{H}$  NMR (600 MHz,  $\text{CDCl}_3$ )  $\delta$  8.50 – 8.49 (m, 1H), 8.20 (d,  $J = 8.3$  Hz, 1H), 7.99 (s, 1H), 7.93 (dd,  $J = 7.8, 1.9$  Hz, 1H), 7.86 (d,  $J = 7.6$  Hz, 1H), 7.81 – 7.78 (m, 1H), 7.65 – 7.64 (m, 2H), 7.49 – 7.42 (m, 1H), 7.32 – 7.29 (m, 1H), 7.18 – 7.15 (m, 1H), 6.95 – 6.88 (m, 1H), 6.79 (d,  $J = 8.3$  Hz, 1H), 4.53 – 4.48 (m, 2H), 3.61 (s, 3H), 1.77 (s, 3H).  $^{13}\text{C}$  NMR (150 MHz,  $\text{CDCl}_3$ )  $\delta$  164.80, 157.38, 149.22, 147.99, 137.87, 133.17, 132.47, 131.96, 130.72, 128.64, 123.66, 121.81, 121.27, 120.89, 120.58, 118.91, 111.18, 68.75, 55.55, 46.35, 23.30. HRMS (ESI):  $m/z$ :  $[\text{M} + \text{Na}]^+$  calculated for  $\text{C}_{23}\text{H}_{21}\text{N}_3\text{NaO}_3$ : 410.1475, found: 410.1475.

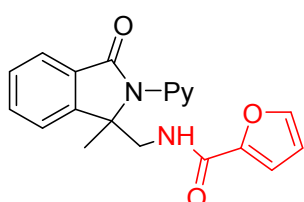

**N-((1-methyl-3-oxo-2-(pyridin-2-yl)isoindolin-1-yl)methyl)furan-2-carboxamide (3an)**

The title compound **3an** was synthesized according to the **3b** and **3c**. The product **3an** was isolated as white solid. Yield: **3b**: 87% (30.1 mg); and **3c**: 30% (10.3 mg). <sup>1</sup>H NMR (600 MHz, CDCl<sub>3</sub>) δ 8.60 – 8.58 (m, 1H), 8.42 (s, 1H), 8.12 (d, *J* = 8.2 Hz, 1H), 7.89 (d, *J* = 7.6 Hz, 1H), 7.87 – 7.81 (m, 1H), 7.68 (d, *J* = 6.9 Hz, 2H), 7.54 – 7.48 (m, 1H), 7.42 (s, 1H), 7.23 – 7.21 (m, 1H), 7.01 (d, *J* = 3.4 Hz, 1H), 6.45 – 6.44 (m, 1H), 4.49 (dd, *J* = 14.2, 6.8 Hz, 1H), 3.94 (dd, *J* = 14.2, 5.7 Hz, 1H), 1.62 (s, 3H). <sup>13</sup>C NMR (150 MHz, CDCl<sub>3</sub>) δ 168.2, 158.2, 150.9, 149.1, 148.1, 147.6, 143.8, 138.4, 133.3, 130.3, 128.8, 124.1, 122.0, 120.9, 119.8, 114.1, 112.0, 68.7, 46.8, 21.9. HRMS (ESI): *m/z*: [M + Na]<sup>+</sup> calculated for C<sub>20</sub>H<sub>17</sub>N<sub>3</sub>NaO<sub>3</sub>: 370.1162, found: 370.1163.

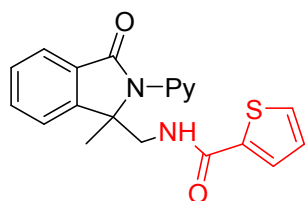

**N-((1-methyl-3-oxo-2-(pyridin-2-yl)isoindolin-1-yl)methyl)thiophene-2-carboxamide (3ao)**

The title compound **3ao** was synthesized according to the **3b** and **3c**. The product **3ao** was isolated as white solid. Yield: **3b**: 93% (33.9 mg); and **3c**: 25% (9.1 mg). <sup>1</sup>H NMR (600 MHz, CDCl<sub>3</sub>) δ 8.58 (d, *J* = 3.1 Hz, 1H), 8.28 (s, 1H), 8.08 (d, *J* = 8.3 Hz, 1H), 7.89 (d, *J* = 7.6 Hz, 1H), 7.86 – 7.83 (m, 1H), 7.71 – 7.64 (m, 2H), 7.53 – 7.48 (m, 1H), 7.46 (d, *J* = 3.2 Hz, 1H), 7.42 (d, *J* = 4.9 Hz, 1H), 7.24 – 7.22 (m, 1H), 7.06 – 7.01 (m, 1H), 4.44 (dd, *J* = 14.2, 6.7 Hz, 1H), 3.89 (dd, *J* = 14.2, 5.2 Hz, 1H), 1.61 (s, 3H). <sup>13</sup>C NMR (150 MHz, CDCl<sub>3</sub>) δ 168.2, 161.7, 150.9, 149.2, 147.7, 139.0, 138.5, 133.4, 130.2, 129.5, 128.9, 128.2, 127.5, 124.1, 122.1, 121.1, 120.3, 68.7, 47.6, 21.7. HRMS (ESI): *m/z*: [M + Na]<sup>+</sup> calculated for C<sub>20</sub>H<sub>17</sub>N<sub>3</sub>NaO<sub>2</sub>S: 386.0934, found: 386.0936.

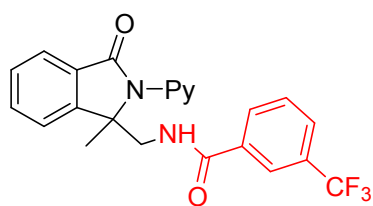

**N-((1-methyl-3-oxo-2-(pyridin-2-yl)isoindolin-1-yl)methyl)-3-(trifluoromethyl)benzamide (3ap)**

The title compound **3ap** was synthesized according to the **3b** and **3c**. The product **3ap** was isolated as white solid. Yield: **3b**: 59% (25.0 mg); and **3c**: <5% (trace). <sup>1</sup>H NMR (600 MHz, CDCl<sub>3</sub>) δ 8.70 (s, 1H), 8.50 – 8.49 (m, 1H), 8.05 (d, *J* = 8.3 Hz, 1H), 7.99 (s, 1H), 7.90 (d, *J* = 7.6 Hz, 1H), 7.88 – 7.85 (m, 2H), 7.73 (d, *J* = 7.8 Hz, 1H), 7.71 – 7.68 (m, 2H), 7.57 – 7.51 (m, 2H), 7.26 – 7.24 (m, 1H), 4.46 (dd, *J* = 14.2, 6.6 Hz, 1H), 3.92 (dd, *J* = 14.2, 5.2 Hz, 1H), 1.62 (s, 3H). <sup>13</sup>C NMR (150 MHz, CDCl<sub>3</sub>) δ 168.3, 165.9, 150.8, 149.0, 147.6, 138.7, 135.7, 133.4, 131.1 (q, *J* = 32.7 Hz), 130.2, 130.1, 129.2, 129.0, 127.9 (q, *J* = 3.5 Hz), 124.1, 124.0 (q, *J* = 3.8 Hz), 123.7 (q, *J* = 272.5 Hz),

122.1, 121.3, 120.7, 68.67, 47.92, 21.57. HRMS (ESI):  $m/z$ :  $[M + Na]^+$  calculated for  $C_{23}H_{18}F_3N_3NaO_2$ : 448.1243, found: 448.1244.

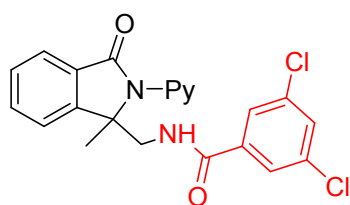

**3,5-dichloro-N-((1-methyl-3-oxo-2-(pyridin-2-yl)isoindolin-1-yl)methyl)benzamide (3aq)**

The title compound **3aq** was synthesized according to the **3b** and **3c**. The product **3aq** was isolated as white solid. Yield: **3b**: 66% (28.2 mg); and **3c**: 42% (17.2 mg).  $^1H$  NMR (600 MHz,  $CDCl_3$ )  $\delta$  9.01 (s, 1H), 8.54 – 8.53 (m, 1H), 8.05 – 8.04 (m, 1H), 7.92 (d,  $J = 7.6$  Hz, 1H), 7.88 – 7.85 (m, 1H), 7.72 – 7.70 (m, 1H), 7.67 (d,  $J = 7.7$  Hz, 1H), 7.61 (d,  $J = 2.0$  Hz, 2H), 7.55 – 7.53 (m, 1H), 7.46 (t,  $J = 1.9$  Hz, 1H), 7.28 – 7.25 (m, 2H), 4.45 (dd,  $J = 14.2, 7.1$  Hz, 1H), 3.76 (dd,  $J = 14.2, 4.6$  Hz, 1H), 1.60 (s, 3H).  $^{13}C$  NMR (150 MHz,  $CDCl_3$ )  $\delta$  168.3, 164.7, 150.7, 148.9, 147.5, 138.8, 137.7, 135.4, 133.5, 131.2, 130.1, 129.1, 125.6, 124.2, 122.1, 121.4, 120.7, 68.6, 48.3, 21.3. HRMS (ESI):  $m/z$ :  $[M + Na]^+$  calculated for  $C_{22}H_{17}Cl_2N_3NaO_2$ : 448.0590, found: 448.0589.

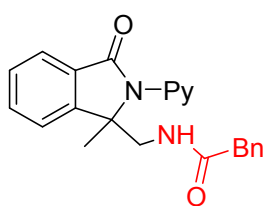

**N-((1-methyl-3-oxo-2-(pyridin-2-yl)isoindolin-1-yl)methyl)-3-phenylpropanamide (3ar)**

The title compound **3ar** was synthesized according to the **3b** and **3c**. The product **3ar** was isolated as white solid. Yield: **3b**: 47% (17.5 mg); and **3c**: 39% (14.5 mg).  $^1H$  NMR (600 MHz,  $CDCl_3$ )  $\delta$  8.12 – 8.11 (m, 1H), 7.96 (d,  $J = 8.3$  Hz, 1H), 7.84 (d,  $J = 7.5$  Hz, 1H), 7.76 – 7.73 (m, 1H), 7.63 (t,  $J = 7.5$  Hz, 1H), 7.57 (d,  $J = 7.6$  Hz, 1H), 7.48 (t,  $J = 7.4$  Hz, 1H), 7.25 – 7.19 (m, 3H), 7.10 – 7.08 (m, 1H), 6.98 – 6.92 (m, 2H), 6.49 (s, 1H), 4.15 (dd,  $J = 14.0, 5.4$  Hz, 1H), 4.03 (dd,  $J = 14.0, 7.3$  Hz, 1H), 3.38 – 3.31 (m, 2H), 1.56 (s, 3H).  $^{13}C$  NMR (150 MHz,  $CDCl_3$ )  $\delta$  170.68, 167.98, 150.82, 148.96, 147.69, 138.05, 134.64, 133.12, 130.39, 129.22, 128.88, 128.67, 127.07, 123.79, 122.03, 120.69, 119.54, 68.62, 46.06, 43.71, 22.55. HRMS (ESI):  $m/z$ :  $[M + Na]^+$  calculated for  $C_{23}H_{21}N_3NaO_2$ : 394.1526, found: 394.1528.

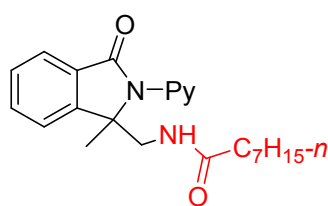

**N-((1-methyl-3-oxo-2-(pyridin-2-yl)isoindolin-1-yl)methyl)octanamide (3as)**

The title compound **3as** was synthesized according to the **3b** and **3c**. The product **3as** was isolated as white solid. Yield: **3b**: 88% (33.4 mg); and **3c**: 71% (26.9 mg).  $^1H$  NMR (600 MHz,  $CDCl_3$ )  $\delta$  8.50 – 8.49 (m, 1H), 8.03 (d,

$J = 8.2$  Hz, 1H), 7.87 (d,  $J = 7.6$  Hz, 1H), 7.83 – 7.81 (m, 1H), 7.67 – 7.64 (m, 1H), 7.62 (d,  $J = 7.6$  Hz, 1H), 7.49 (t,  $J = 7.3$  Hz, 1H), 7.22 – 7.19 (m, 1H), 6.54 (s, 1H), 4.21 – 4.13 (m, 2H), 2.00 – 1.95 (m, 1H), 1.92 – 1.87 (m, 1H), 1.59 (s, 3H), 1.31 (m, 2H), 1.28 – 1.20 (m, 2H), 1.18 – 1.12 (m, 4H), 1.06 – 0.96 (m, 2H), 0.86 (t,  $J = 7.2$  Hz, 3H).  $^{13}\text{C}$  NMR (150 MHz,  $\text{CDCl}_3$ )  $\delta$  172.7, 168.4, 151.1, 148.9, 147.9, 138.2, 133.1, 130.5, 128.7, 123.7, 122.2, 121.0, 120.1, 68.9, 45.9, 36.8, 31.6, 28.9, 28.8, 25.7, 22.6, 22.4, 14.1. HRMS (ESI):  $m/z$ :  $[\text{M} + \text{Na}]^+$  calculated for  $\text{C}_{23}\text{H}_{29}\text{N}_3\text{NaO}_2$ : 402.2152, found: 402.2152.

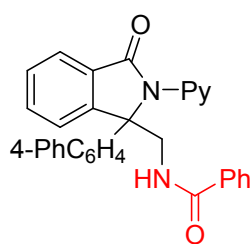

**N-((1-(4-phenylphenyl)-3-oxo-2-(pyridin-2-yl)isoindolin-1-yl)methyl)benzamide (4ba)**

The title compound **4ba** was synthesized according to the **3b** and **3c**. The product **4ba** was isolated as white solid. Yield: **3b**: 64% (31.8 mg); and **3c**: 24% (11.9 mg).  $^1\text{H}$  NMR (600 MHz,  $\text{CDCl}_3$ )  $\delta$  8.48 (s, 1H), 8.30 –

8.29 (m, 1H), 8.12 (d,  $J = 8.3$  Hz, 1H), 7.93 (d,  $J = 7.5$  Hz, 1H), 7.77 – 7.80 (m, 1H), 7.61 – 7.56 (m, 3H), 7.50 – 7.41 (m, 7H), 7.39 – 7.28 (m, 7H), 7.11 – 7.09 (m, 1H), 4.98 (dd,  $J = 14.0$ , 5.5 Hz, 1H), 4.65 (dd,  $J = 14.0$ , 6.1 Hz, 1H).  $^{13}\text{C}$  NMR (150 MHz,  $\text{CDCl}_3$ )  $\delta$  169.3, 167.7, 150.9, 149.1, 147.7, 140.5, 134.0, 138.5, 137.3, 134.9, 133.6, 131.3, 129.7, 128.9, 128.8, 128.7, 128.5, 127.5, 127.4, 126.9, 126.5, 124.3, 123.2, 121.2, 120.3, 73.4, 45.7.

HRMS (ESI):  $m/z$ :  $[\text{M} + \text{Na}]^+$  calculated for  $\text{C}_{33}\text{H}_{25}\text{N}_3\text{NaO}_2$ : 518.1839, Found: 518.1842.

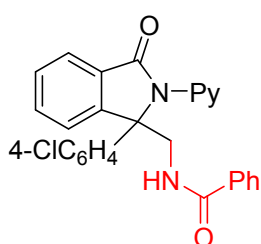

**N-((1-(4-chlorophenyl)-3-oxo-2-(pyridin-2-yl)isoindolin-1-yl)methyl)benzamide (4ca)**

The title compound **4ca** was synthesized according to the **3b** and **3c**. The product **4ca** was isolated as white solid. Yield: **3b**: 81% (36.7 mg); and **3c**: 35% (15.9 mg).  $^1\text{H}$  NMR (600 MHz,  $\text{CDCl}_3$ )  $\delta$  8.38 (s, 1H), 8.27 –

8.25 (m, 1H), 8.14 (d,  $J = 8.2$  Hz, 1H), 7.91 (d,  $J = 7.6$  Hz, 1H), 7.80 – 7.76 (m, 1H), 7.59 – 7.54 (m, 3H), 7.47 – 7.41 (m, 2H), 7.39 (d,  $J = 7.8$  Hz, 1H), 7.35 (t,  $J = 7.6$  Hz, 2H), 7.19 (s, 4H), 7.11 – 7.09 (m, 1H), 4.96 (dd,  $J = 14.0$ , 5.6 Hz, 1H), 4.56 (dd,  $J = 14.0$ , 5.9 Hz, 1H).  $^{13}\text{C}$  NMR (150 MHz,  $\text{CDCl}_3$ )  $\delta$  169.1, 167.6, 150.7, 148.7, 147.6, 138.6, 137.0, 134.7, 133.8, 133.7, 131.4, 129.6, 129.1, 129.0, 128.5, 127.5, 126.9, 124.1, 123.1, 121.1, 119.8, 72.9, 45.7. HRMS (ESI):  $m/z$ :  $[\text{M} + \text{Na}]^+$  calculated for  $\text{C}_{27}\text{H}_{20}\text{ClN}_3\text{NaO}_2$ : 476.1136, Found: 476.1146.

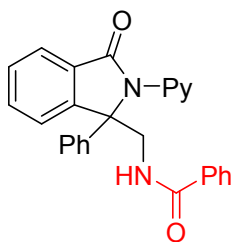

**N-((1-([1,1'-biphenyl]-4-yl)-2-(4-methylpyridin-2-yl)-3-oxoisindolin-1-yl)methyl)benzamide (4da)**

The title compound **4da** was synthesized according to the **3b** and **3c**. The product **4da** was isolated as white solid. Yield: **3b**: 94% (47.7 mg); and **3c**: 41% (20.9 mg). <sup>1</sup>H NMR (600 MHz, CDCl<sub>3</sub>) δ 8.73 (s, 1H), 8.14 (d, *J* = 5.1 Hz, 1H), 7.95 – 7.89 (m, 2H), 7.62 (d, *J* = 7.0 Hz, 2H), 7.56 (t, *J* = 7.5 Hz, 1H), 7.50 – 7.40 (m, 7H), 7.38 – 7.27 (m, 7H), 6.92 (d, *J* = 5.1 Hz, 1H), 4.96 (dd, *J* = 14.0, 5.6 Hz, 1H), 4.59 (dd, *J* = 14.0, 5.9 Hz, 1H), 2.39 (s, 3H). <sup>13</sup>C NMR (150 MHz, CDCl<sub>3</sub>) δ 169.3, 167.6, 150.8, 150.0, 149.2, 147.3, 140.4, 140.0, 137.3, 135.0, 133.6, 131.3, 129.7, 128.9, 128.8, 128.5, 127.5, 127.4, 126.9, 126.9, 126.5, 124.0, 123.2, 122.5, 120.9, 73.4, 45.9, 21.4. HRMS (ESI): *m/z*: [*M* + Na]<sup>+</sup> calculated for C<sub>34</sub>H<sub>27</sub>N<sub>3</sub>NaO<sub>2</sub>: 532.1995, found: 532.2002.

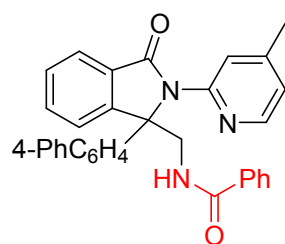

**N-((3-oxo-1-phenyl-2-(pyridin-2-yl)isoindolin-1-yl)methyl)benzamide (4ea)**

The title compound **4ea** was synthesized according to the **3b** and **3c**.

The product **4ea** was isolated as white solid. Yield: **3b**: 84% (35.0 mg); and **3c**: 22% (9.2 mg). <sup>1</sup>H NMR (600 MHz, CDCl<sub>3</sub>) δ 8.38 (s, 1H), 8.27 – 8.26 (m, 1H), 8.09 (d, *J* = 8.3 Hz, 1H), 7.91 (d, *J* = 7.6 Hz, 1H), 7.79 – 7.76 (m, 1H), 7.58 – 7.54 (m, 3H), 7.46 – 7.39 (m, 3H), 7.34 (t, *J* = 7.6 Hz, 2H), 7.27 – 7.21 (m, 4H), 7.20 – 7.16 (m, 1H), 7.10 – 7.07 (m, 1H), 4.94 (dd, *J* = 13.9, 5.4 Hz, 1H), 4.65 (dd, *J* = 13.9, 6.2 Hz, 1H).

<sup>13</sup>C NMR (150 MHz, CDCl<sub>3</sub>) δ 169.3, 167.6, 150.9, 149.2, 147.7, 138.4, 138.4, 134.9, 133.6, 131.3, 129.7, 128.9, 128.9, 128.5, 127.8, 126.9, 126.1, 124.0, 123.2, 121.1, 120.3, 73.5, 45.6. HRMS (ESI): *m/z*: [*M* + Na]<sup>+</sup> calculated for C<sub>27</sub>H<sub>21</sub>N<sub>3</sub>NaO<sub>2</sub>: 442.1526, found: 442.1533.

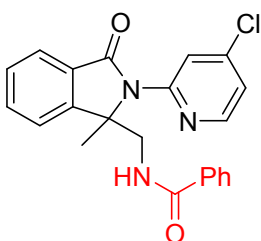

**N-((2-(4-chloropyridin-2-yl)-1-methyl-3-oxoisindolin-1-yl)methyl)benzamide (4fa)**

The title compound **4fa** was synthesized according to the **3b** and **3c**. The product **4fa** was isolated as white solid. Yield: **3b**: 84% (33.0 mg); and **3c**: 42% (16.5 mg). <sup>1</sup>H NMR (600 MHz, CDCl<sub>3</sub>) δ 8.37 (d, *J* = 5.4 Hz, 1H), 8.29 (s, 1H), 7.88 (d, *J* = 7.6 Hz, 1H), 7.70 – 7.63 (m, 3H), 7.57 (d, *J* = 7.3 Hz, 2H), 7.51 – 7.47 (m, 1H), 7.43 (t, *J* = 7.4 Hz, 1H), 7.35 (t, *J* = 7.6 Hz, 2H), 7.20 – 7.19 (m, 1H), 4.53 (dd, *J* = 14.1, 6.0 Hz, 1H), 4.09 (dd, *J* = 14.1, 6.1 Hz, 1H), 1.69 (s, 3H). <sup>13</sup>C NMR (150 MHz, CDCl<sub>3</sub>)

$\delta$  168.3, 167.5, 152.1, 149.1, 148.1, 145.9, 134.6, 133.7, 131.4, 129.9, 129.0, 128.5, 126.8, 124.1, 122.1, 121.3, 119.4, 69.3, 47.1, 22.1. HRMS (ESI):  $m/z$ :  $[M + Na]^+$  calculated for  $C_{22}H_{18}ClN_3NaO_2$ : 414.0980, found: 414.0985.

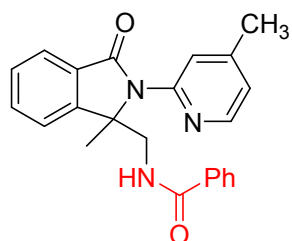

**N-((1-methyl-2-(4-methylpyridin-2-yl)-3-oxoisindolin-1-yl)methyl)benzamide (4ga)**

The title compound **4ga** was synthesized according to the **3b** and **3c**. The product **4ga** was isolated as white solid. Yield: **3b**: 44% (16.4 mg); and **3c**: 20% (7.4 mg).  $^1H$  NMR (600 MHz,  $CDCl_3$ )  $\delta$  8.39 (s, 1H), 8.36 (d,  $J = 5.1$  Hz, 1H), 7.88 (d,  $J = 7.5$  Hz, 1H), 7.80 (s, 1H), 7.71 – 7.65 (m, 4H), 7.51 – 7.44 (m, 1H), 7.45 (t,  $J = 7.4$  Hz, 1H), 7.38 (t,  $J = 7.6$  Hz, 2H), 7.06 (d,  $J = 5.0$  Hz, 1H), 4.36 (dd,  $J = 14.1, 6.3$  Hz, 1H), 4.02 (dd,  $J = 14.1, 5.9$  Hz, 1H), 2.44 (s, 3H), 1.59 (s, 3H).  $^{13}C$  NMR (150 MHz,  $CDCl_3$ )  $\delta$  168.3, 167.3, 150.8, 150.1, 149.1, 147.5, 134.8, 133.2, 131.3, 130.4, 128.8, 128.5, 126.9, 123.9, 122.6, 122.1, 121.4, 68.8, 47.5, 21.8, 21.3. HRMS (ESI):  $m/z$ :  $[M + Na]^+$  calculated for  $C_{23}H_{21}N_3NaO_2$ : 394.1526, found: 394.1531.

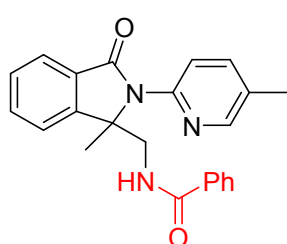

**N-((1-methyl-2-(5-methylpyridin-2-yl)-3-oxoisindolin-1-yl)methyl)benzamide (4ha)**

The title compound **4ha** was synthesized according to the **3b** and **3c**. The product **4ha** was isolated as white solid. Yield: **3b**: 86% (32.0 mg); and **3c**: 36% (13.4 mg).  $^1H$  NMR (600 MHz,  $CDCl_3$ )  $\delta$  8.33 (d,  $J = 2.4$  Hz, 1H), 8.23 (s, 1H), 7.87 (d,  $J = 7.6$  Hz, 1H), 7.84 (d,  $J = 8.3$  Hz, 1H), 7.71 – 7.61 (m, 5H), 7.47 – 7.49 (m, 1H), 7.44 (t,  $J = 7.4$  Hz, 1H), 7.37 (t,  $J = 7.6$  Hz, 2H), 4.30 (dd,  $J = 14.1, 6.0$  Hz, 1H), 4.08 (dd,  $J = 14.0, 6.3$  Hz, 1H), 2.38 (s, 3H), 1.59 (s, 3H).  $^{13}C$  NMR (150 MHz,  $CDCl_3$ )  $\delta$  168.3, 167.3, 149.0, 148.4, 148.1, 139.2, 134.8, 133.1, 131.3, 131.2, 130.5, 128.8, 128.5, 126.9, 123.9, 122.1, 120.5, 68.6, 47.2, 21.9, 18.0. HRMS (ESI):  $m/z$ :  $[M + Na]^+$  calculated for  $C_{23}H_{21}N_3NaO_2$ : 394.1526, found: 394.1531.

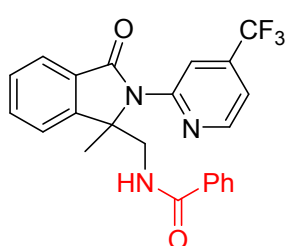

**N-((1-methyl-3-oxo-2-(4-(trifluoromethyl)pyridin-2-yl)isindolin-1-yl)methyl)benzamide (4ia)**

The title compound **4ia** was synthesized according to the **3b** and **3c**. The product **4ia** was isolated as white solid. Yield: **3b**: 86% (32.0 mg); and **3c**: 36% (13.4 mg).  $^1H$  NMR (600 MHz,  $CDCl_3$ )  $\delta$  8.67 – 8.60 (m,

2H), 7.90 (d,  $J = 7.6$  Hz, 1H), 7.67-7.71 (m, 2H), 7.50-7.52 (m, 3H), 7.42 (t,  $J = 7.4$  Hz, 1H), 7.38 (d,  $J = 3.8$  Hz, 1H), 7.34 (t,  $J = 7.6$  Hz, 2H), 7.19 (s, 1H), 4.63 (dd,  $J = 14.1, 6.0$  Hz, 1H), 4.17 (dd,  $J = 14.1, 6.5$  Hz, 1H), 1.75 (s, 3H).  $^{13}\text{C}$  NMR (150 MHz,  $\text{CDCl}_3$ )  $\delta$  168.5, 167.4, 152.3, 149.0, 148.5, 140.5 (q,  $J = 33.9$  Hz), 134.5, 133.8, 131.4, 129.8, 129.1, 128.5, 126.7, 125.3, 124.1, 122.6 (q,  $J = 273.5$  Hz), 115.9 (q,  $J = 3.2$  Hz), 114.7 (q,  $J = 3.9$  Hz), 69.4, 46.8, 22.2. HRMS (ESI):  $m/z$ :  $[\text{M} + \text{Na}]^+$  calculated for  $\text{C}_{23}\text{H}_{18}\text{F}_3\text{N}_3\text{NaO}_2$ : 448.1243, found: 448.1249.

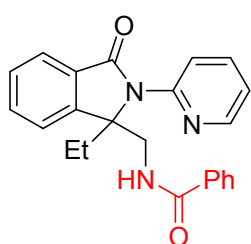

**N-((1-ethyl-3-oxo-2-(pyridin-2-yl)isoindolin-1-yl)methyl)benzamide (4ja).**

The title compound **4ja** was synthesized according to the **3b** and **3c**.

The product **4ja** was isolated as white solid. Yield: **3b**: 84% (31.2 mg); and **3c**: 37% (13.4 mg).  $^1\text{H}$  NMR (600 MHz,  $\text{CDCl}_3$ )  $\delta$  8.50 – 8.49 (m,

1H), 8.07 (d,  $J = 8.3$  Hz, 1H), 7.98 (s, 1H), 7.89 (d,  $J = 7.6$  Hz, 1H), 7.87 – 7.84 (m, 1H), 7.73 – 7.58 (m, 4H), 7.50 – 7.48 (m, 1H), 7.46 – 7.40 (m, 1H), 7.37 – 7.35 (m, 2H), 7.23 – 7.21 (m, 1H), 4.44 (dd,  $J = 14.0, 6.0$  Hz, 1H), 4.15 (dd,  $J = 14.0, 6.3$  Hz, 1H), 2.28 (dd,  $J = 14.6, 7.3$  Hz, 1H), 2.02 (dd,  $J = 14.6, 7.3$  Hz, 1H), 0.42 (t,  $J = 7.3$  Hz, 3H).  $^{13}\text{C}$  NMR (150 MHz,  $\text{CDCl}_3$ )  $\delta$  169.0, 167.3, 151.0, 147.8, 147.0, 138.5, 134.8, 133.3, 131.4, 131.3, 128.8, 128.5, 126.8, 123.9, 122.2, 121.1, 120.3, 72.9, 47.2, 26.4, 7.1. HRMS (ESI):  $m/z$ :  $[\text{M} + \text{Na}]^+$  calculated for  $\text{C}_{23}\text{H}_{21}\text{N}_3\text{NaO}_2$ : 394.1526, found: 394.1527.

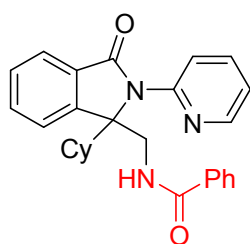

**N-((1-cyclohexyl-3-oxo-2-(pyridin-2-yl)isoindolin-1-yl)methyl)benzamide (4ka)**

The title compound **4ka** was synthesized according to the **3b** and **3c**. The product **4ka** was isolated as white solid. Yield: **3b**: 67% (28.5 mg); and **3c**: <5%.  $^1\text{H}$  NMR (600 MHz,  $\text{CDCl}_3$ )  $\delta$  8.53 – 8.51 (m, 1H), 8.07 (s, 0H),

7.92 – 7.82 (m, 3H), 7.73 (d,  $J = 7.8$  Hz, 1H), 7.64 – 7.62 (m, 1H), 7.58 – 7.53 (m, 2H), 7.48 – 7.45 (m, 1H), 7.43 – 7.37 (m, 1H), 7.34 – 7.31 (m, 2H), 7.29 – 7.24 (m, 2H), 4.52 (dd,  $J = 13.8, 7.5$  Hz, 1H), 4.26 (dd,  $J = 13.8, 4.9$  Hz, 1H), 2.10 – 2.01 (m, 1H), 1.96 – 1.91 (m, 1H), 1.83 – 1.72 (m, 1H), 1.61 – 1.44 (m, 3H), 1.43 – 1.35 (m, 1H), 1.20 – 1.05 (m, 1H), 1.03 – 0.75 (m, 2H), 0.34 – 0.27 (m, 1H).  $^{13}\text{C}$  NMR (150 MHz,  $\text{CDCl}_3$ )  $\delta$  169.1, 167.2, 151.1, 148.3, 145.8, 138.6, 135.0, 132.6, 131.7, 131.2, 128.7, 128.4, 126.8, 123.8, 123.7, 121.9, 121.7, 75.4, 44.8,

42.6, 27.7, 26.8, 26.6, 26.1, 26.0. HRMS (ESI):  $m/z$ :  $[M + Na]^+$  calculated for  $C_{27}H_{27}N_3NaO_2$ : 448.1995, found: 448.1995.

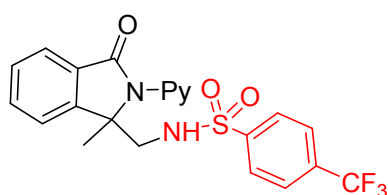

**N-((1-methyl-3-oxo-2-(pyridin-2-yl)isoindolin-1-yl)methyl)-4-(trifluoromethyl)benzenesulfonamide (4aa)**

The title compound **4aa** was synthesized according to the **3d**.

The product **4aa** was isolated as white solid. Yield: 88% (40.7 mg).  $^1H$  NMR (600 MHz,  $CDCl_3$ )  $\delta$  8.41 – 8.37 (m, 1H), 7.99 (d,  $J$  = 8.3 Hz, 1H), 7.81 – 7.77 (m, 2H), 7.68 (d,  $J$  = 8.2 Hz, 2H), 7.58 – 7.53 (m, 3H), 7.45 (t,  $J$  = 7.4 Hz, 1H), 7.37 (d,  $J$  = 7.6 Hz, 1H), 7.20 – 7.16 (m, 1H), 6.67 (t,  $J$  = 6.5 Hz, 1H), 4.18 (dd,  $J$  = 13.4, 6.8 Hz, 1H), 3.51 (dd,  $J$  = 13.4, 6.3 Hz, 1H), 1.55 (s, 3H).  $^{13}C$  NMR (150 MHz,  $CDCl_3$ )  $\delta$  167.7, 150.5, 148.3, 147.5, 144.0, 138.5, 133.7( $q$ ,  $J$  = 32.8 Hz), 133.3, 130.5, 129.1, 127.1, 126.0( $q$ ,  $J$  = 3.7 Hz), 124.4, 123.2( $q$ ,  $J$  = 272.7 Hz), 121.1, 121.0, 119.7, 67.8, 51.1, 22.1. HRMS (ESI):  $m/z$ :  $[M + Na]^+$  calculated for  $C_{22}H_{18}F_3N_3NaSO_3$ : 484.0913, found: 484.0915.

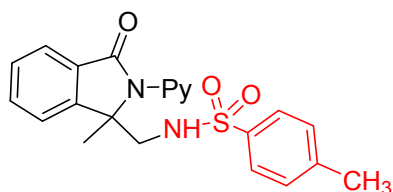

**4-methyl-N-((1-methyl-3-oxo-2-(pyridin-2-yl)isoindolin-1-yl)methyl)benzenesulfonamide (4ab)**

The title compound **4ab** was synthesized according to the **3d**.

The product **4ab** was isolated as white solid. Yield: 95% (38.7 mg).  $^1H$  NMR (600 MHz,  $CDCl_3$ )  $\delta$  8.33 – 8.24 (m, 1H), 7.95 (d,  $J$  = 8.3 Hz, 1H), 7.76 (d,  $J$  = 7.5 Hz, 1H), 7.72 – 7.68 (m, 1H), 7.50 (t,  $J$  = 7.1 Hz, 1H), 7.46 – 7.37 (m, 3H), 7.33 (d,  $J$  = 7.6 Hz, 1H), 7.11 – 7.03 (m, 3H), 6.51 (s, 1H), 3.94 (d,  $J$  = 13.1 Hz, 1H), 3.32 (d,  $J$  = 13.1 Hz, 1H), 2.29 (s, 3H), 1.49 (s, 3H).  $^{13}C$  NMR (150 MHz,  $CDCl_3$ )  $\delta$  167.9, 150.5, 148.6, 147.4, 142.9, 138.4, 133.3, 130.5, 129.5, 128.9, 126.8, 126.4, 124.3, 121.3, 120.8, 119.6, 67.9, 51.1, 22.2, 21.5. HRMS (ESI):  $m/z$ :  $[M + Na]^+$  calculated for  $C_{22}H_{21}N_3NaSO_3$ : 430.1196, found: 430.1197.

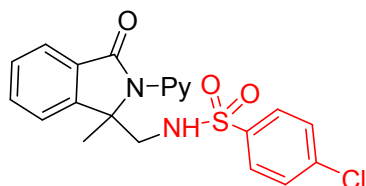

**4-chloro-N-((1-methyl-3-oxo-2-(pyridin-2-yl)isoindolin-1-yl)methyl)benzenesulfonamide (4ac)**

The title compound **4ac** was synthesized according to the **3d**.

The product **4ac** was isolated as white solid. Yield: 98% (41.8 mg).  $^1H$  NMR (600 MHz,  $CDCl_3$ )  $\delta$  8.38 – 8.36 (m, 1H), 8.01 (d,  $J$  = 8.3 Hz, 1H), 7.86 – 7.76 (m, 3H), 7.59 – 7.56 (m, 1H), 7.52 – 7.48 (m, 3H), 7.38 (d,  $J$  = 7.6 Hz, 1H), 7.28 (d,  $J$  = 2.0 Hz, 1H), 7.18 – 7.16 (m, 1H), 6.54 (t,  $J$  = 6.6 Hz, 1H), 4.13 (dd,  $J$  = 13.2, 6.9 Hz, 1H), 3.46 (dd,  $J$



= 13.3, 6.3 Hz, 1H), 1.56 (s, 3H).  $^{13}\text{C}$  NMR (150 MHz,  $\text{CDCl}_3$ )  $\delta$  167.8, 148.4, 147.5, 138.6, 138.4, 133.4, 130.5, 129.3, 129.1, 129.0, 128.2, 127.9, 124.4, 121.1, 121.0, 119.6, 67.8, 51.0, 22.2. HRMS (ESI):  $m/z$ :  $[\text{M} + \text{Na}]^+$  calculated for  $\text{C}_{21}\text{H}_{18}\text{ClN}_3\text{NaSO}_3$ : 450.0650, found: 450.0654.

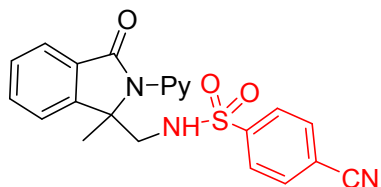

**4-cyano-N-((1-methyl-3-oxo-2-(pyridin-2-yl)isoindolin-1-yl)methyl)benzenesulfonamide (4ad)**

The title compound **4ad** was synthesized according to the **3d**.

The product **4ad** was isolated as white solid. Yield: 71% (29.8 mg).  $^1\text{H}$  NMR (600 MHz,  $\text{CDCl}_3$ )  $\delta$  8.39 – 8.38 (m, 1H), 7.99 (d,  $J$  = 8.3 Hz, 1H), 7.84 – 7.78 (m, 2H), 7.66 (d,  $J$  = 8.4 Hz, 2H), 7.62 – 7.56 (m, 3H), 7.51 – 7.48 (m, 1H), 7.41 (d,  $J$  = 7.6 Hz, 1H), 7.21 – 7.18 (m, 1H), 6.85 (t,  $J$  = 6.4 Hz, 1H), 4.18 (dd,  $J$  = 13.5, 7.0 Hz, 1H), 3.50 (dd,  $J$  = 13.4, 5.9 Hz, 1H), 1.56 (s, 3H).  $^{13}\text{C}$  NMR (150 MHz,  $\text{CDCl}_3$ )  $\delta$  167.6, 150.4, 148.2, 147.4, 144.7, 138.6, 133.4, 132.6, 130.5, 129.2, 127.2, 124.4, 121.2, 121.1, 119.7, 117.3, 115.8, 67.8, 51.2, 22.0. HRMS (ESI):  $m/z$ :  $[\text{M} + \text{Na}]^+$  calculated for  $\text{C}_{22}\text{H}_{18}\text{N}_4\text{NaSO}_3$ : 441.0992, found: 441.0995.

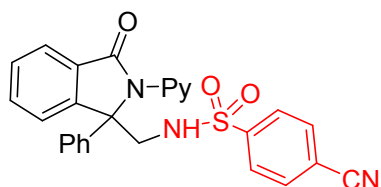

**4-cyano-N-((3-oxo-1-phenyl-2-(pyridin-2-yl)isoindolin-1-yl)methyl)benzenesulfonamide (4ae)**

The title compound **4ae** was synthesized according to the **3d**.

The product **4ae** was isolated as white solid. Yield: 88% (40.7 mg).  $^1\text{H}$  NMR (600 MHz,  $\text{CDCl}_3$ )  $\delta$  8.19 – 8.17 (m, 1H), 8.01 (d,  $J$  = 8.3 Hz, 1H), 7.85 – 7.83 (m, 1H), 7.76 – 7.73 (m, 1H), 7.66 (d,  $J$  = 8.3 Hz, 2H), 7.60 (d,  $J$  = 8.4 Hz, 2H), 7.51 – 7.43 (m, 2H), 7.24 – 7.13 (m, 6H), 7.10 – 7.05 (m, 1H), 6.70 (t,  $J$  = 6.4 Hz, 1H), 4.90 (dd,  $J$  = 13.0, 6.2 Hz, 1H), 4.14 (dd,  $J$  = 13.0, 6.6 Hz, 1H).  $^{13}\text{C}$  NMR (150 MHz,  $\text{CDCl}_3$ )  $\delta$  168.5, 150.4, 148.4, 147.5, 144.5, 138.4, 137.9, 133.6, 132.6, 130.0, 129.1, 128.9, 128.0, 127.3, 125.8, 124.4, 122.2, 121.0, 119.6, 117.3, 115.8, 72.1, 49.3. HRMS (ESI):  $m/z$ :  $[\text{M} + \text{Na}]^+$  calculated for  $\text{C}_{27}\text{H}_{20}\text{N}_4\text{NaSO}_3$ : 503.1148, found: 503.1151.

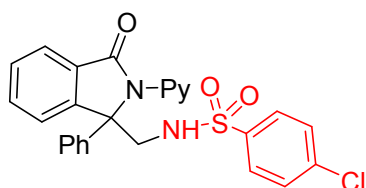

**4-chloro-N-((3-oxo-1-phenyl-2-(pyridin-2-yl)isoindolin-1-yl)methyl)benzenesulfonamide (4af)**

The title compound **4af** was synthesized according to the **3d**.

The product **4af** was isolated as white solid. Yield: 88% (40.7

mg).  $^1\text{H NMR}$  (600 MHz,  $\text{CDCl}_3$ )  $\delta$  8.20 – 8.13 (m, 1H), 8.04 (d,  $J = 8.3$  Hz, 1H), 7.90 – 7.83 (m, 1H), 7.78 – 7.70 (m, 1H), 7.54 – 7.49 (m, 2H), 7.49 – 7.43 (m, 2H), 7.29 (d,  $J = 2.7$  Hz, 2H), 7.24 – 7.15 (m, 5H), 7.14 – 7.11 (m, 1H), 7.06 – 7.04 (m, 1H), 6.36 (t,  $J = 6.6$  Hz, 1H), 4.84 (dd,  $J = 12.8, 6.0$  Hz, 1H), 4.12 (dd,  $J = 12.8, 7.0$  Hz, 1H).  $^{13}\text{C NMR}$  (150 MHz,  $\text{CDCl}_3$ )  $\delta$  168.6, 156.8, 150.4, 148.5, 147.5, 138.7, 138.5, 138.2, 133.5, 130.0, 129.1, 128.9, 128.8, 128.3, 127.9, 125.8, 124.4, 122.1, 120.9, 119.5, 72.1, 49.0. HRMS (ESI):  $m/z$ :  $[\text{M} + \text{Na}]^+$  calculated for  $\text{C}_{26}\text{H}_{20}\text{ClN}_3\text{NaSO}_3$ : 512.0806, found: 512.0803.

## 6. X-Ray Crystallographic Data of the Complex 5

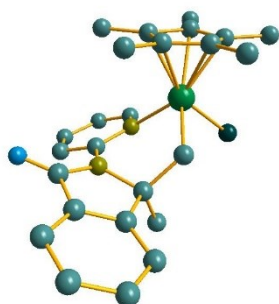

**Table S2 Crystal data and structure refinement for CCDC 1957959.**

|                     |                                                    |
|---------------------|----------------------------------------------------|
| Identification code | CCDC 1957959                                       |
| Empirical formula   | $\text{C}_{25}\text{H}_{28}\text{ClN}_2\text{ORh}$ |
| Formula weight      | 510.85                                             |

|                                             |                                                                |
|---------------------------------------------|----------------------------------------------------------------|
| Temperature/K                               | 153.02                                                         |
| Crystal system                              | orthorhombic                                                   |
| Space group                                 | Pbca                                                           |
| a/Å                                         | 11.9749(4)                                                     |
| b/Å                                         | 15.7608(5)                                                     |
| c/Å                                         | 23.8262(7)                                                     |
| $\alpha$ /°                                 | 90                                                             |
| $\beta$ /°                                  | 90                                                             |
| $\gamma$ /°                                 | 90                                                             |
| Volume/Å <sup>3</sup>                       | 4496.8(2)                                                      |
| Z                                           | 8                                                              |
| $\rho_{\text{calc}}$ /cm <sup>3</sup>       | 1.509                                                          |
| $\mu$ /mm <sup>-1</sup>                     | 7.375                                                          |
| F(000)                                      | 2096.0                                                         |
| Crystal size/mm <sup>3</sup>                | 0.5 × 0.4 × 0.3                                                |
| Radiation                                   | CuK $\alpha$ ( $\lambda$ = 1.54178)                            |
| 2 $\Theta$ range for data collection/°      | 7.42 to 136.596                                                |
| Index ranges                                | -14 ≤ h ≤ 14, -18 ≤ k ≤ 18, -28 ≤ l ≤ 28                       |
| Reflections collected                       | 76351                                                          |
| Independent reflections                     | 4120 [ $R_{\text{int}}$ = 0.0405, $R_{\text{sigma}}$ = 0.0133] |
| Data/restraints/parameters                  | 4120/41/373                                                    |
| Goodness-of-fit on F <sup>2</sup>           | 1.100                                                          |
| Final R indexes [ $I \geq 2\sigma(I)$ ]     | $R_1$ = 0.0237, $wR_2$ = 0.0577                                |
| Final R indexes [all data]                  | $R_1$ = 0.0241, $wR_2$ = 0.0580                                |
| Largest diff. peak/hole / e Å <sup>-3</sup> | 0.40/-0.71                                                     |

## 7. References

1. X. Kou, Y. Li, L. Wu, X. Zhang, G. Yang and W. Zhang, *Org. Lett.* 2015, **17**, 5566.
2. X. Hao, B. Chen, L. Ren, L. Li, X. Yang, J. Gong, J. Niu and M. Song, *Org. Lett.* 2014, **16**, 1104.
3. a) Yang, G.; Shen, C.; Zhang, W. *Angew. Chem. Int. Ed.* 2012, **51**, 9141. b) Bunescu, A.; Wang, Q.; Zhu, J. *Chem.-Eur. J.* 2014, **20**, 14633.
4. J. Park, J. Lee and S. Chang, *Angew. Chem., Int. Ed.* 2017, **56**, 4256.

## **8. NMR Spectral for new compounds**

**<sup>1</sup>H NMR Spectra of Compound 1a**

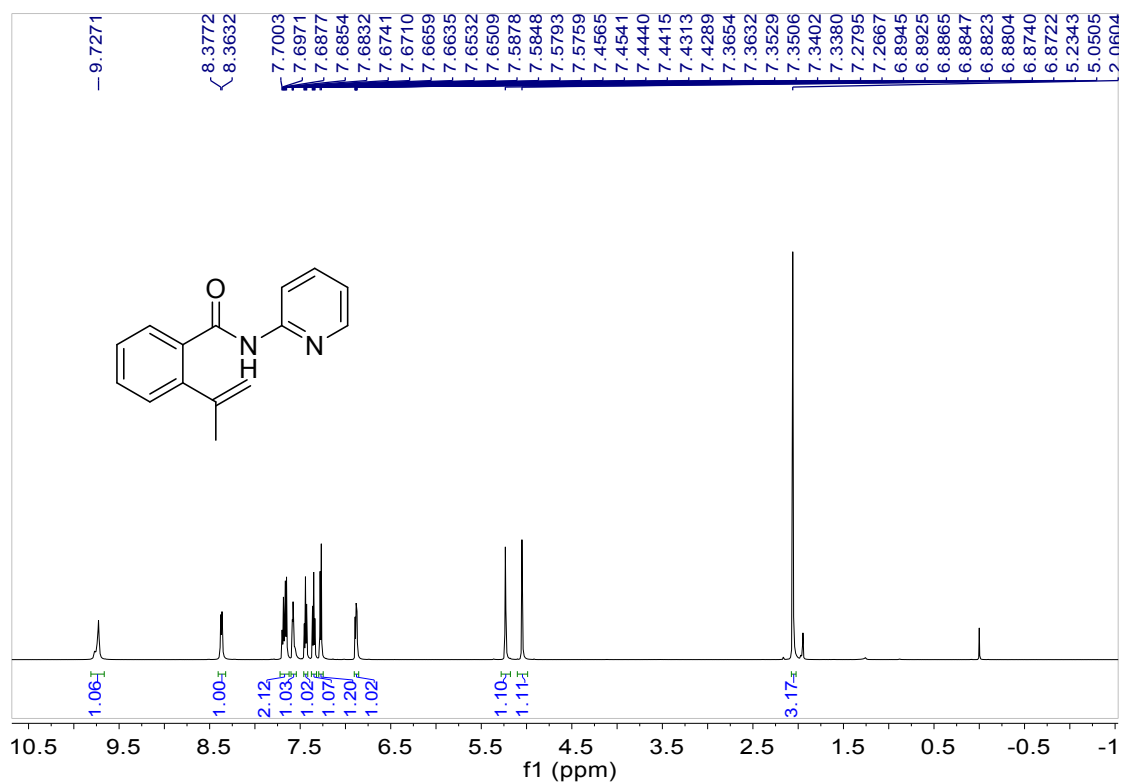

<sup>13</sup>C NMR Spectra of Compound 1a

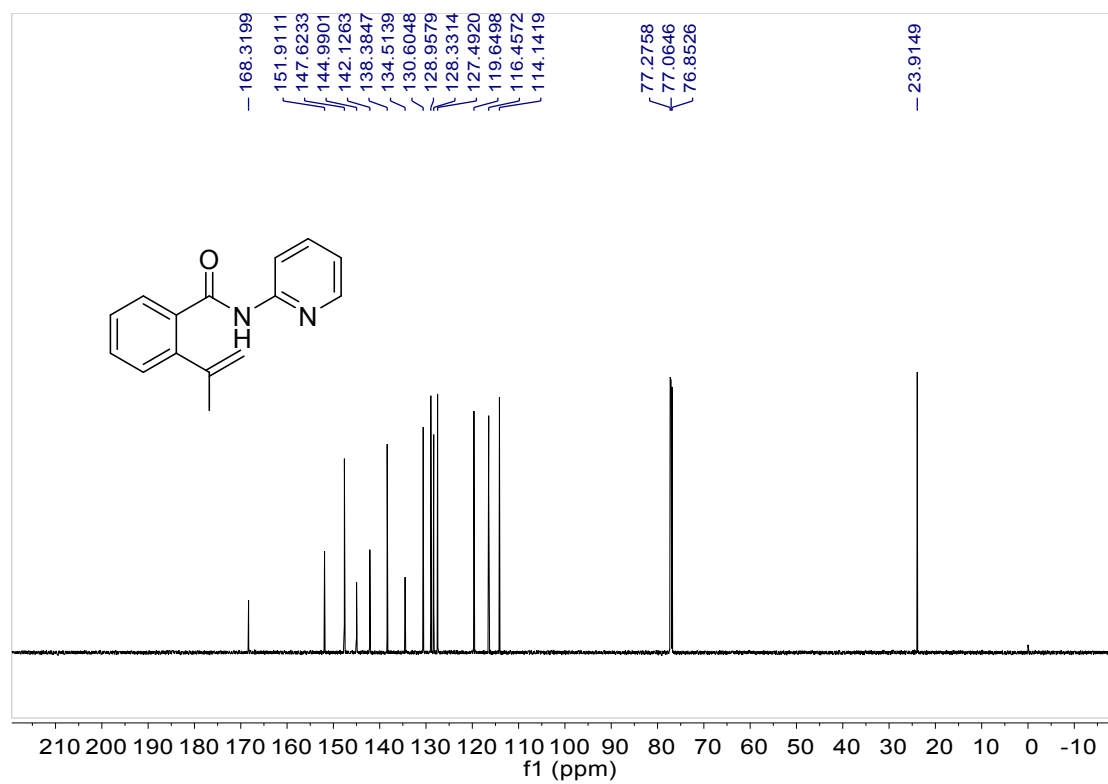

<sup>1</sup>H NMR Spectra of Compound 1b

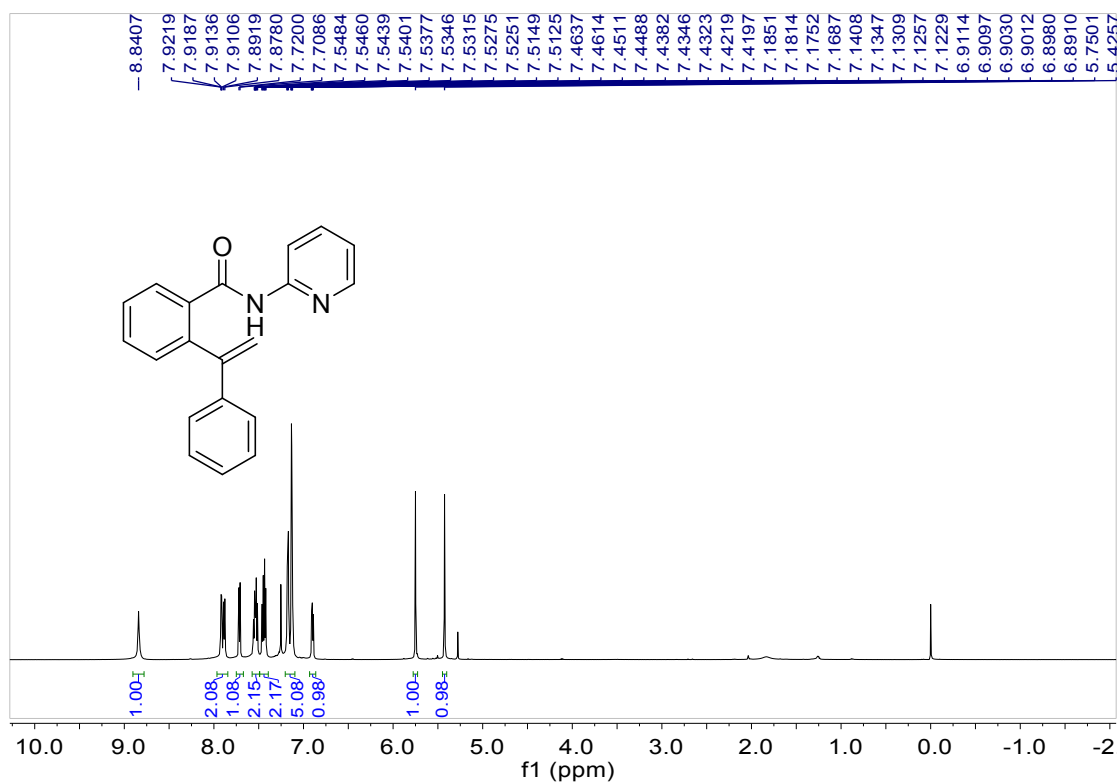

<sup>13</sup>C NMR Spectra of Compound 1b

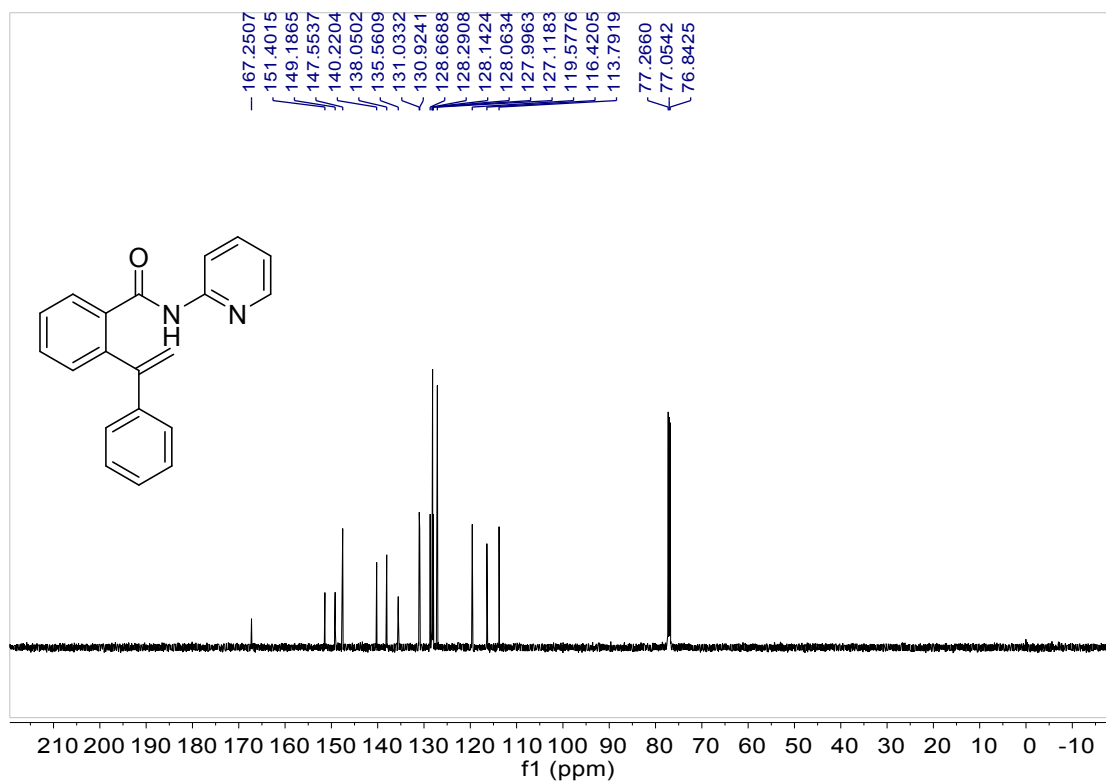

<sup>1</sup>H NMR Spectra of Compound 1c

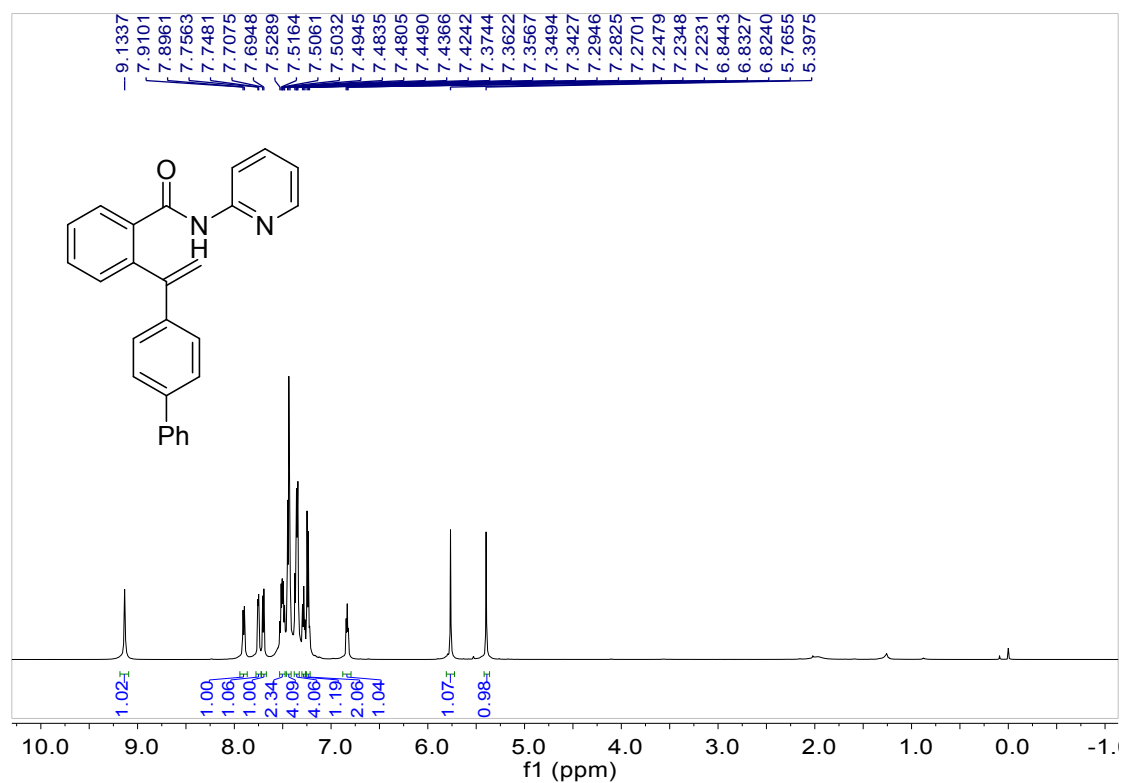

<sup>13</sup>C NMR Spectra of Compound 1c

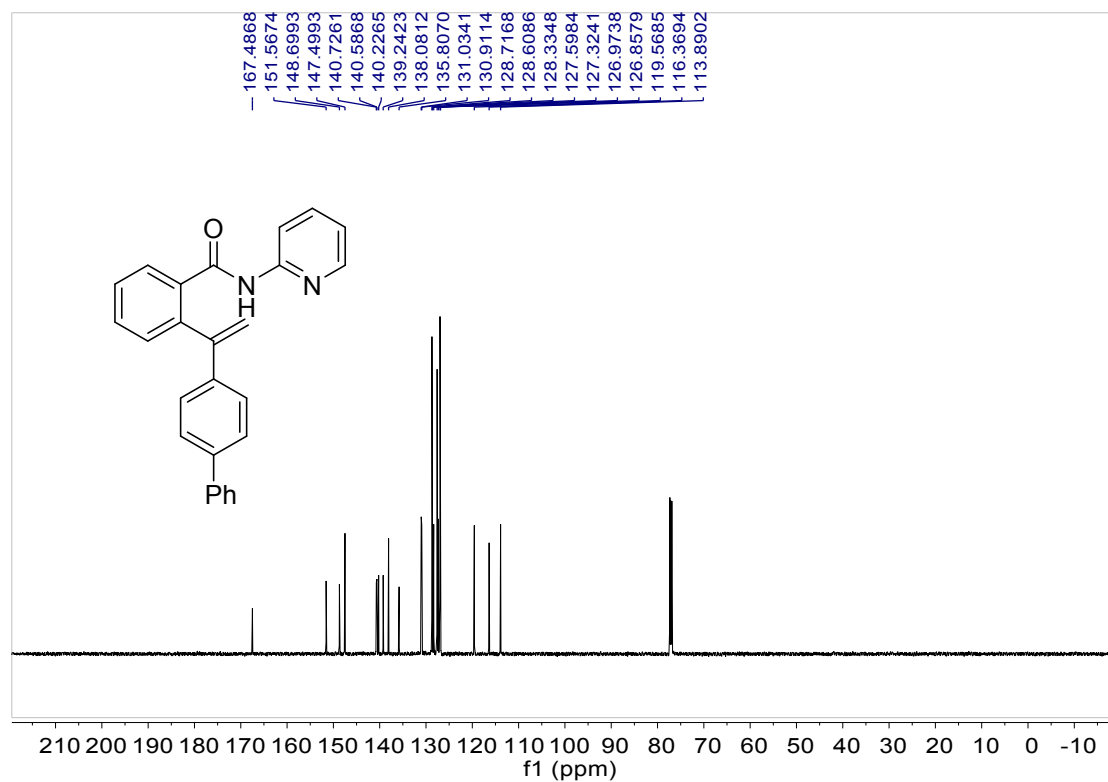

<sup>1</sup>H NMR Spectra of Compound 1d

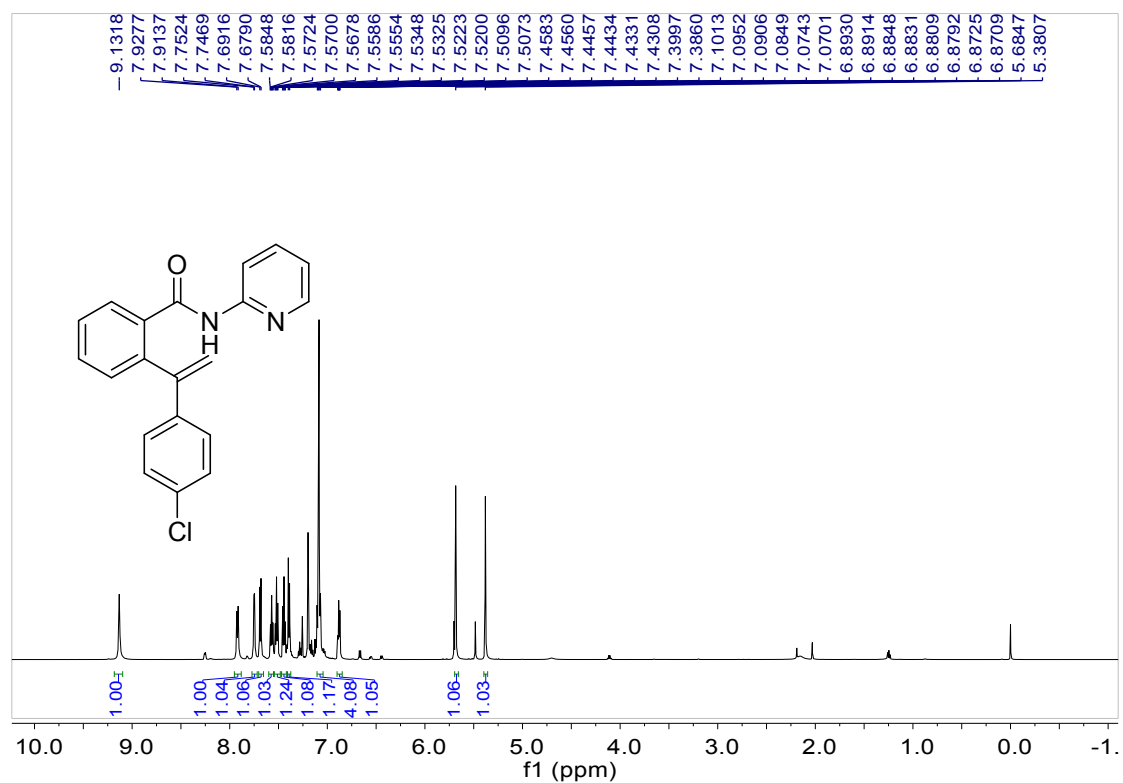

<sup>13</sup>C NMR Spectra of Compound 1d

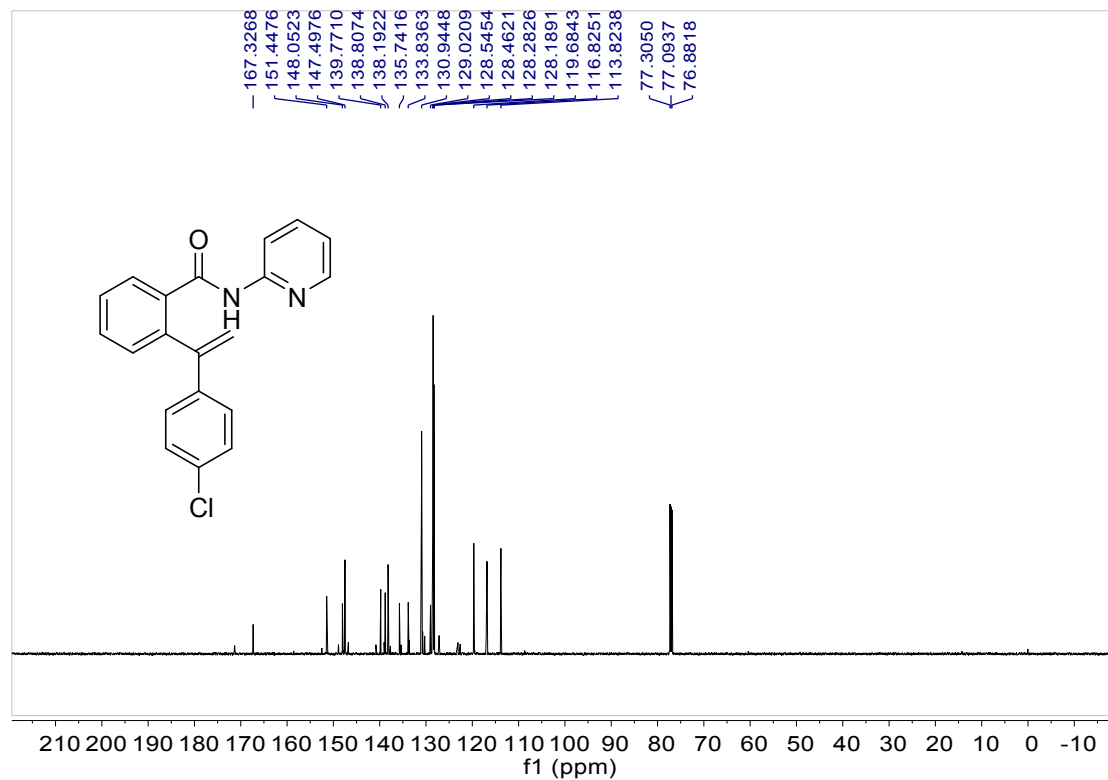

<sup>1</sup>H NMR Spectra of Compound 1e



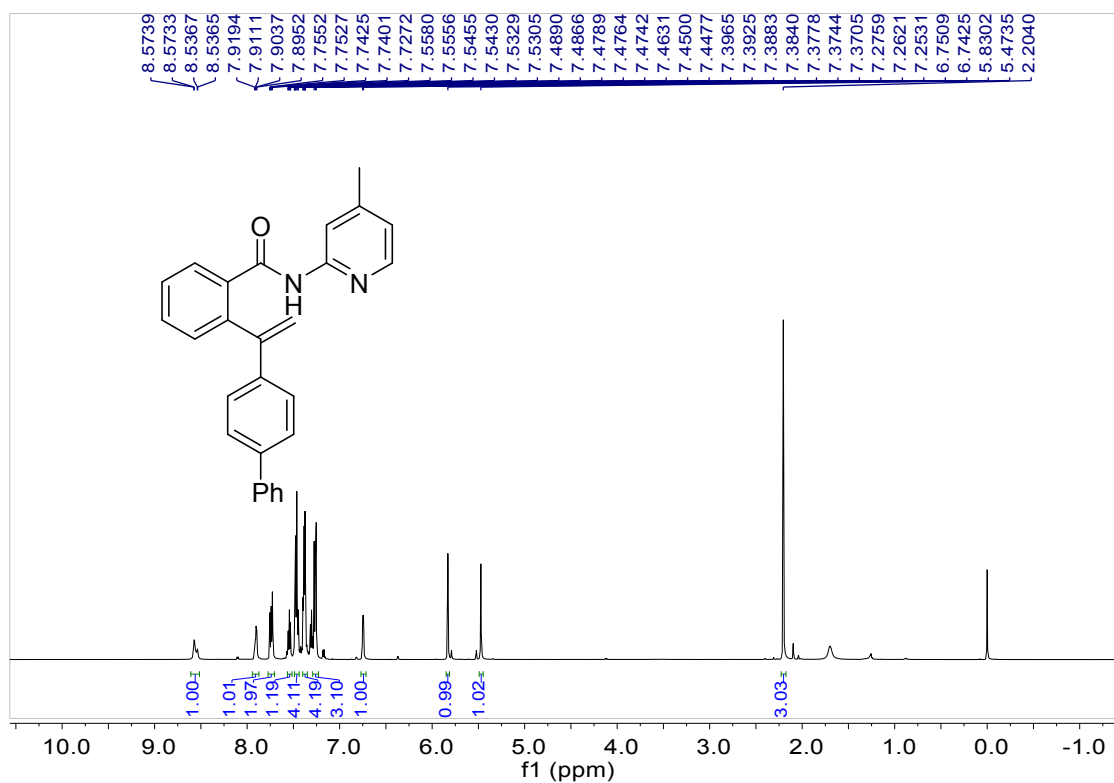

<sup>13</sup>C NMR Spectra of Compound 1e

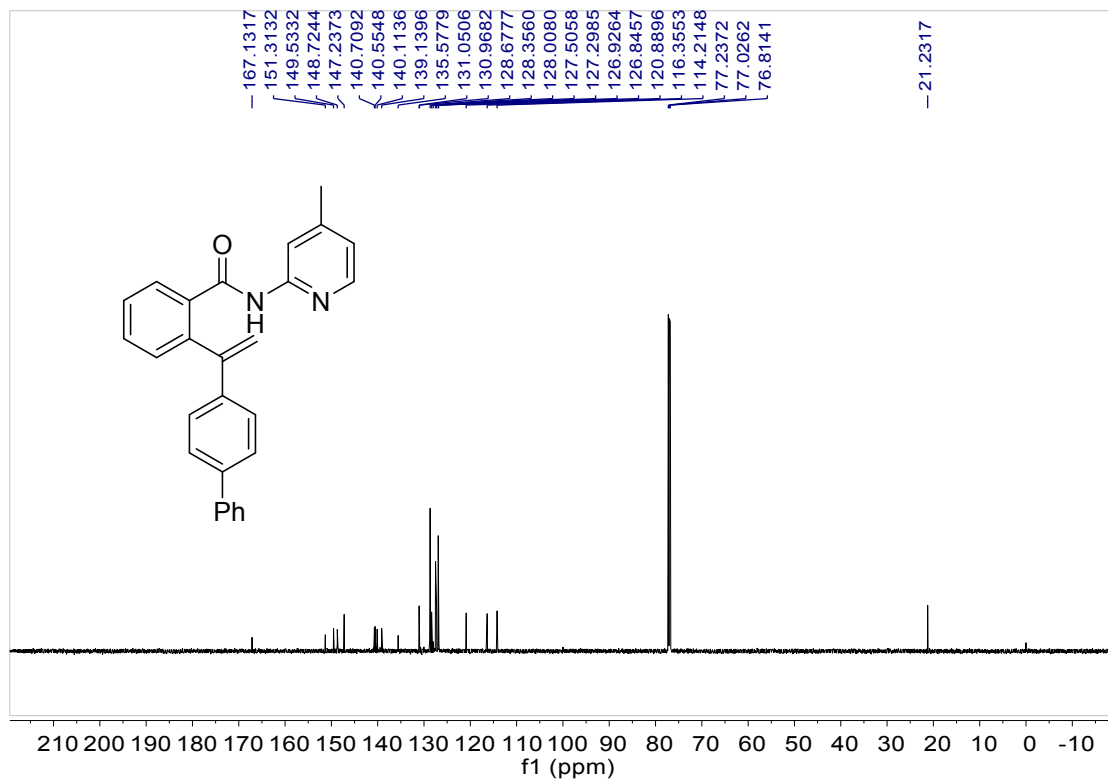

<sup>1</sup>H NMR Spectra of Compound 1f

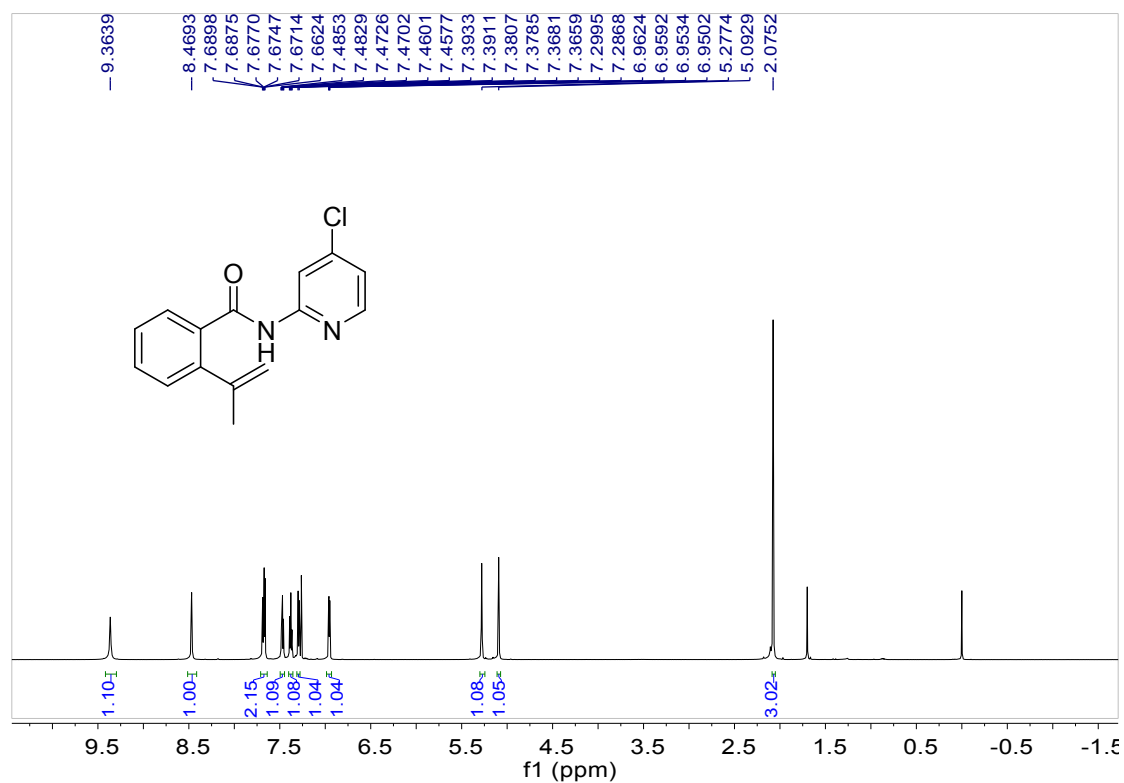

<sup>13</sup>C NMR Spectra of Compound 1f

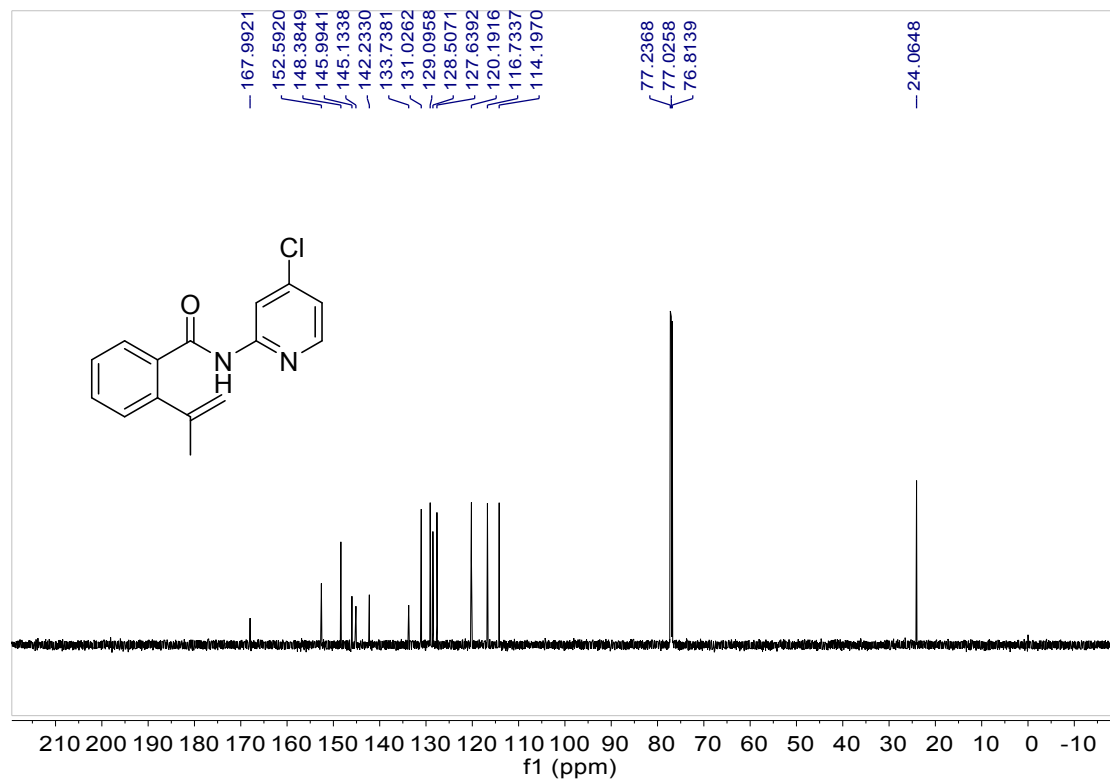

<sup>1</sup>H NMR Spectra of Compound 1g

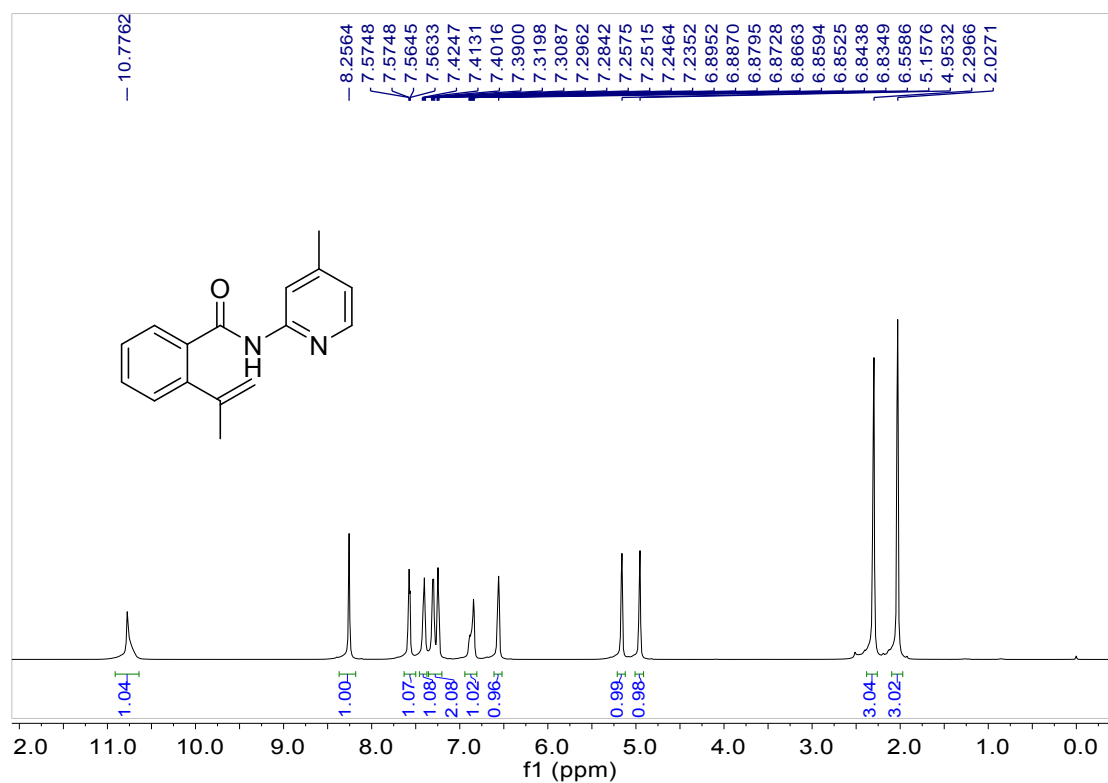

<sup>13</sup>C NMR Spectra of Compound **1g**

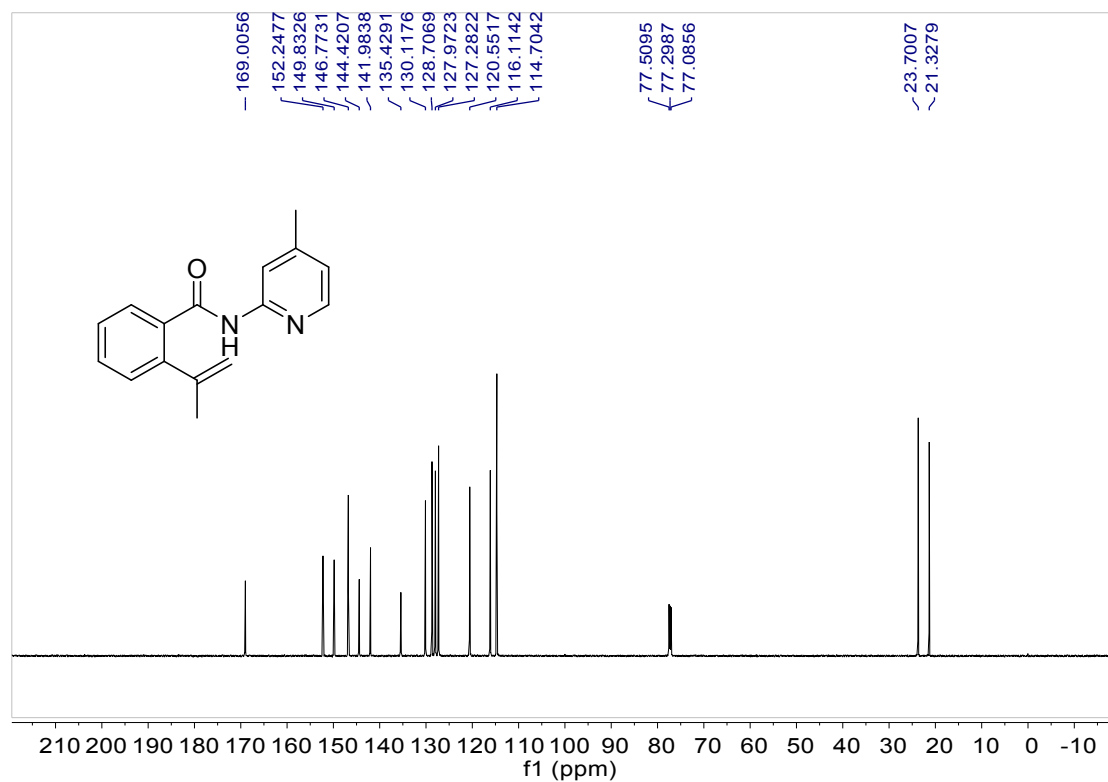

<sup>1</sup>H NMR Spectra of Compound **1h**

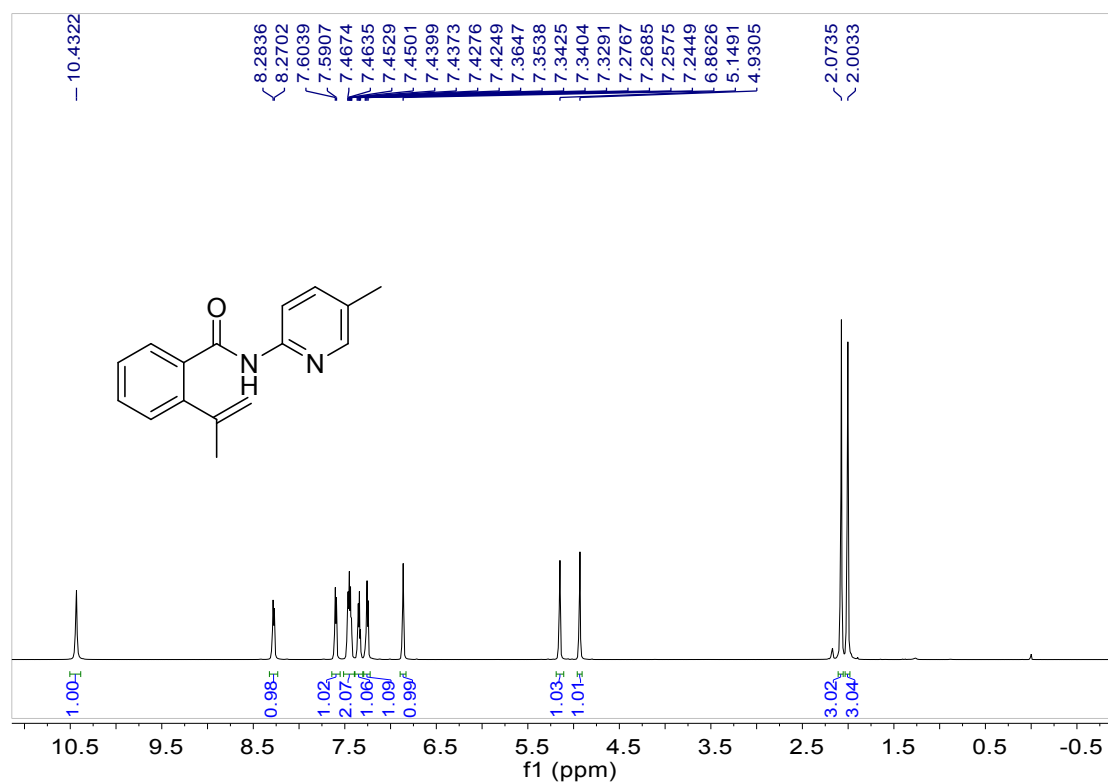

<sup>13</sup>C NMR Spectra of Compound 1h

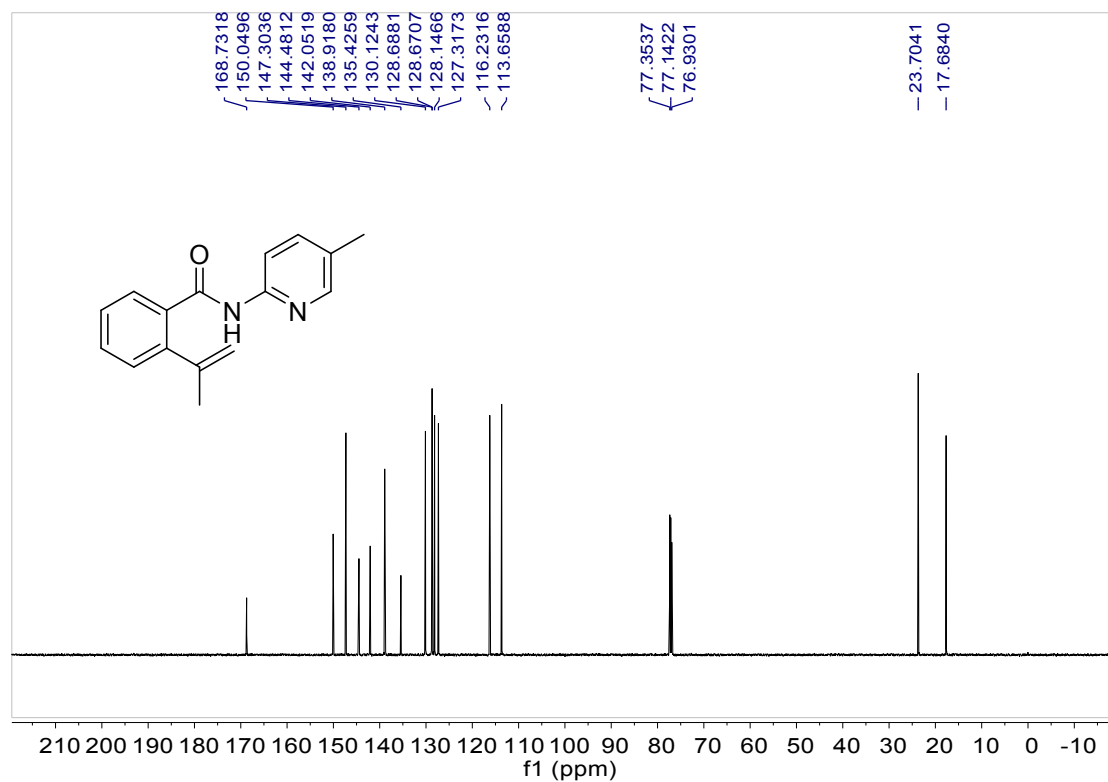

<sup>1</sup>H NMR Spectra of Compound 1i

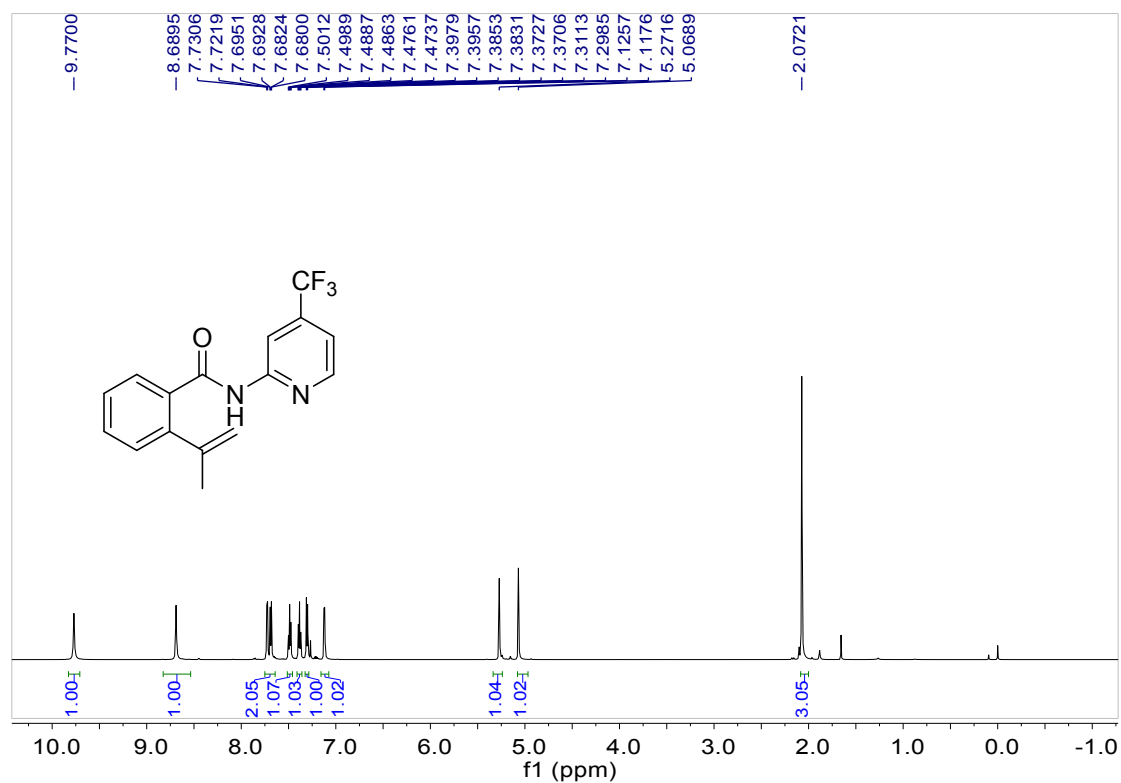

<sup>13</sup>C NMR Spectra of Compound **1i**

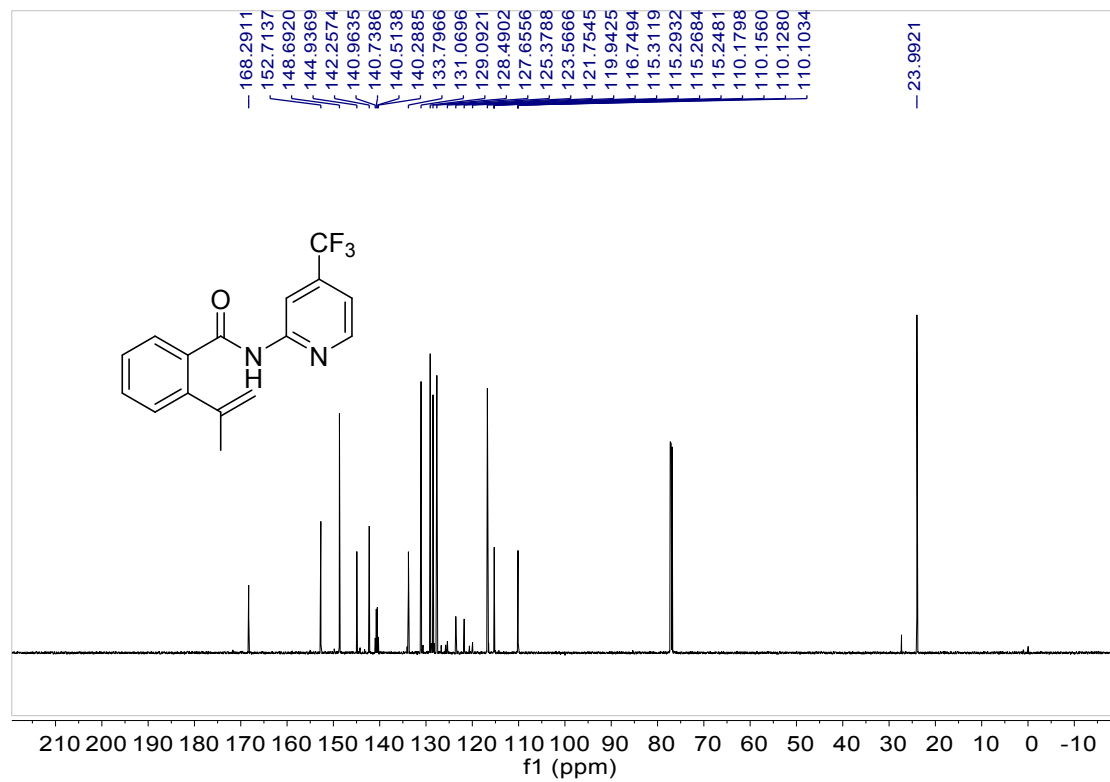

<sup>1</sup>H NMR Spectra of Compound **1j**

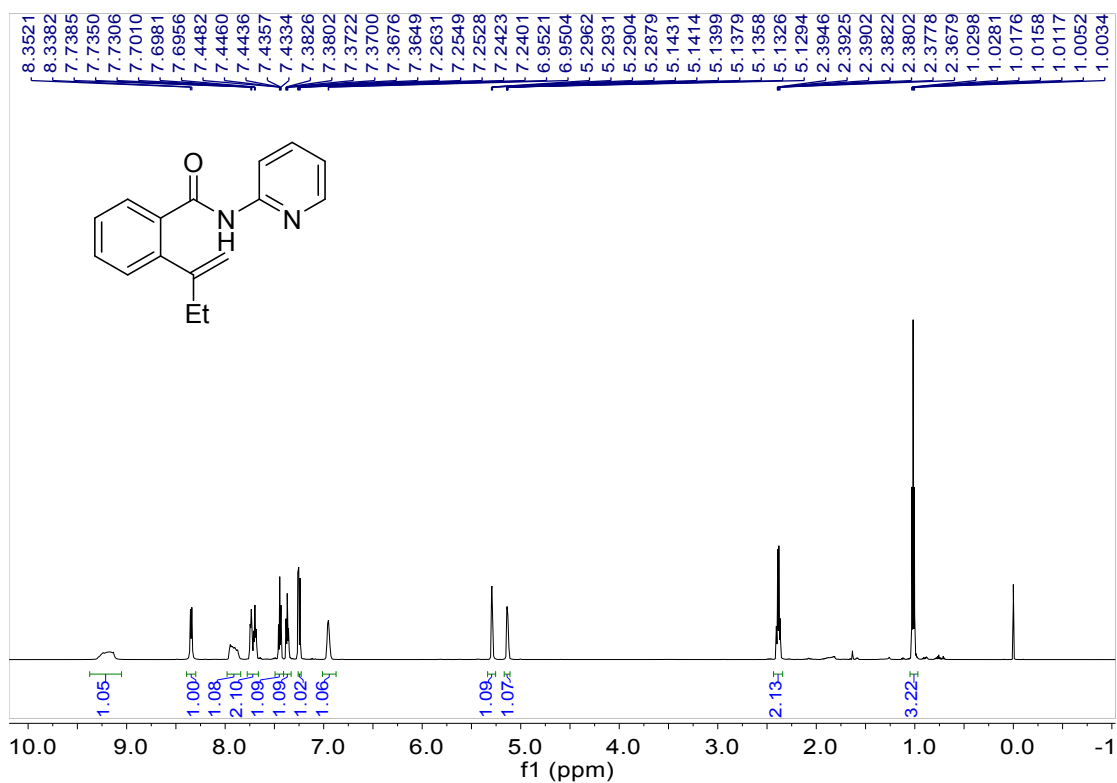

**<sup>13</sup>C NMR Spectra of Compound 1j**

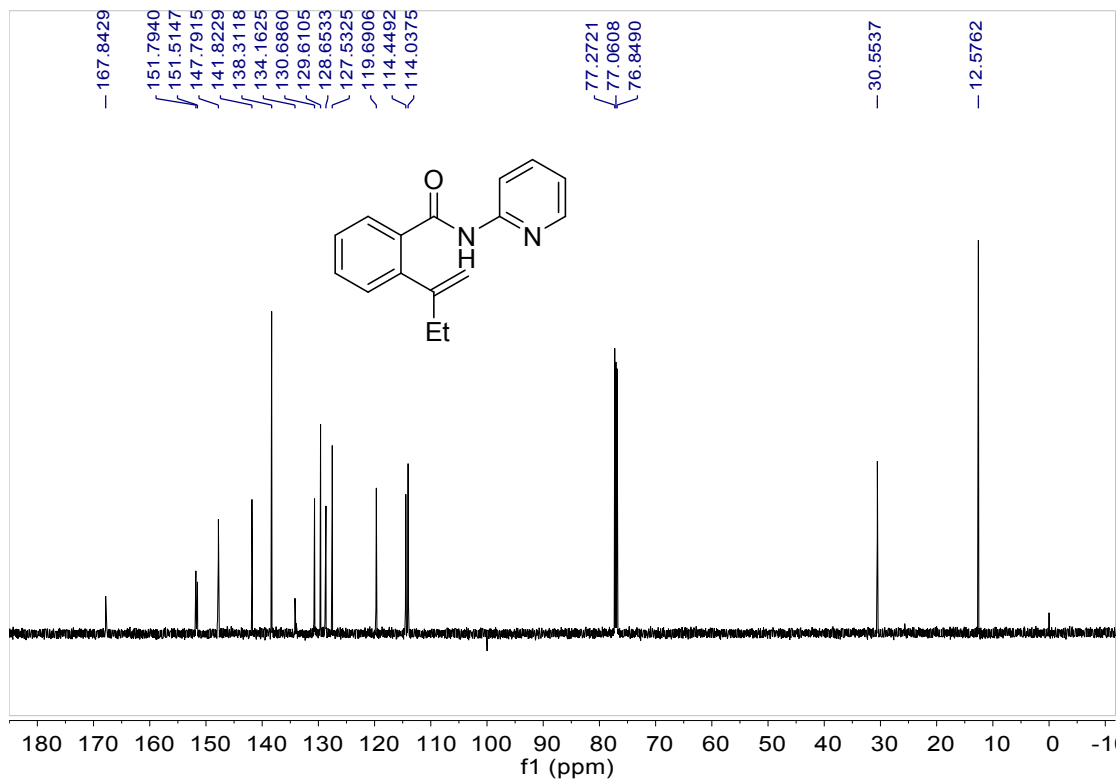

**<sup>1</sup>H NMR Spectra of Compound 1k**

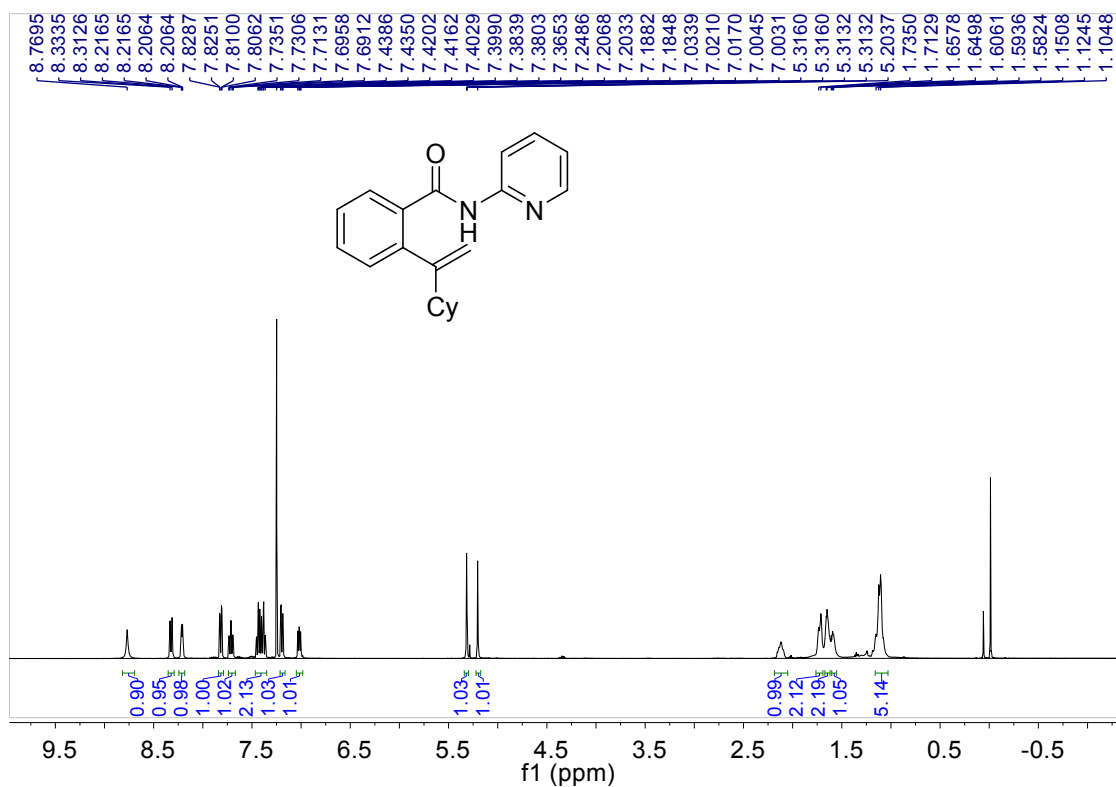

**<sup>13</sup>C NMR Spectra of Compound 1k**

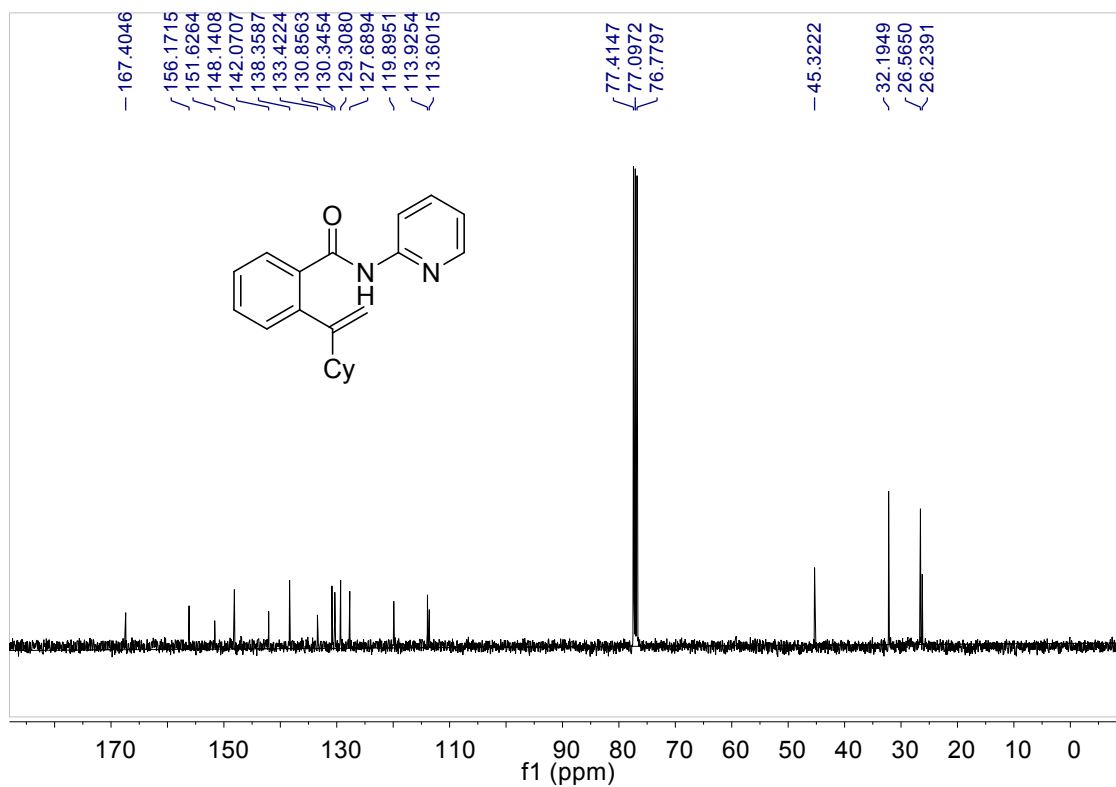

**<sup>1</sup>H NMR Spectra of Compound 1l**

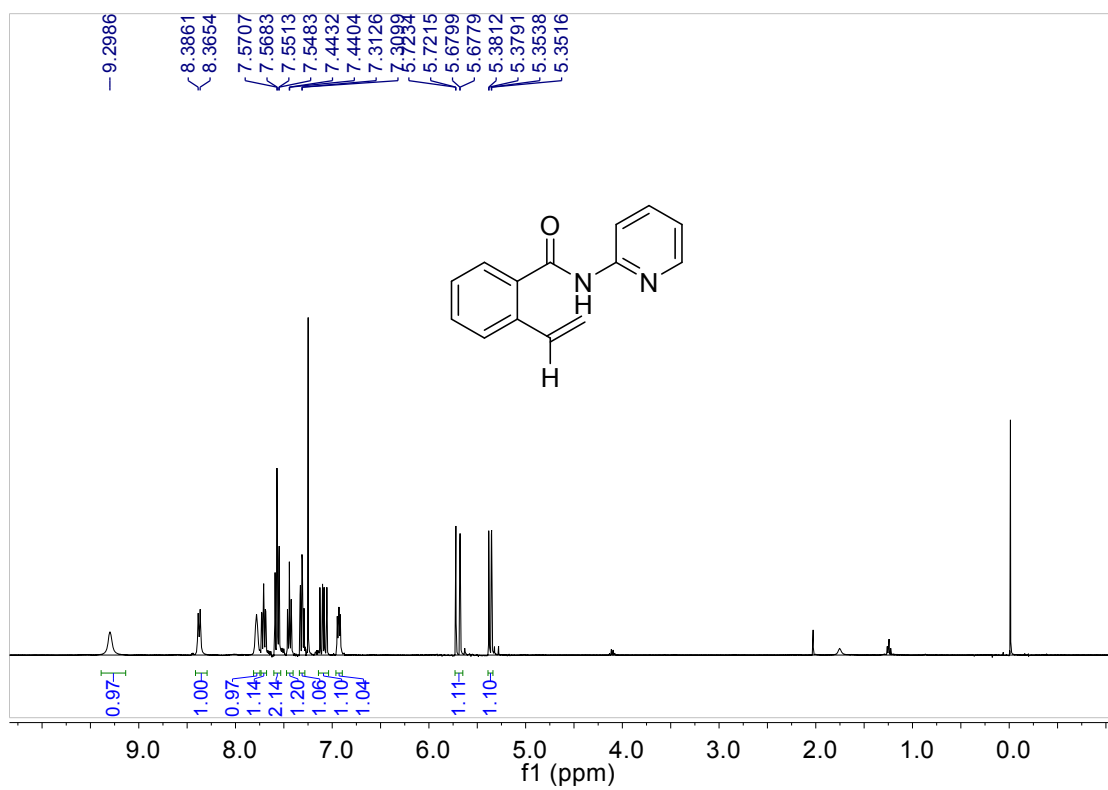

**<sup>13</sup>C NMR Spectra of Compound 11**

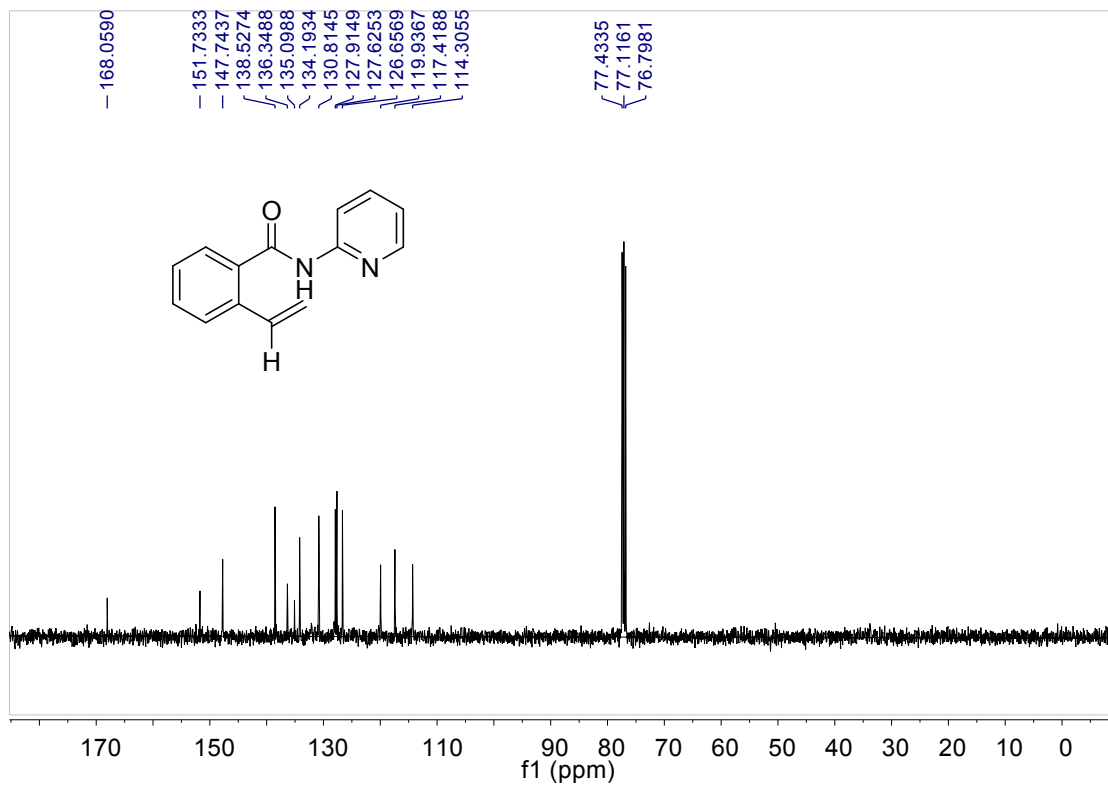

**<sup>1</sup>H NMR Spectra of Compound 1m**



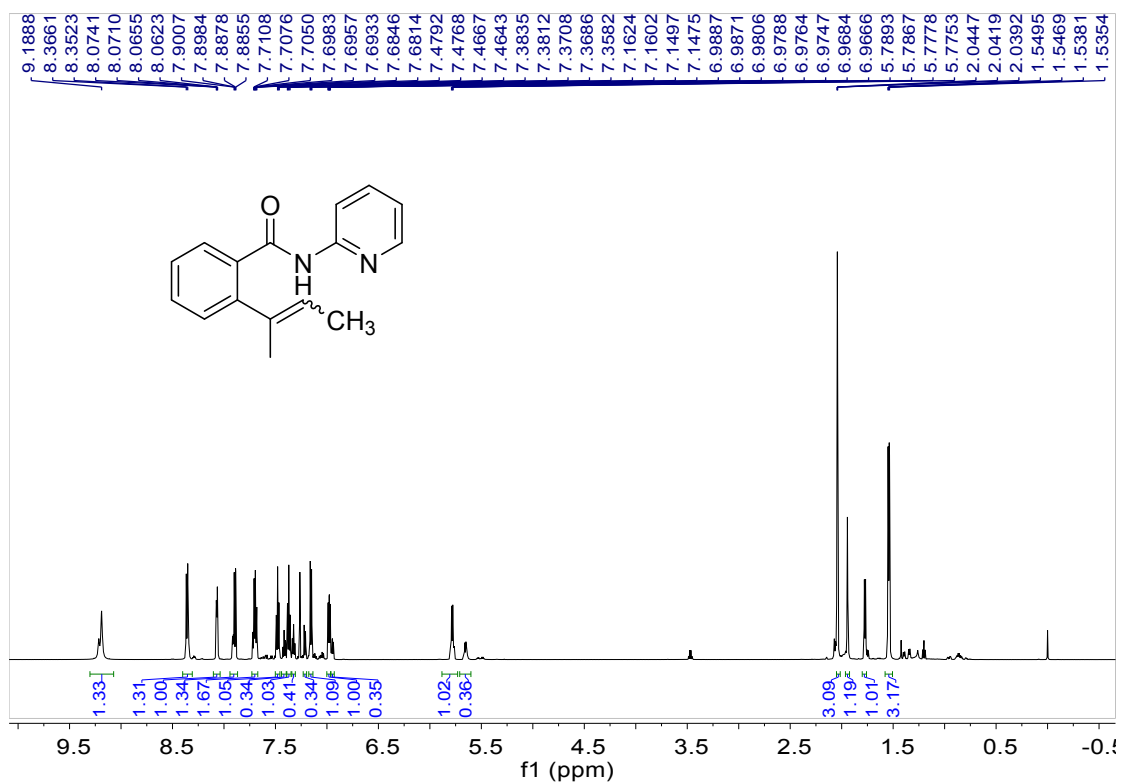

**<sup>13</sup>C NMR Spectra of Compound 1m**

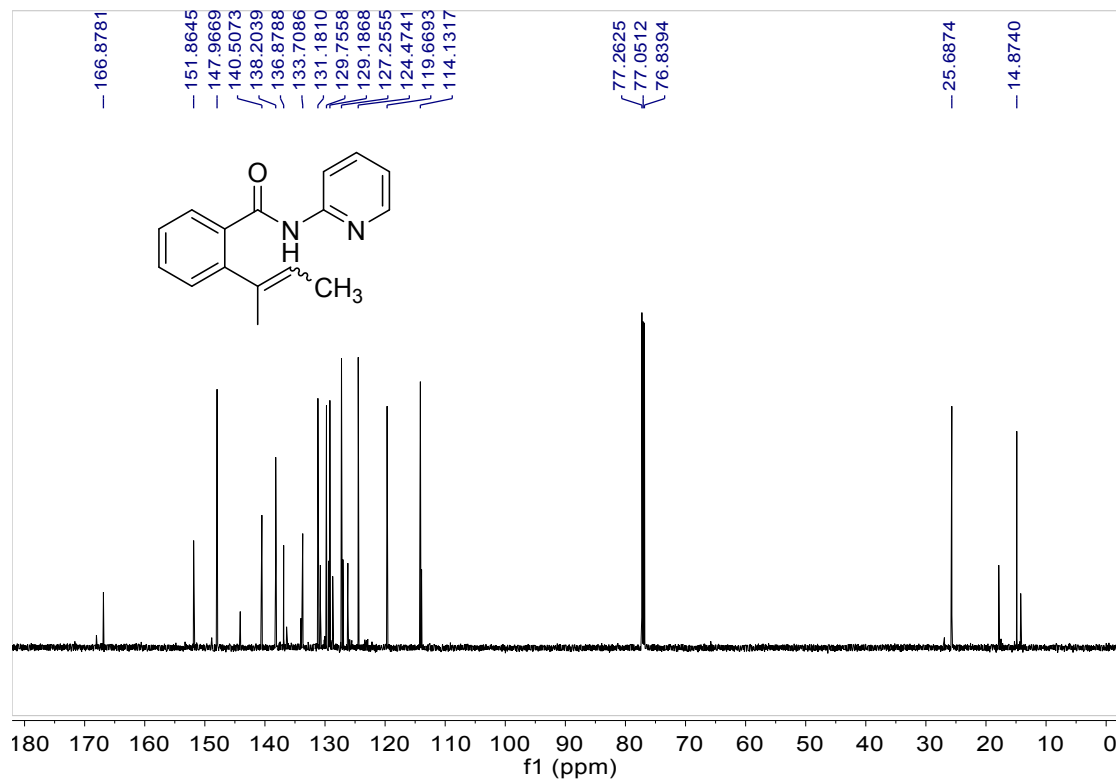

**<sup>1</sup>H NMR Spectra of Rh(III)-Complex 5**

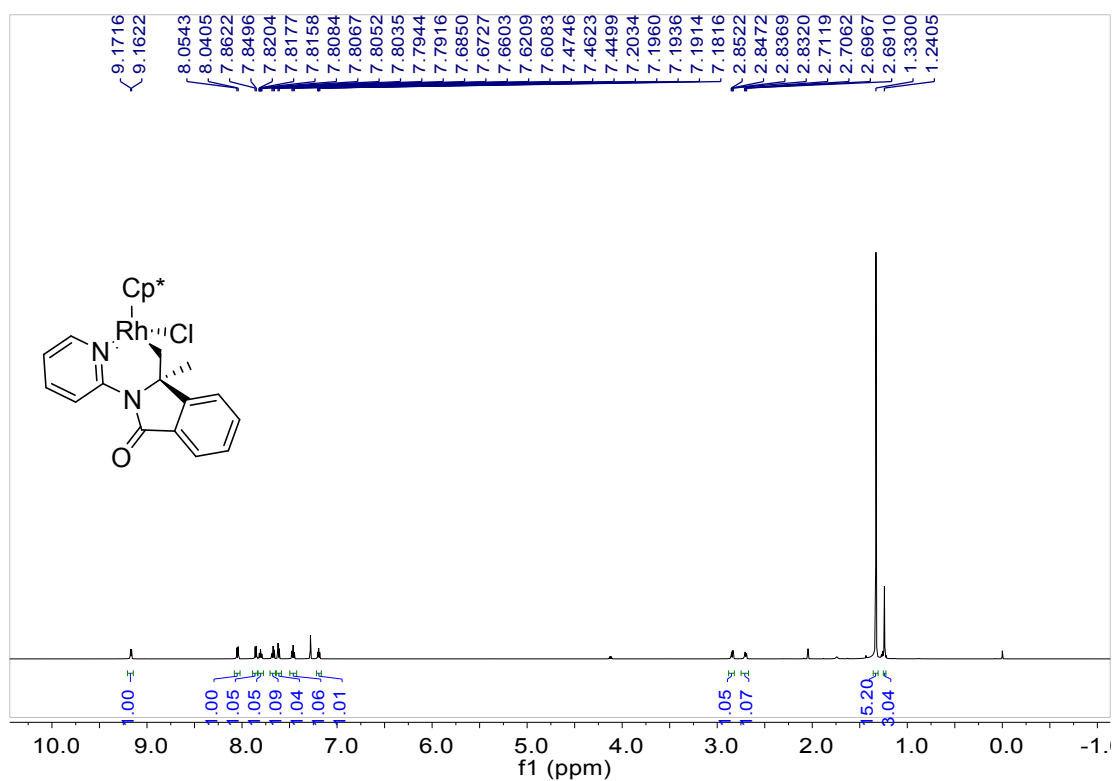

### <sup>13</sup>C NMR Spectra of Rh(III)-Complex 5

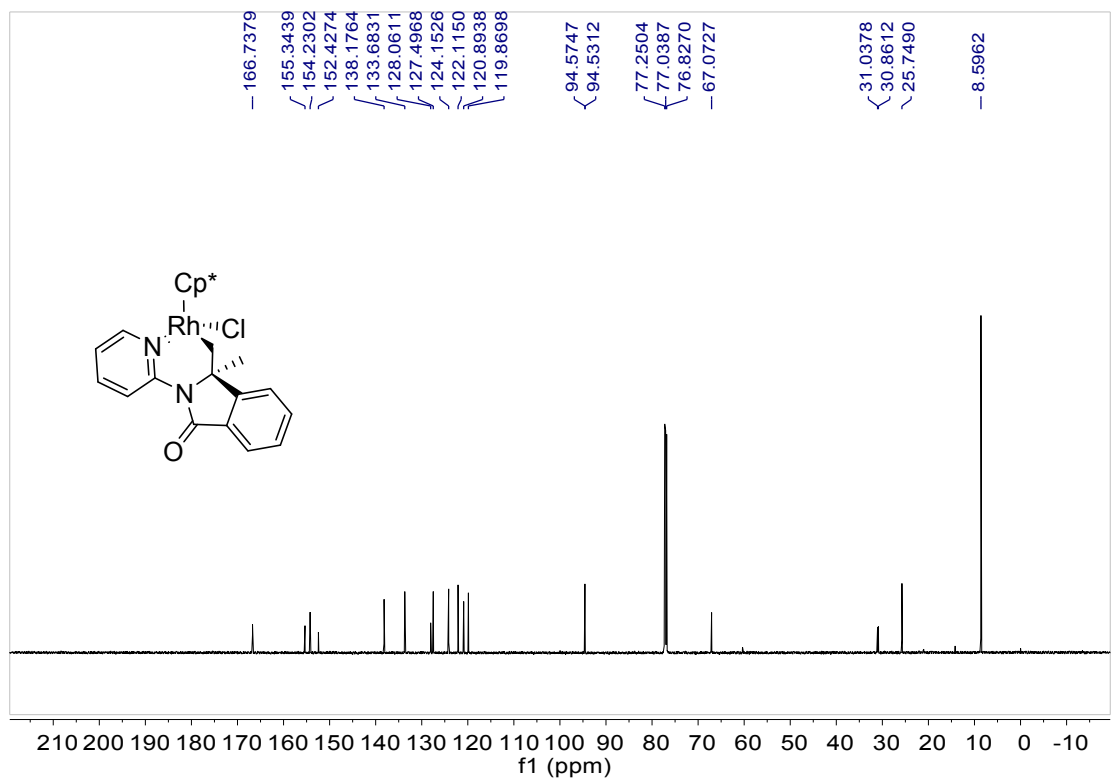

### <sup>1</sup>H NMR Spectra of Compound 3aa

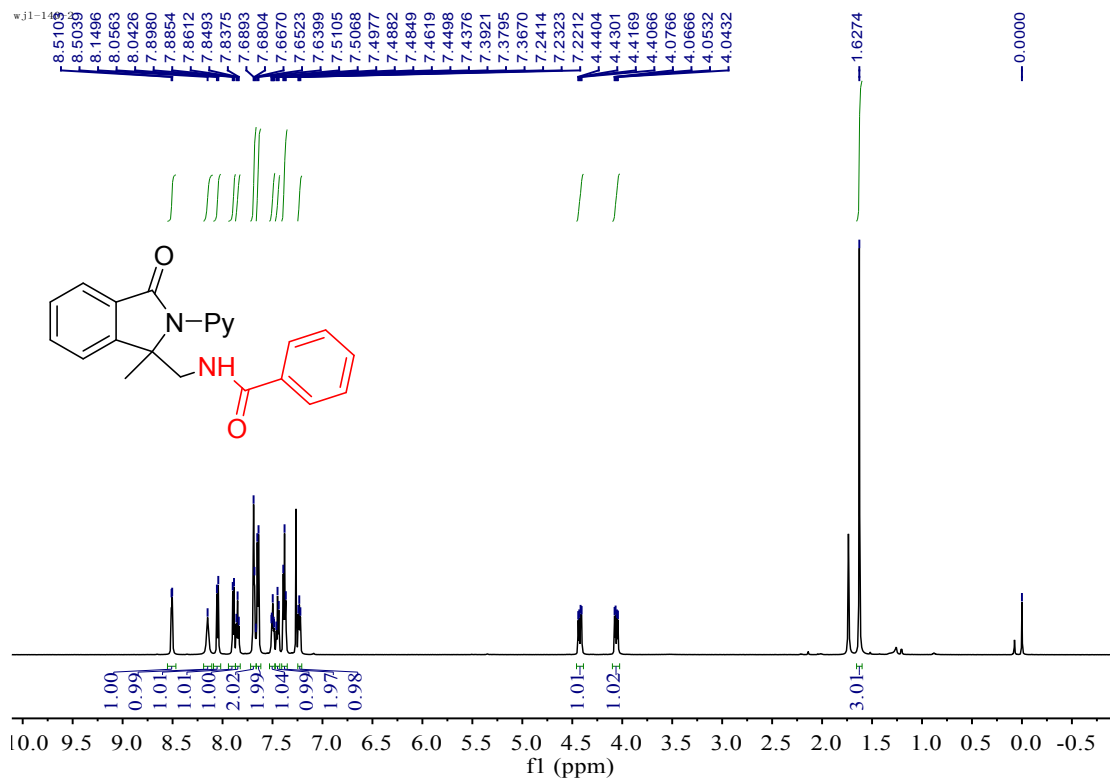

### <sup>13</sup>C NMR Spectra of Compound **3aa**

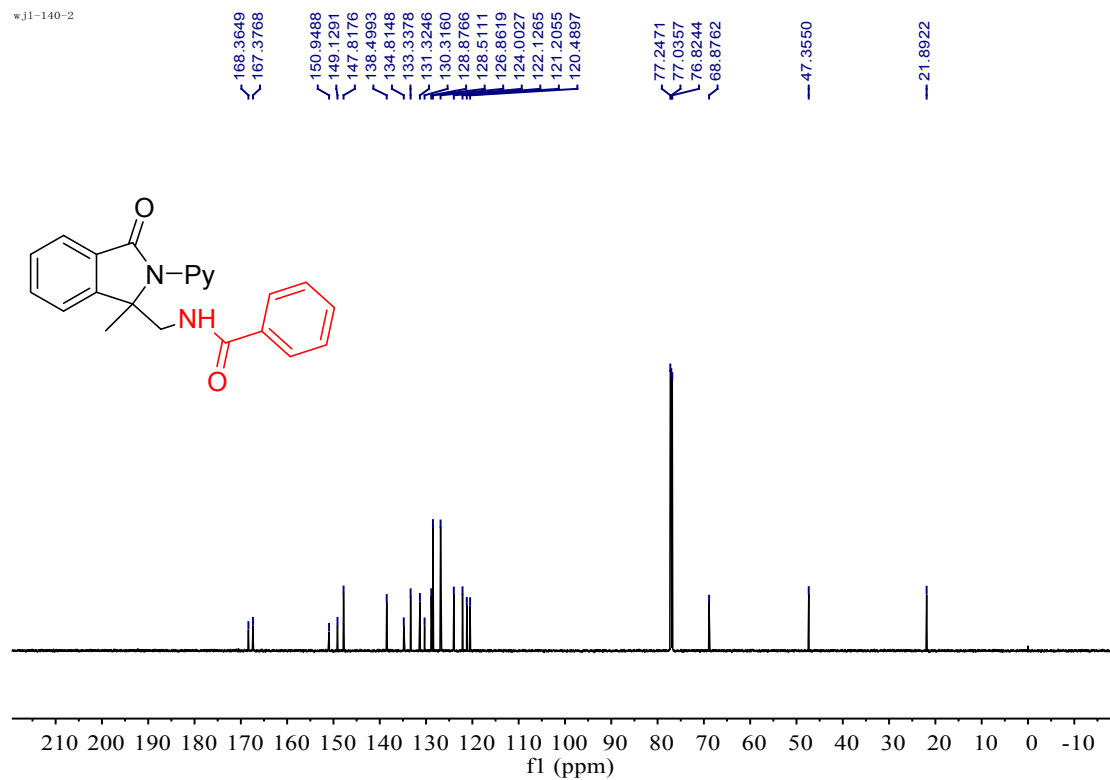

### <sup>1</sup>H NMR Spectra of Compound **3ab**

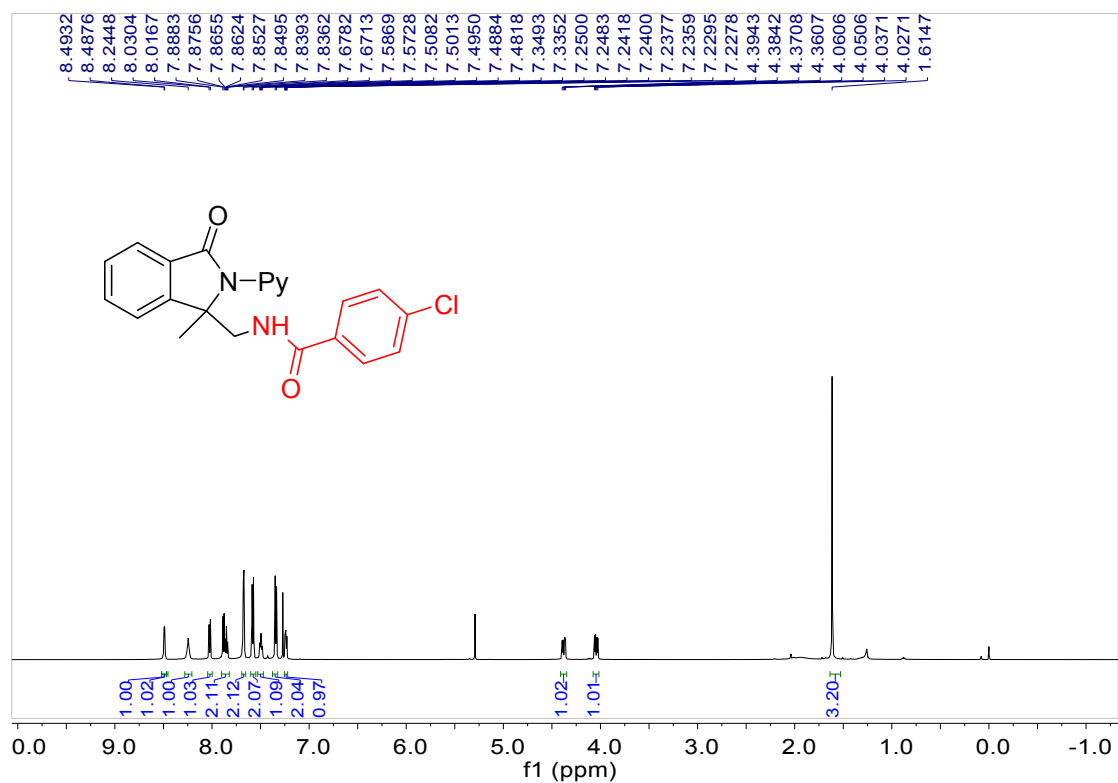

<sup>13</sup>C NMR Spectra of Compound 3ab

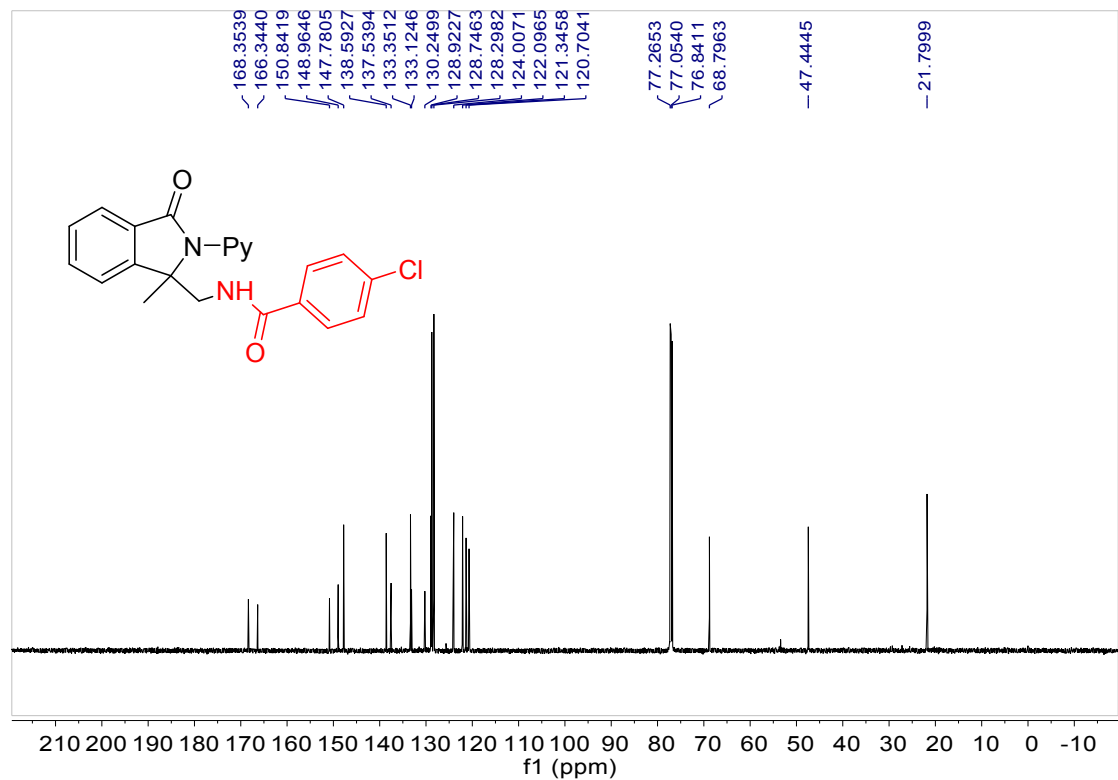

<sup>1</sup>H NMR Spectra of Compound 3ac

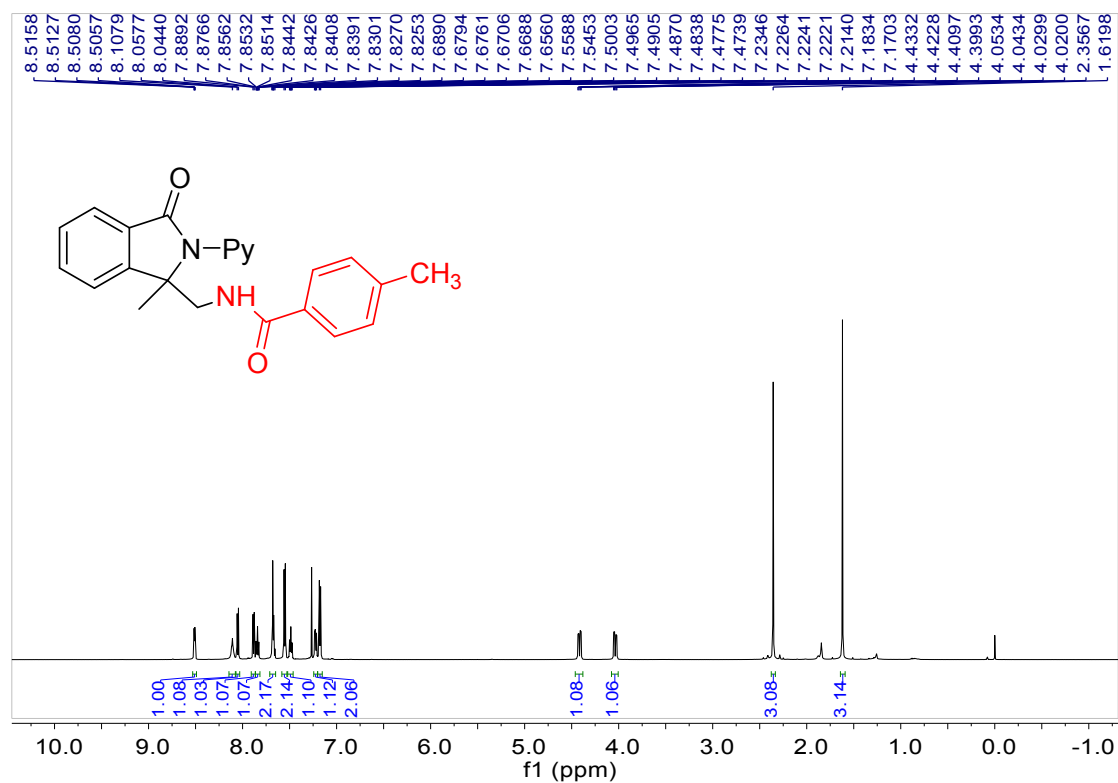

<sup>13</sup>C NMR Spectra of Compound 3ac

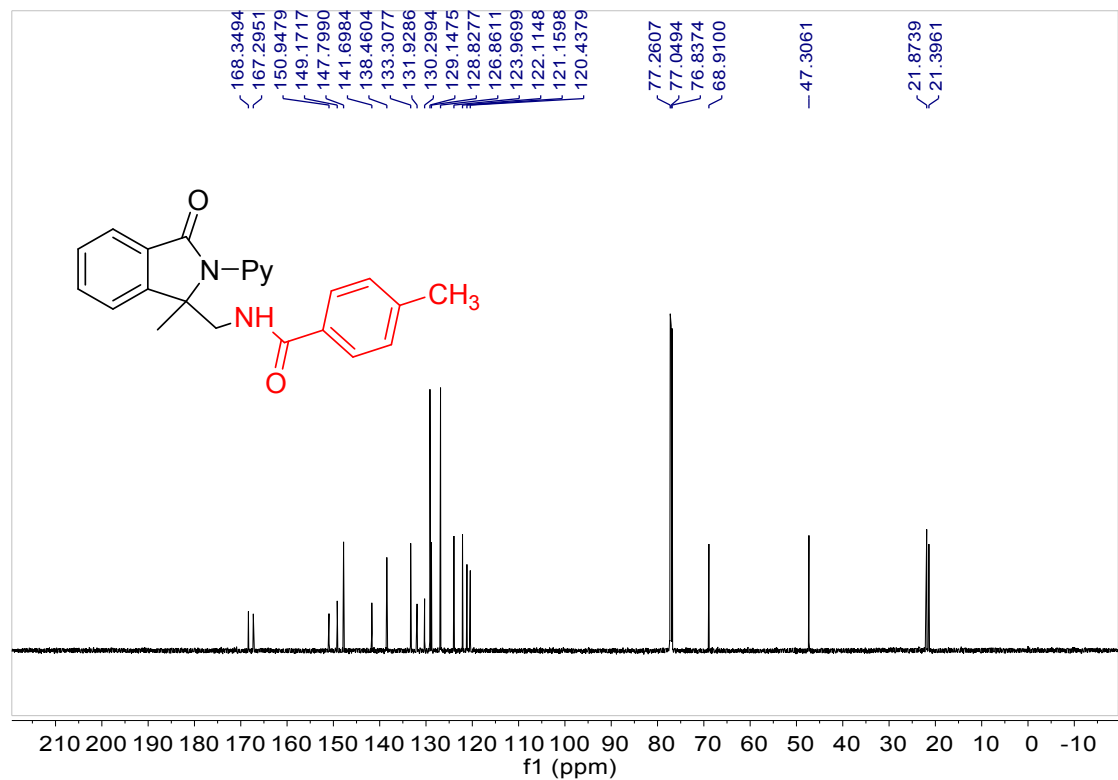

<sup>1</sup>H NMR Spectra of Compound 3ad

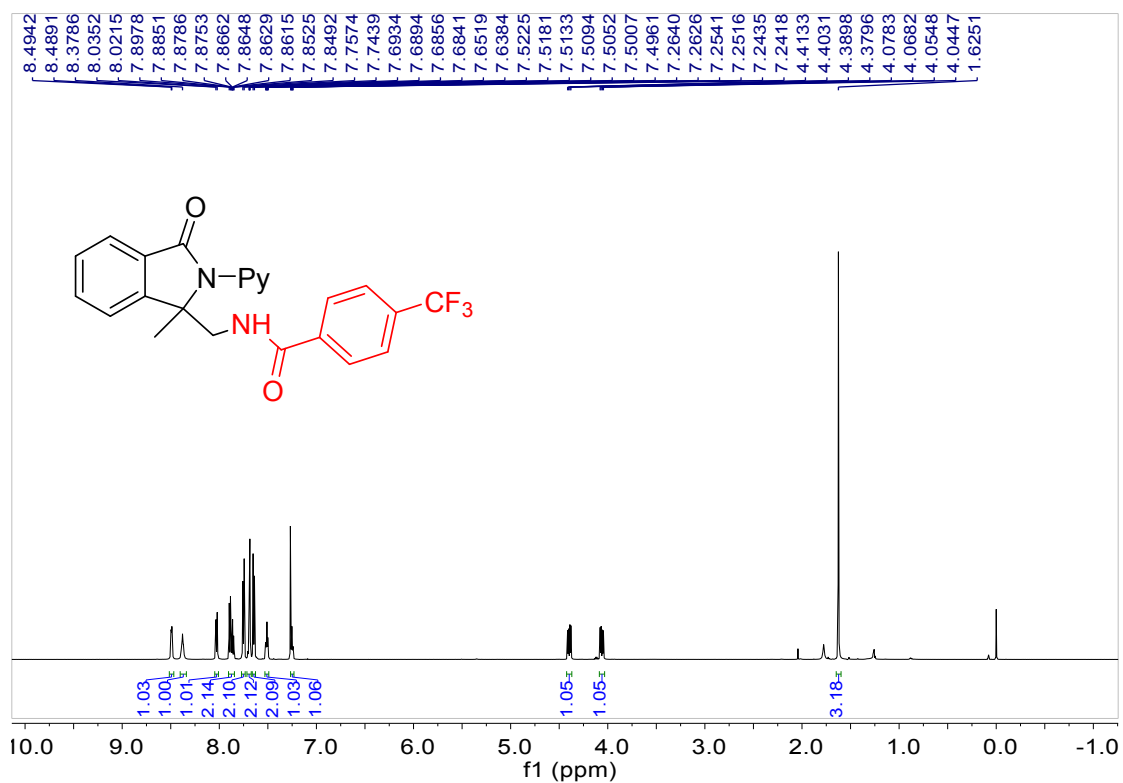

<sup>13</sup>C NMR Spectra of Compound 3ad

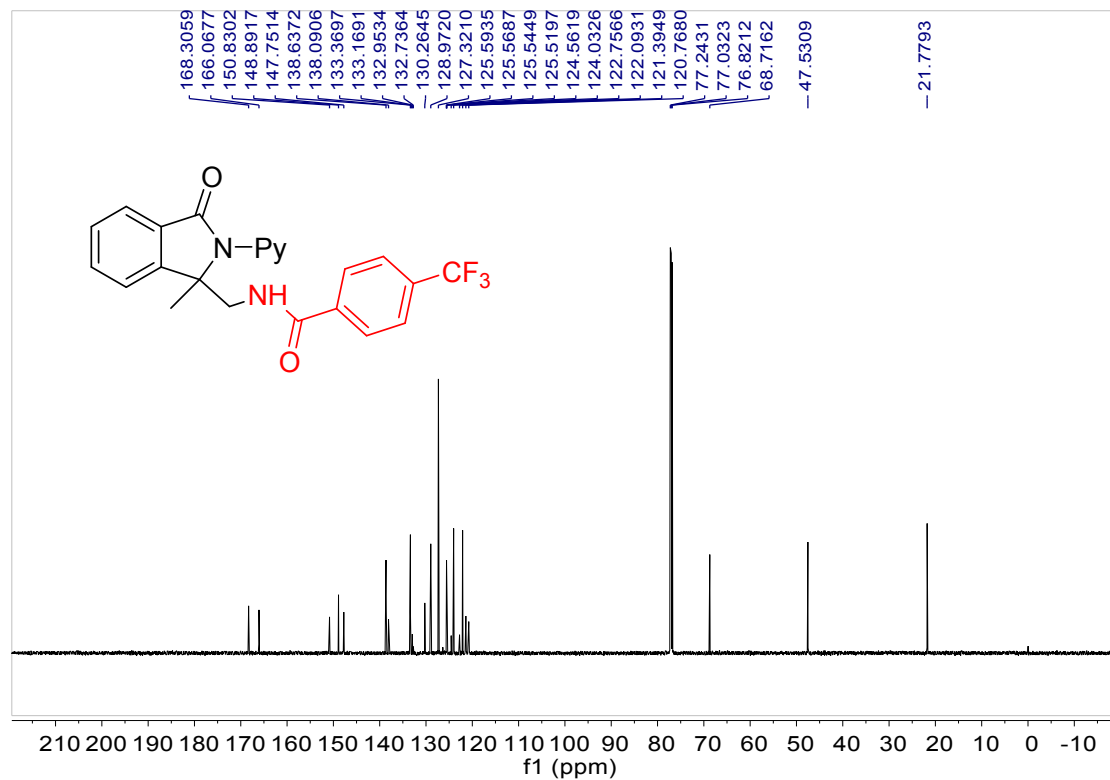

<sup>1</sup>H NMR Spectra of Compound 3ae

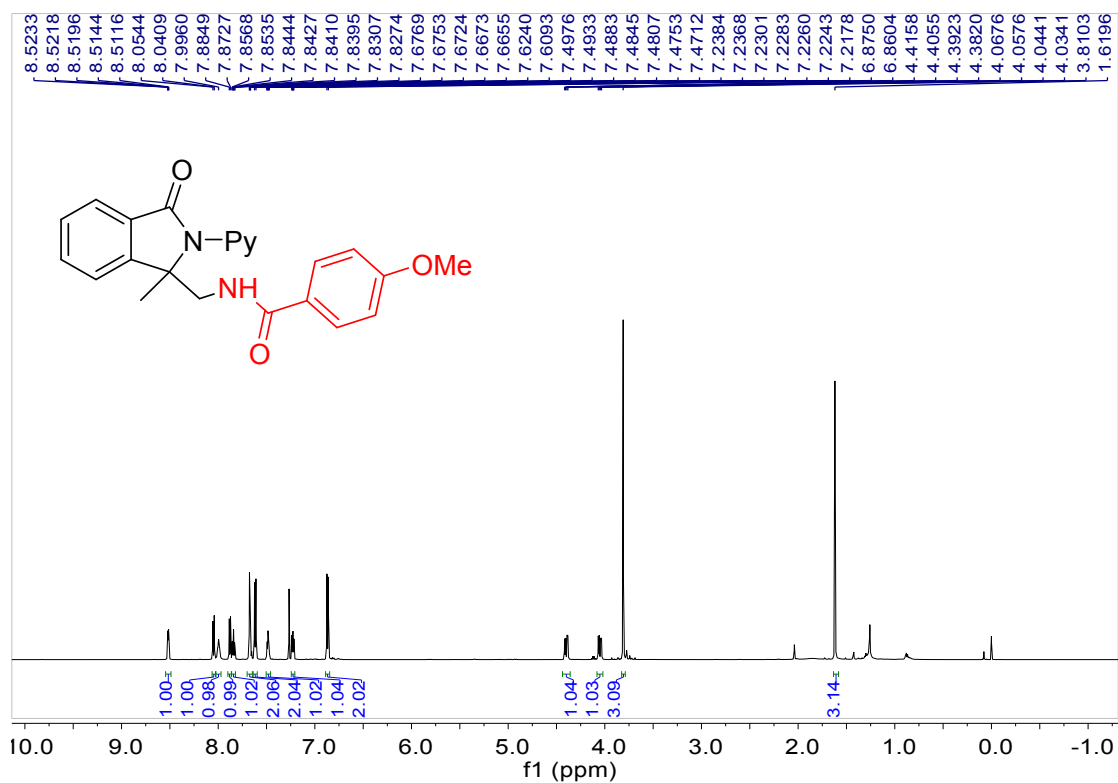

**<sup>13</sup>C NMR Spectra of Compound 3ae**

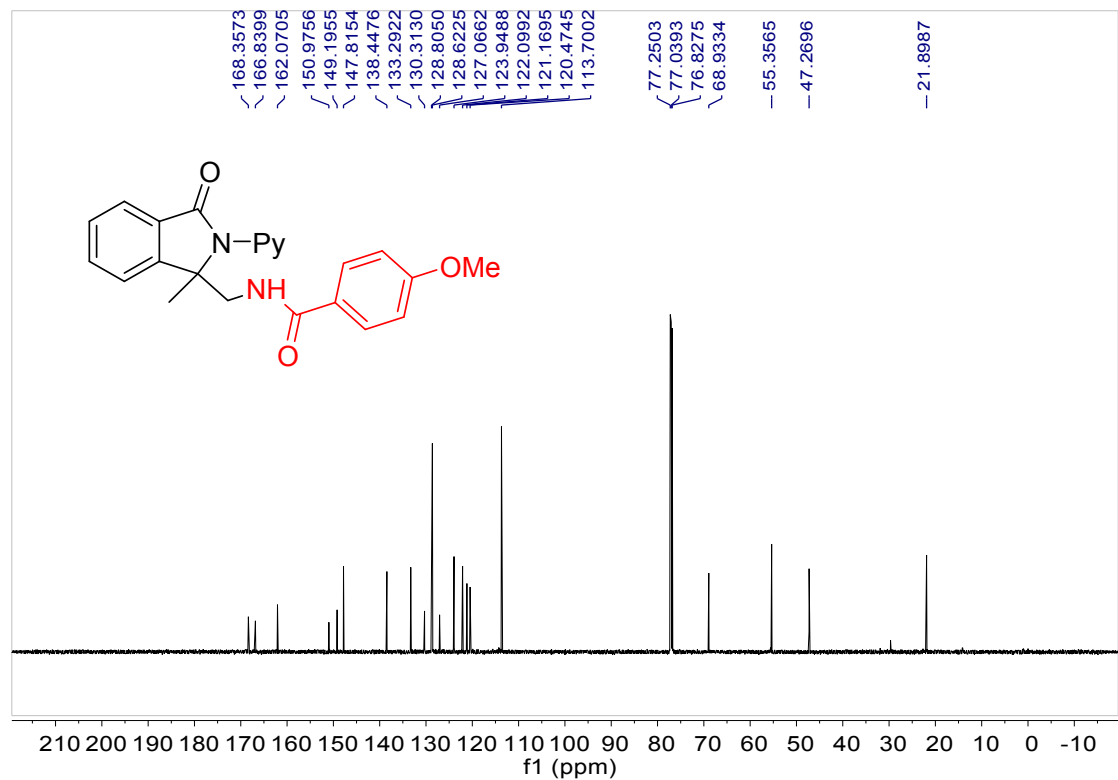

**<sup>1</sup>H NMR Spectra of Compound 3af**

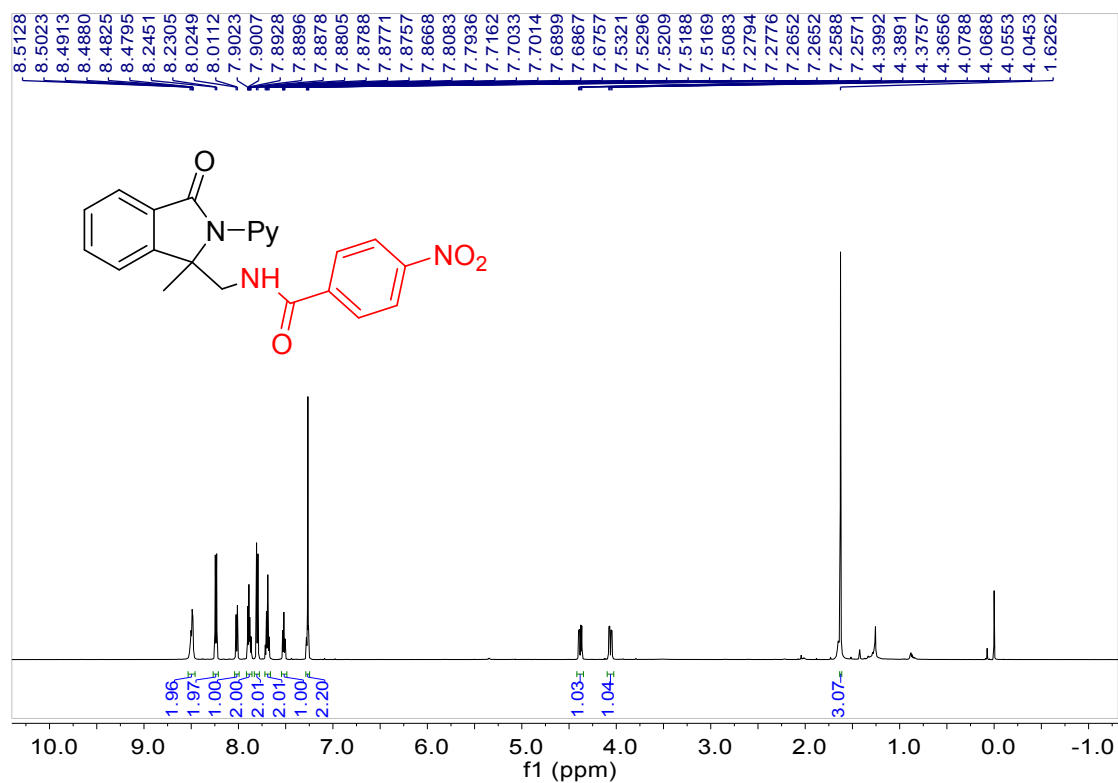

**<sup>13</sup>C NMR Spectra of Compound 3af**

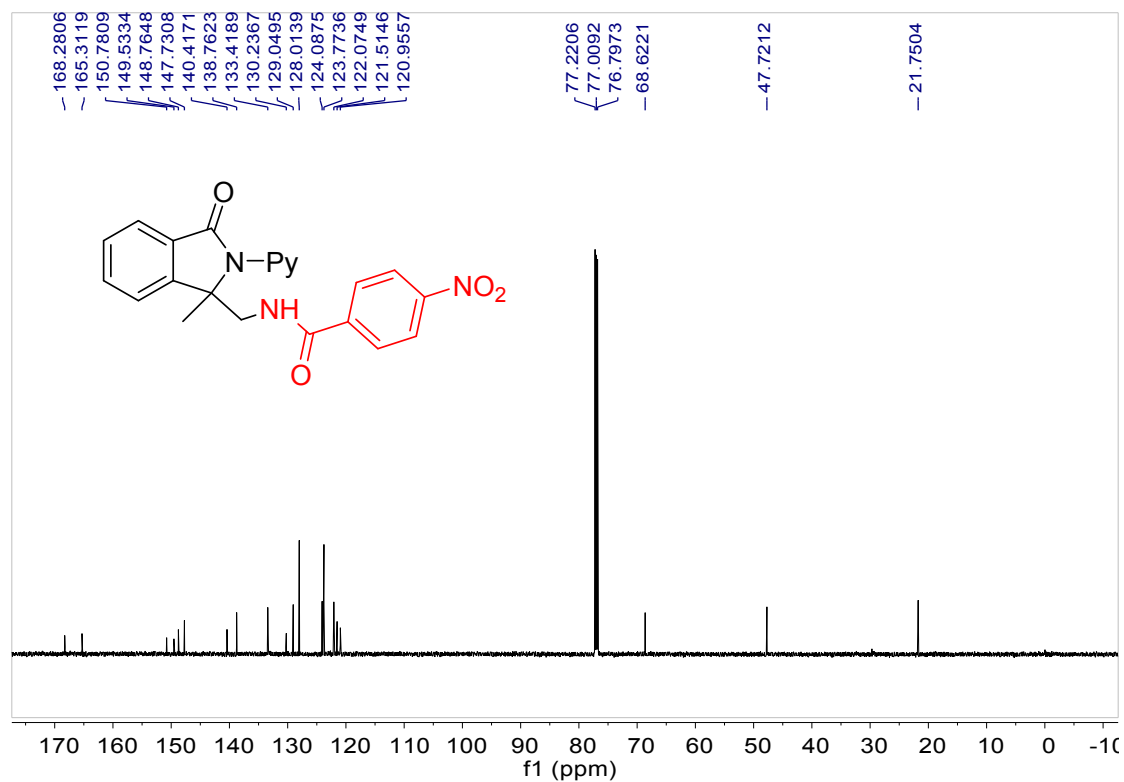

**<sup>1</sup>H NMR Spectra of Compound 3ag**



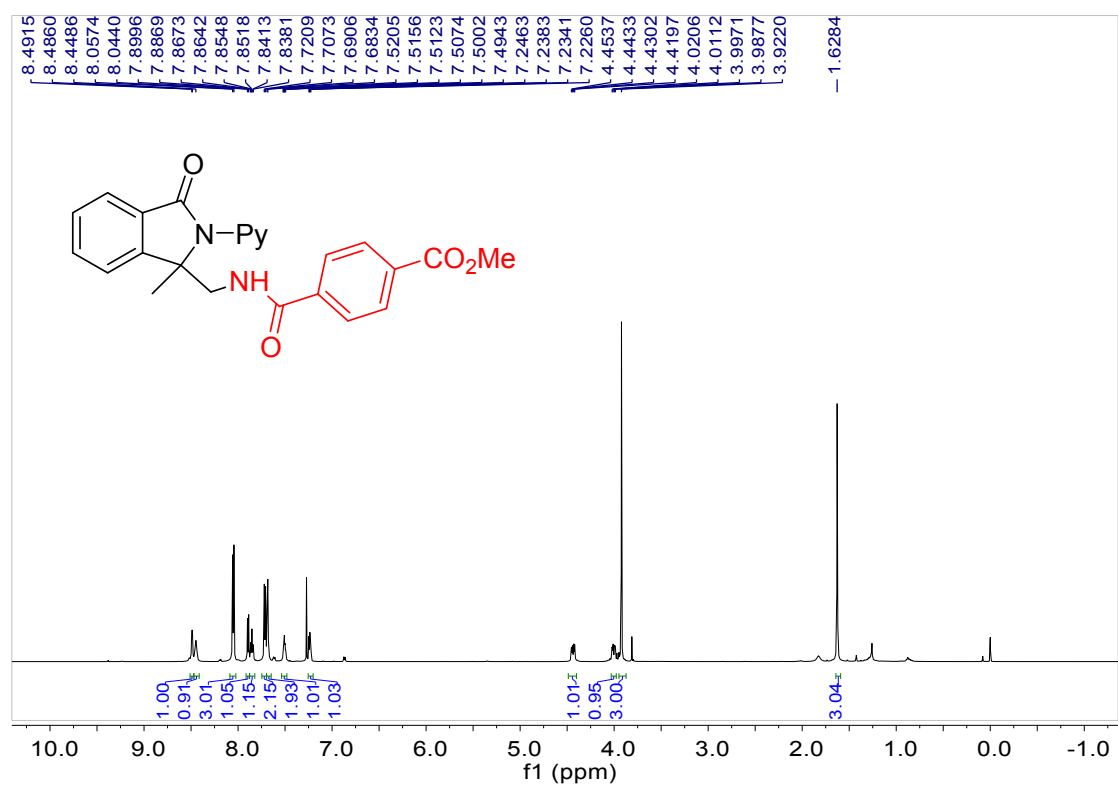

<sup>13</sup>C NMR Spectra of Compound 3ag

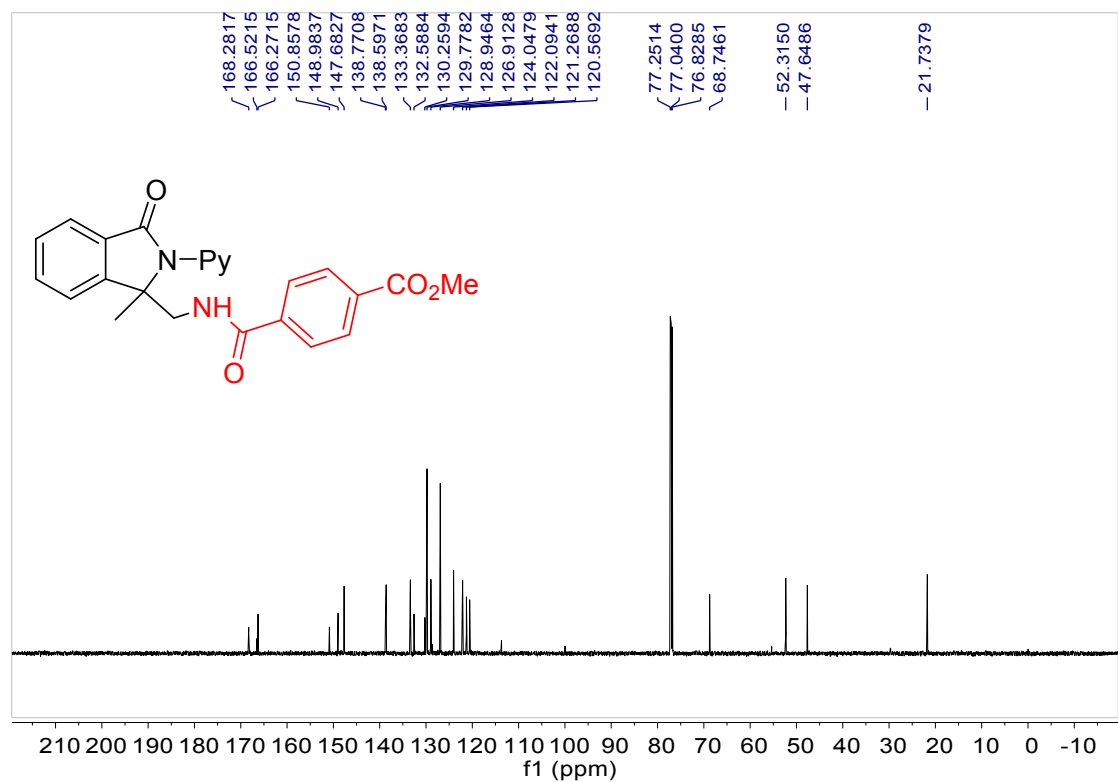

<sup>1</sup>H NMR Spectra of Compound 3ah

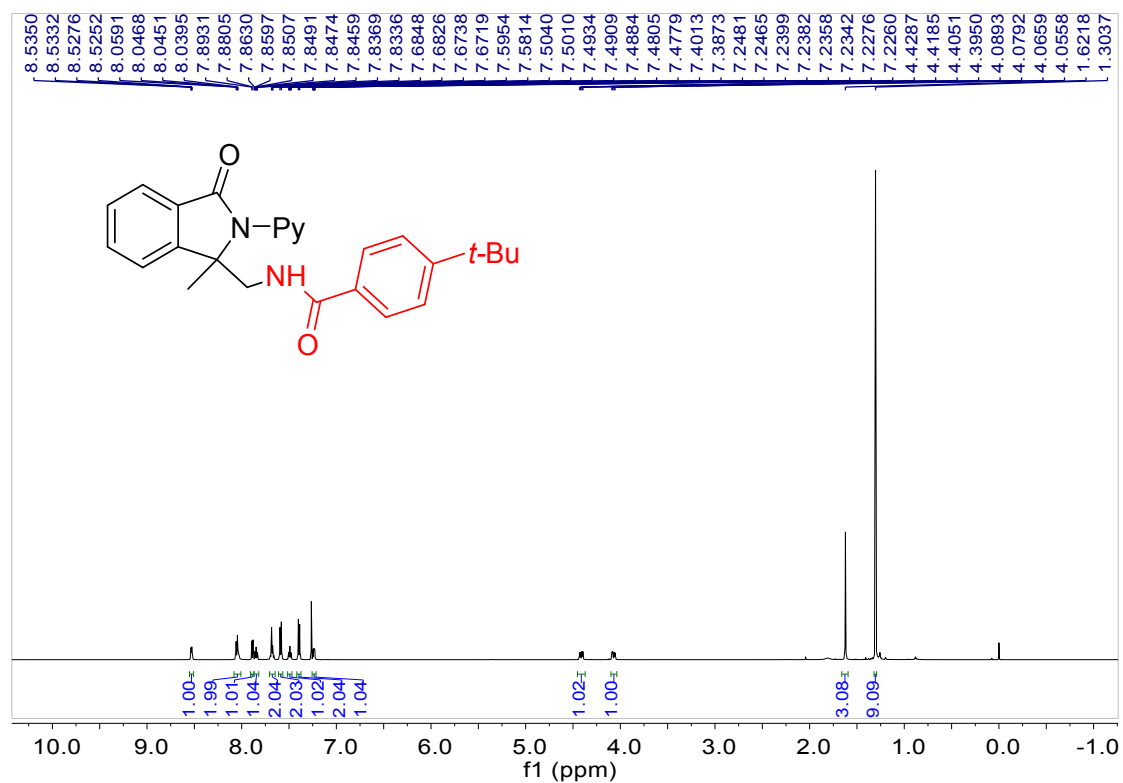

<sup>13</sup>C NMR Spectra of Compound 3ah

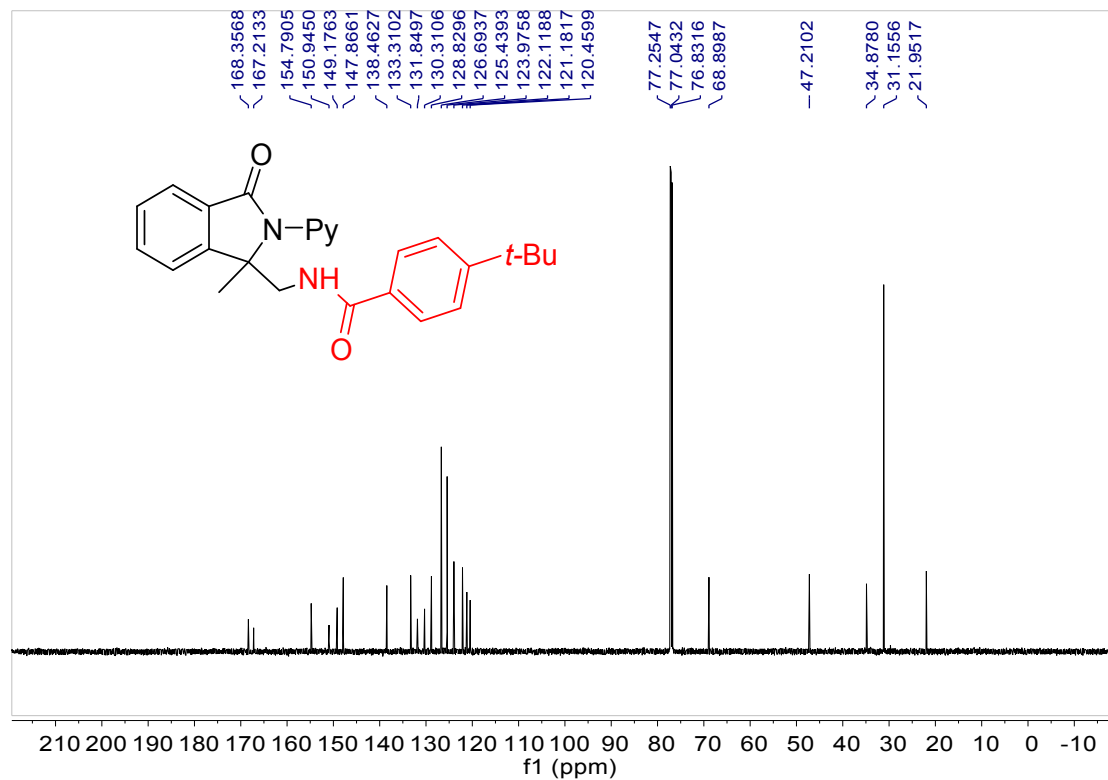

<sup>1</sup>H NMR Spectra of Compound 3ai

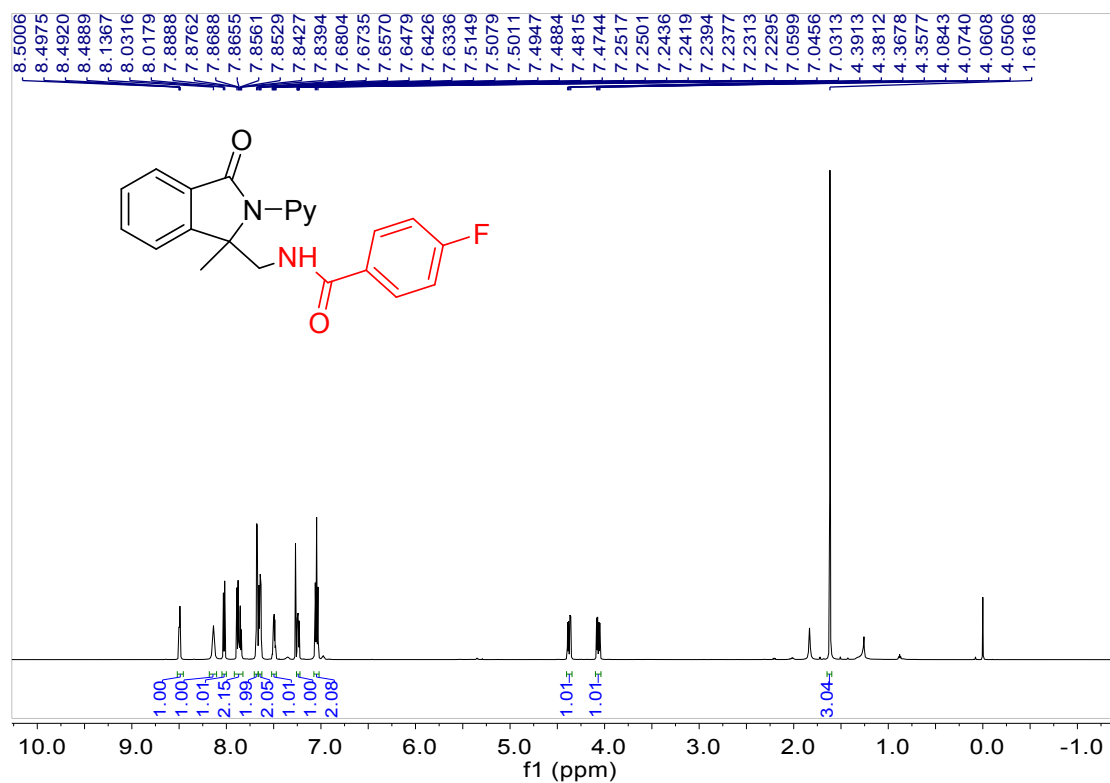

**<sup>13</sup>C NMR Spectra of Compound 3ai**

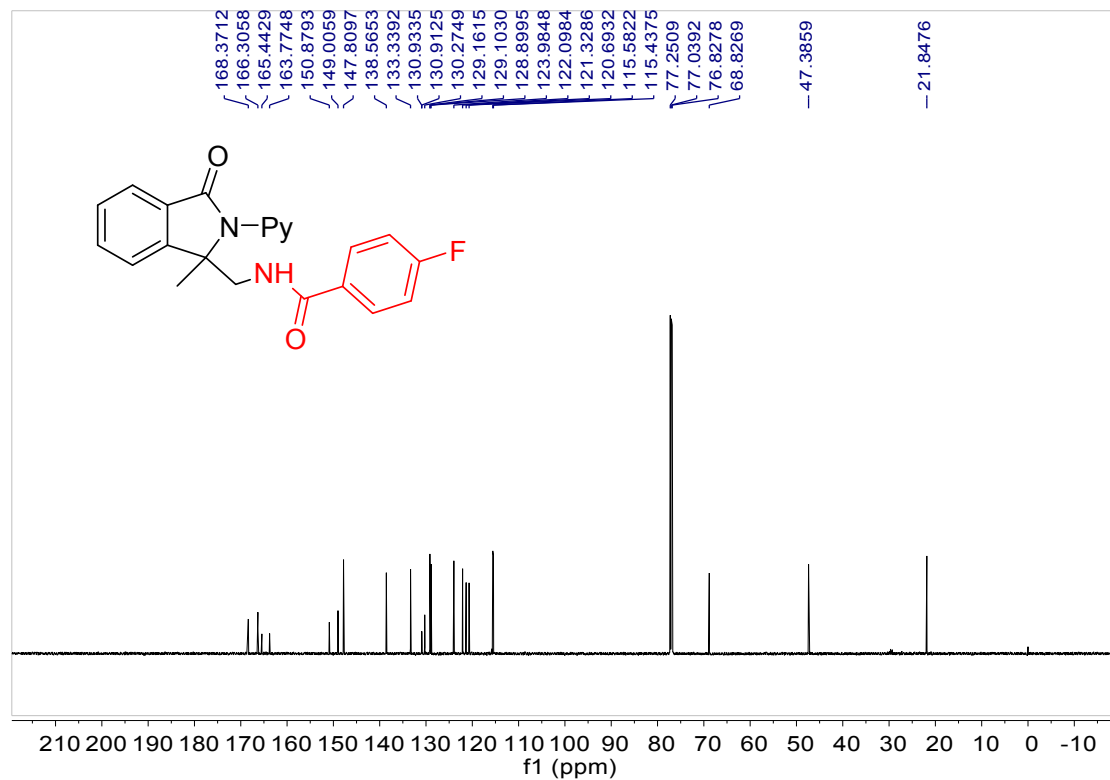

**<sup>1</sup>H NMR Spectra of Compound 3aj**

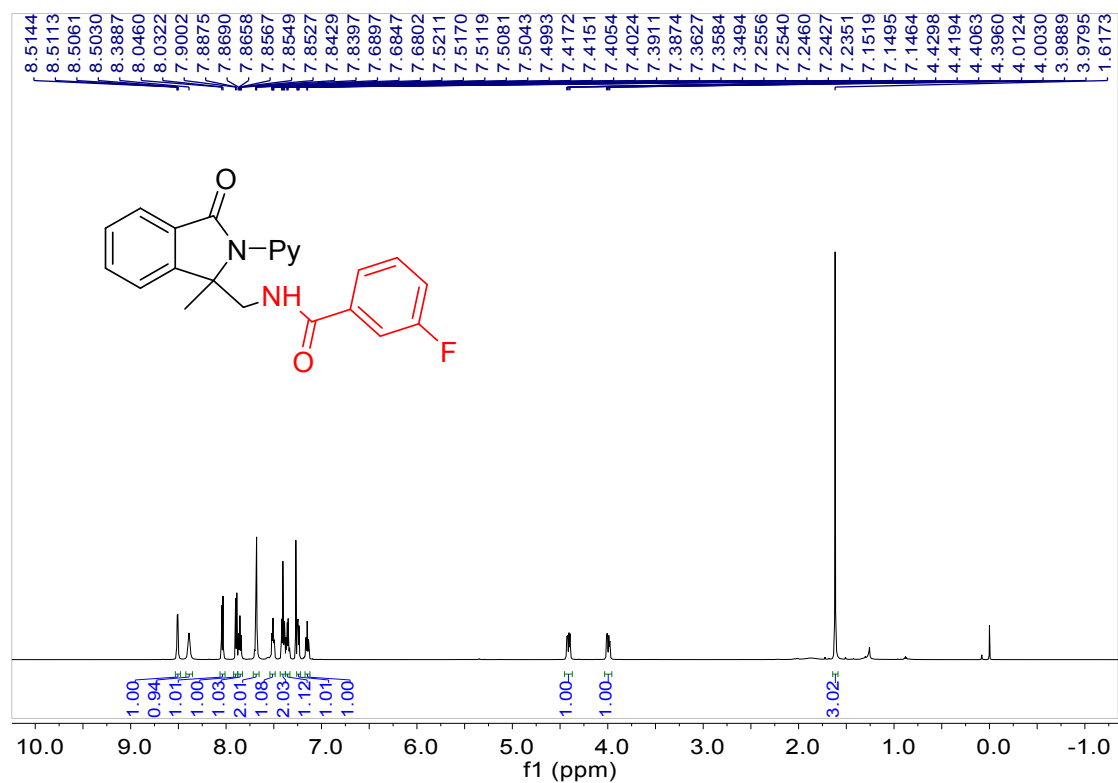

<sup>13</sup>C NMR Spectra of Compound 3aj

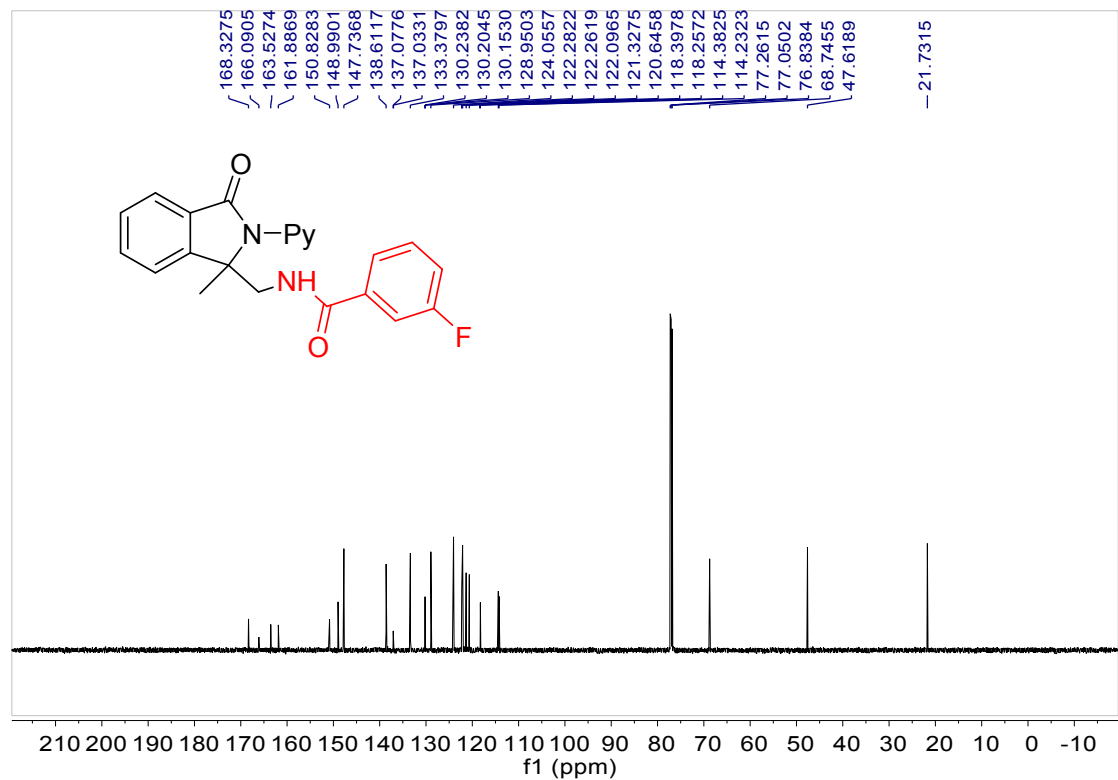

<sup>1</sup>H NMR Spectra of Compound 3ak

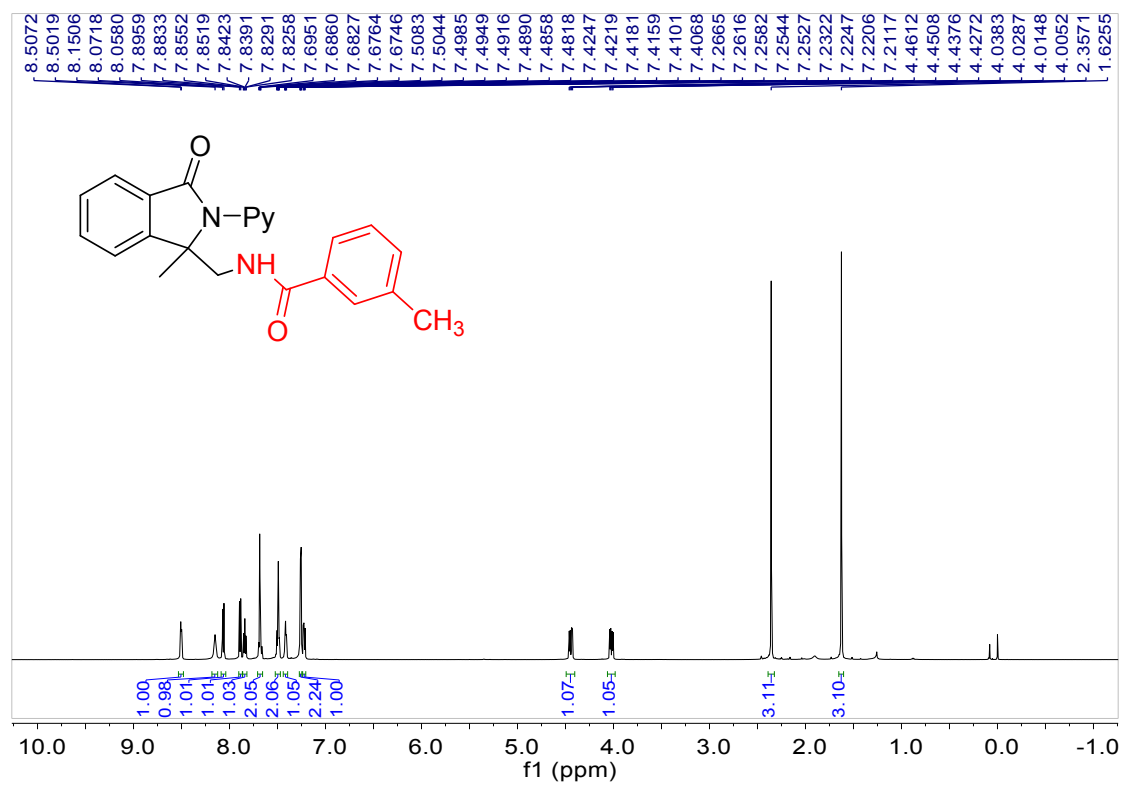

<sup>13</sup>C NMR Spectra of Compound **3ak**

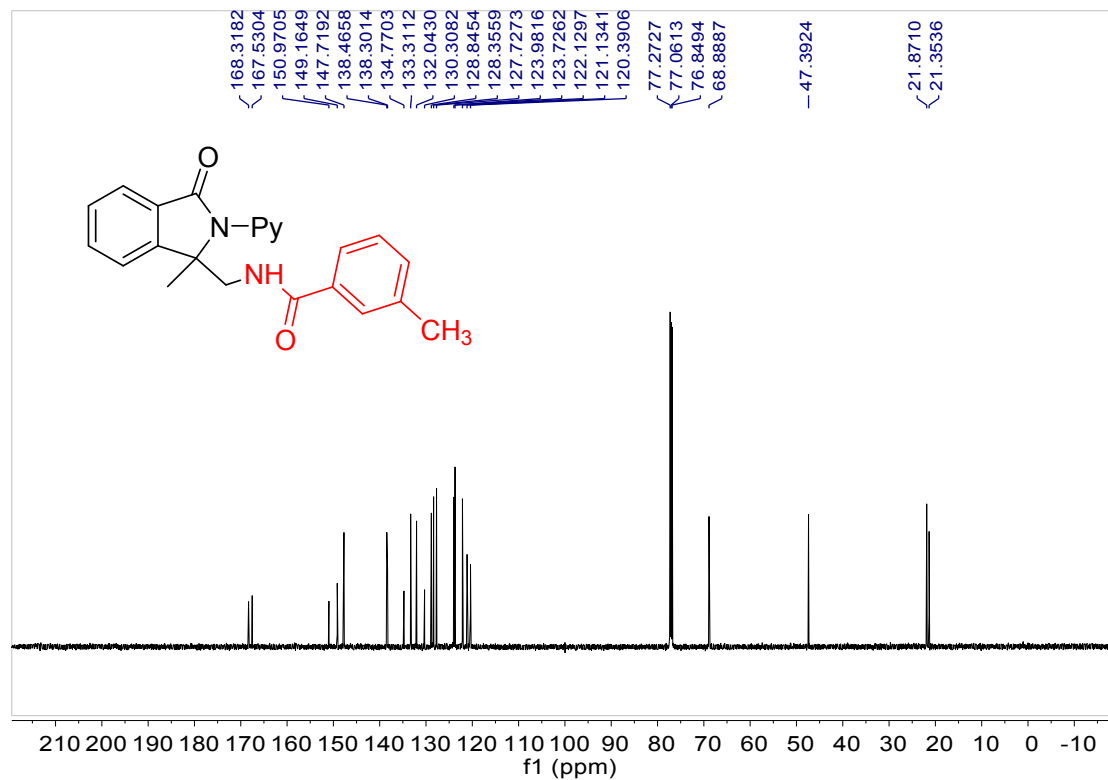

<sup>1</sup>H NMR Spectra of Compound **3al**

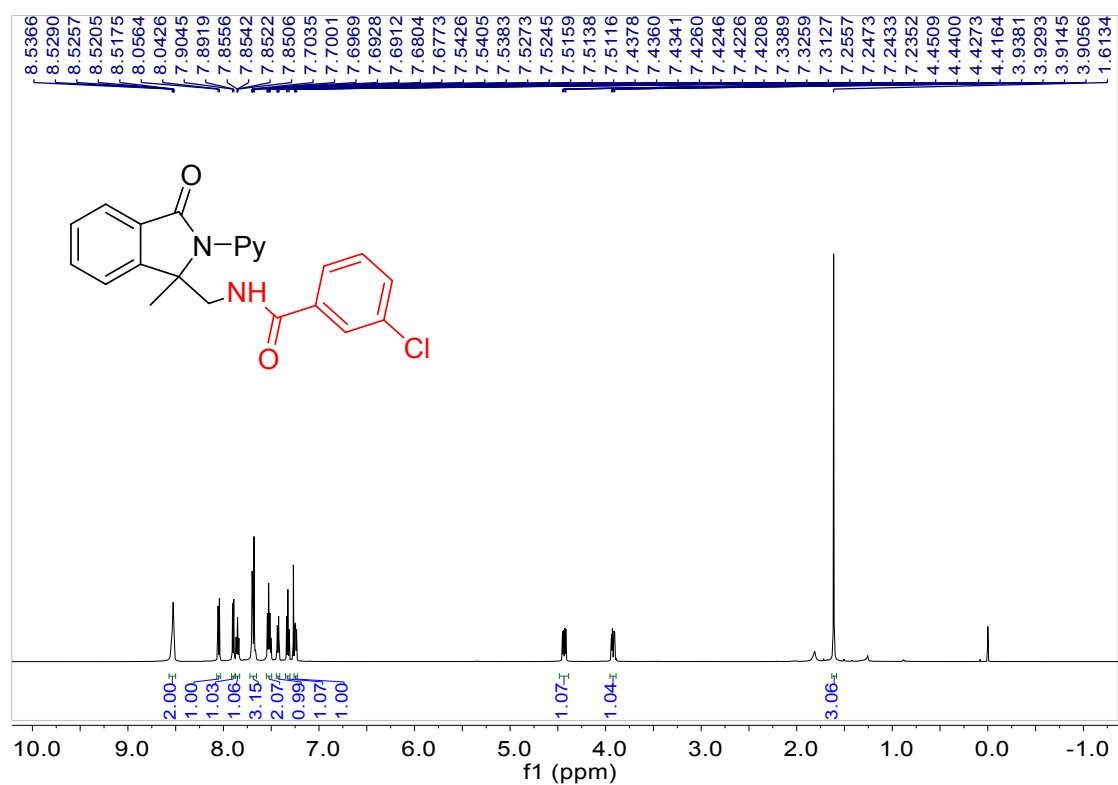

**<sup>13</sup>C NMR Spectra of Compound 3al**

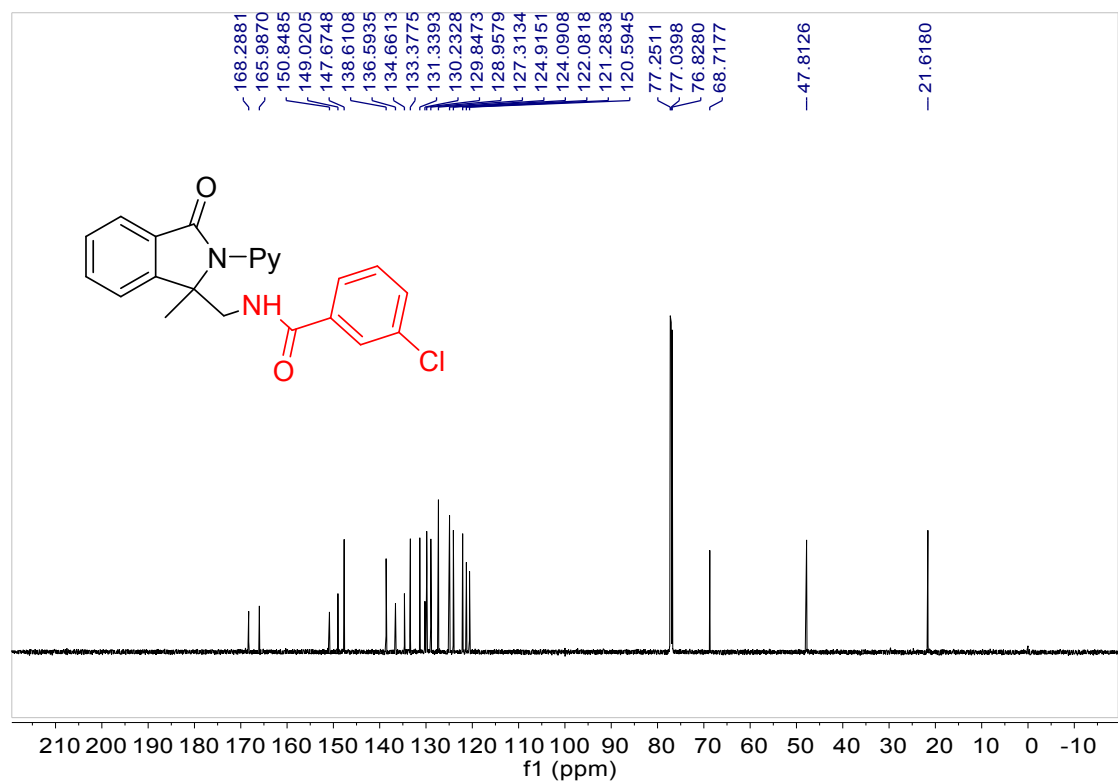

**<sup>1</sup>H NMR Spectra of Compound 3am**

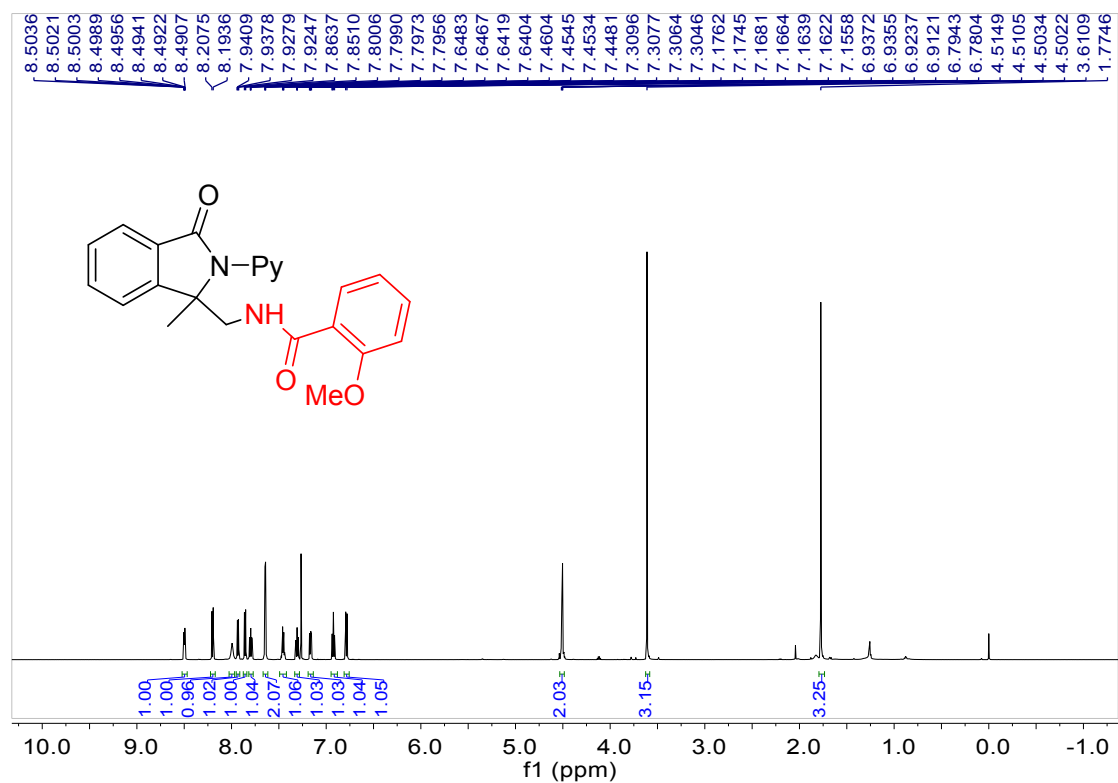

**<sup>13</sup>C NMR Spectra of Compound 3am**

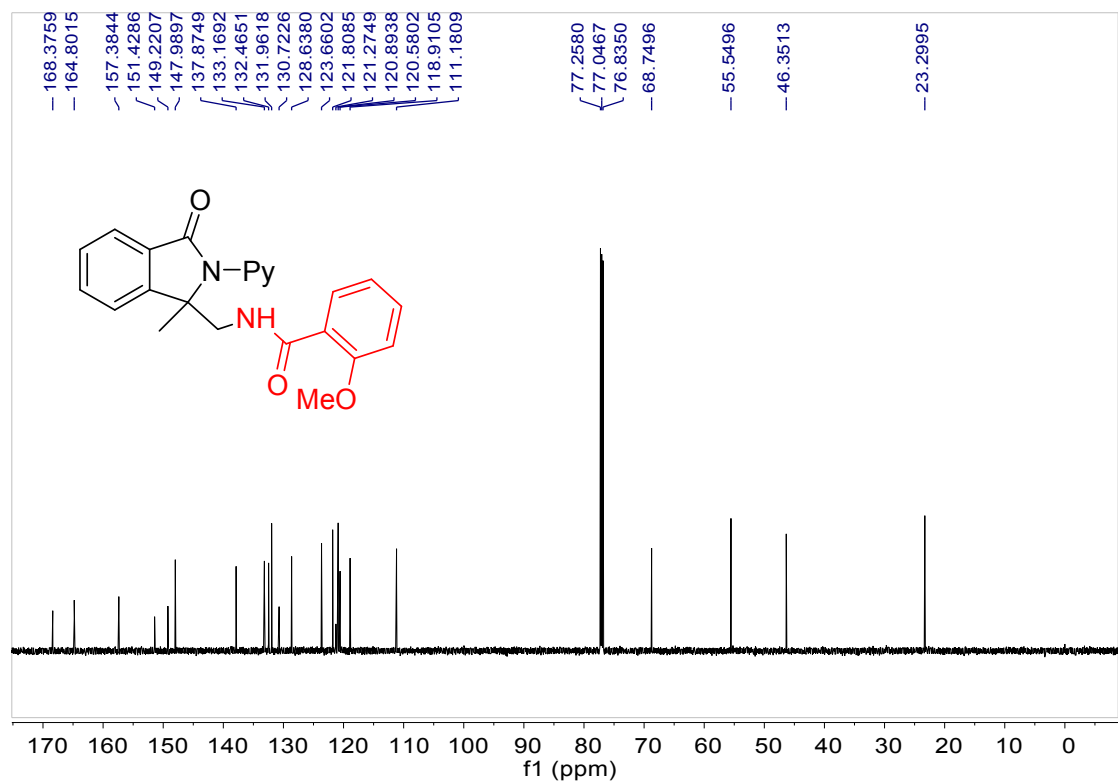

**<sup>1</sup>H NMR Spectra of Compound 3am**

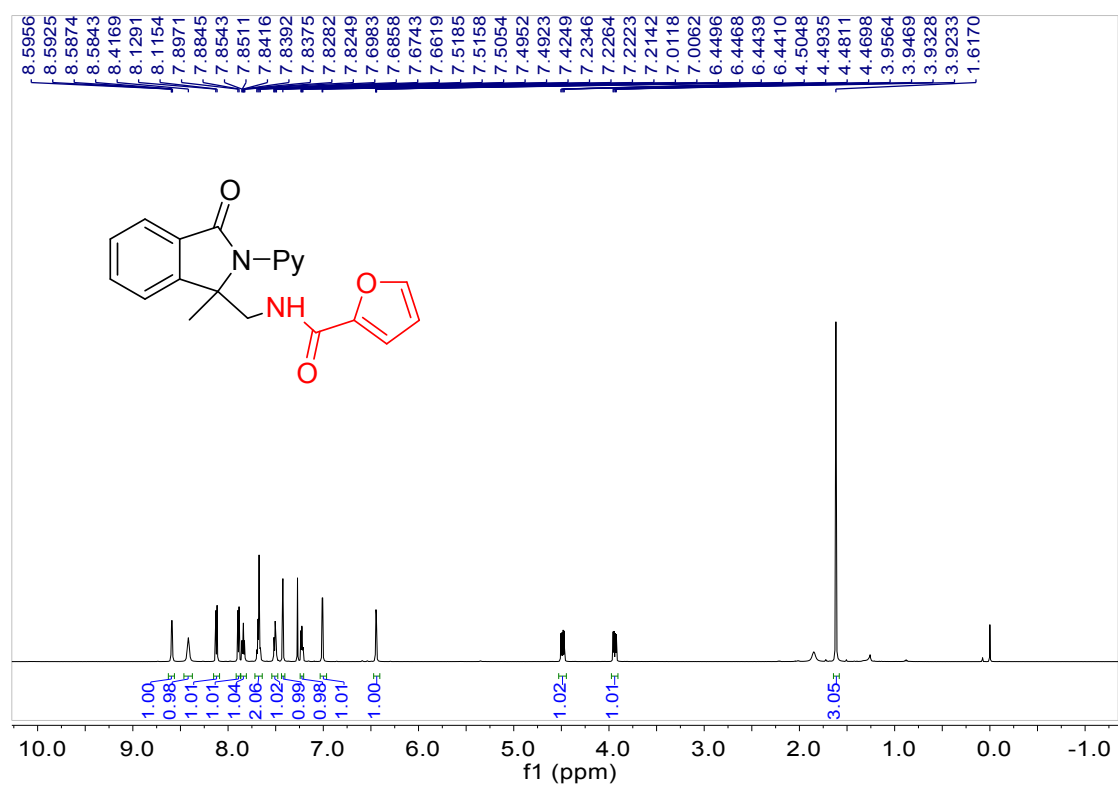

<sup>13</sup>C NMR Spectra of Compound 3an

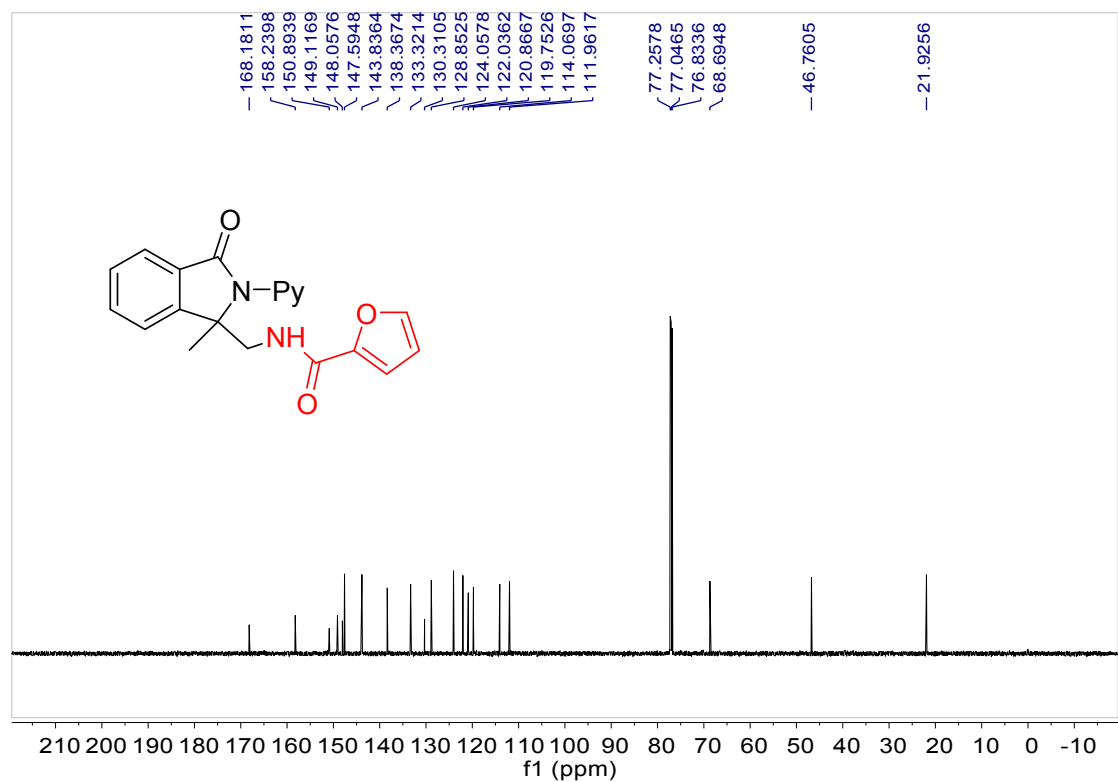

<sup>1</sup>H NMR Spectra of Compound 3ao



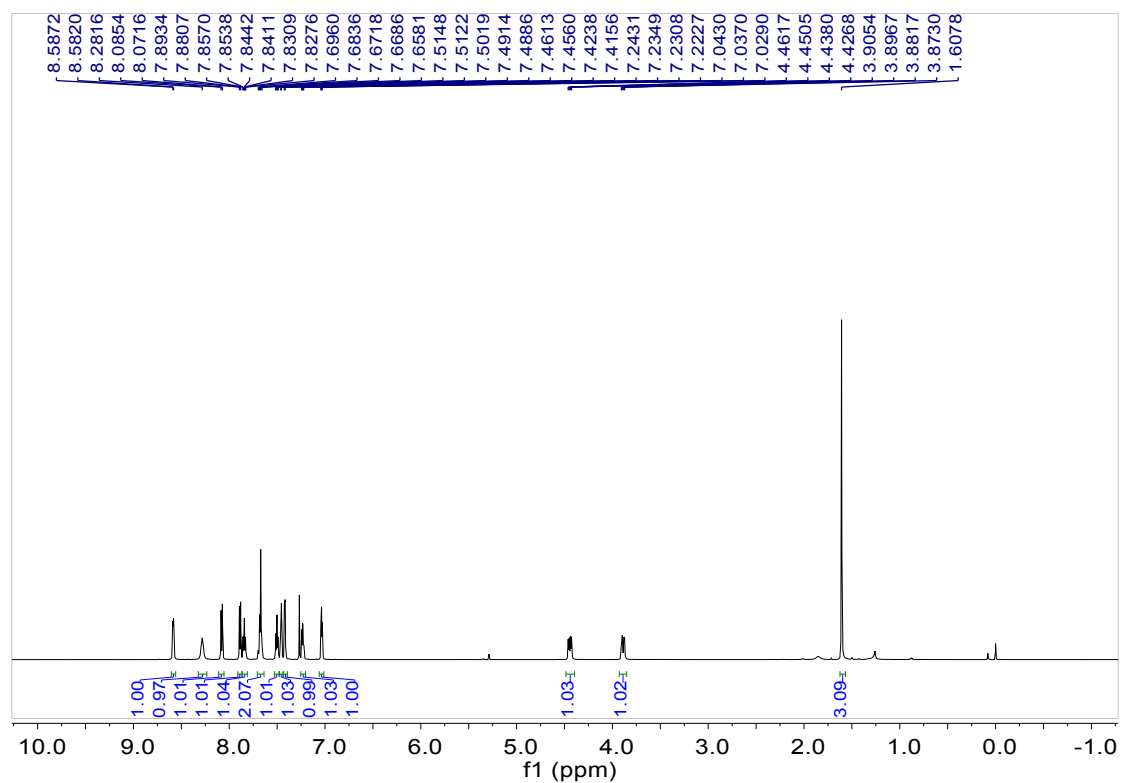

<sup>13</sup>C NMR Spectra of Compound **3ao**

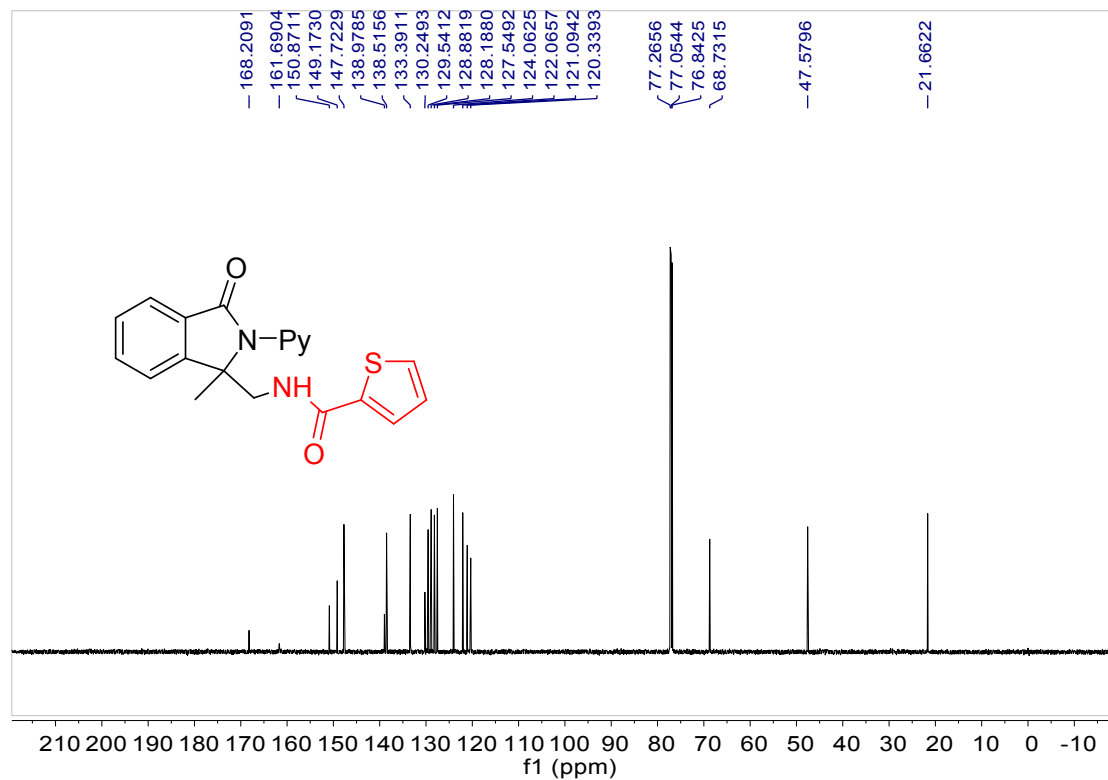

<sup>1</sup>H NMR Spectra of Compound **3ap**

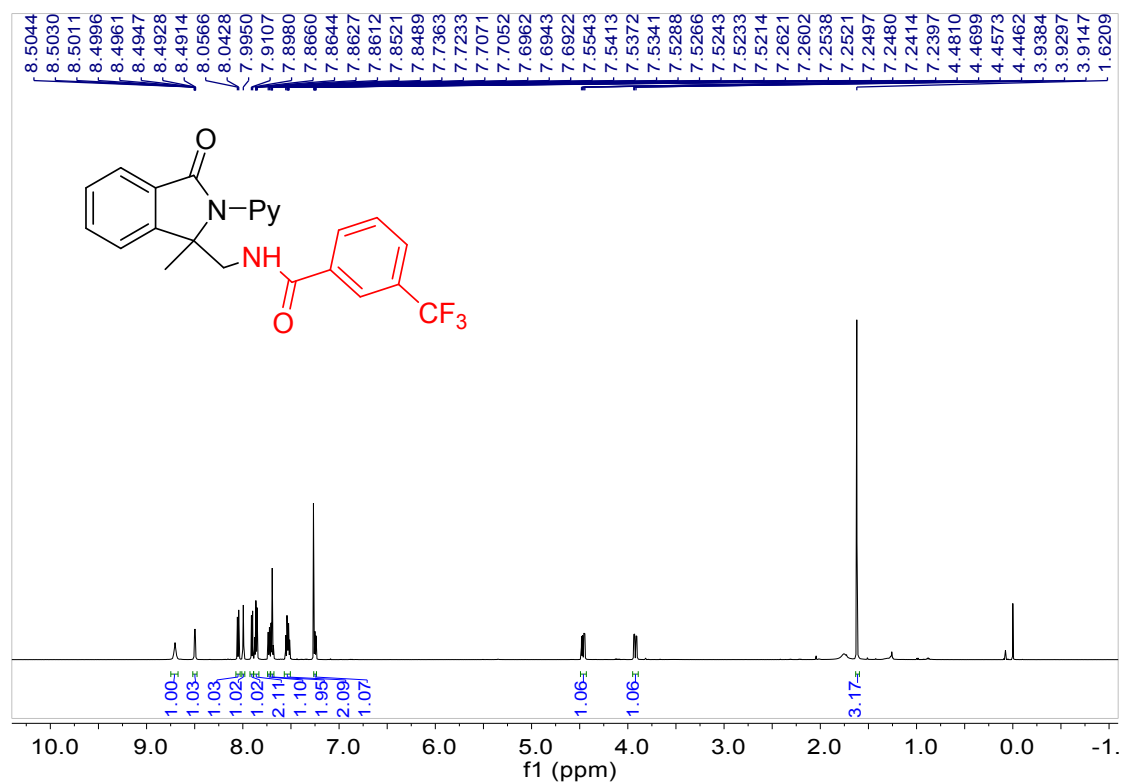

**<sup>13</sup>C NMR Spectra of Compound 3ap**

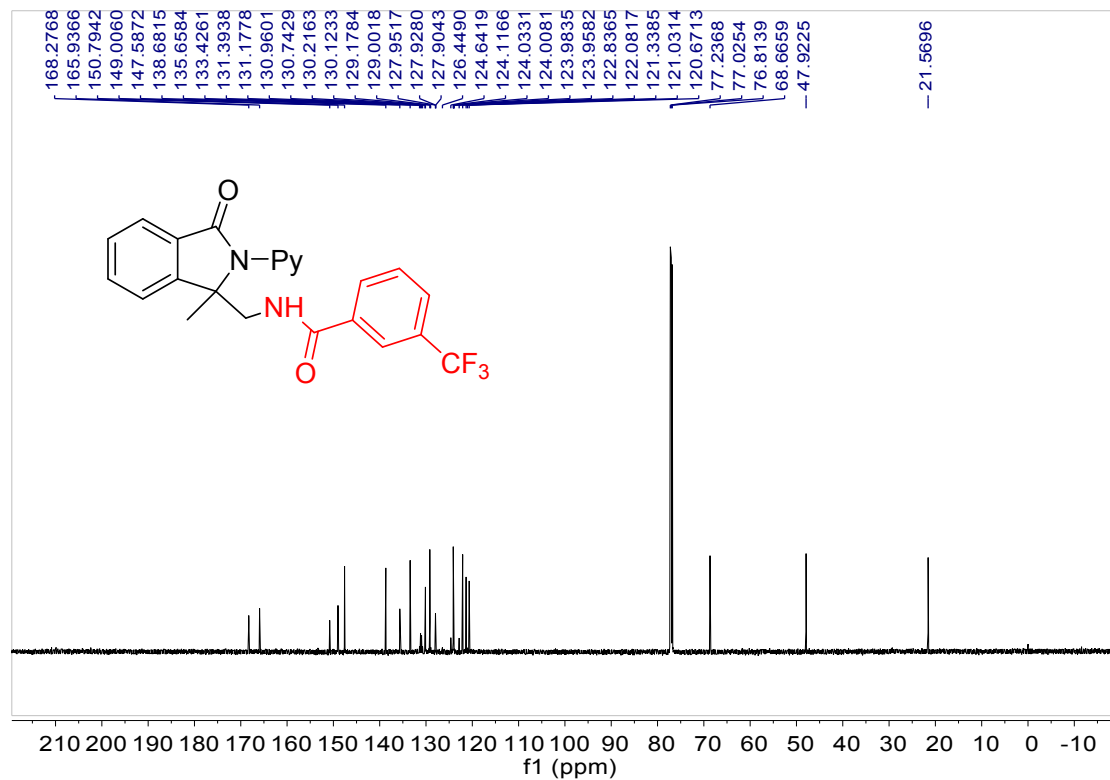

**<sup>1</sup>H NMR Spectra of Compound 3aq**

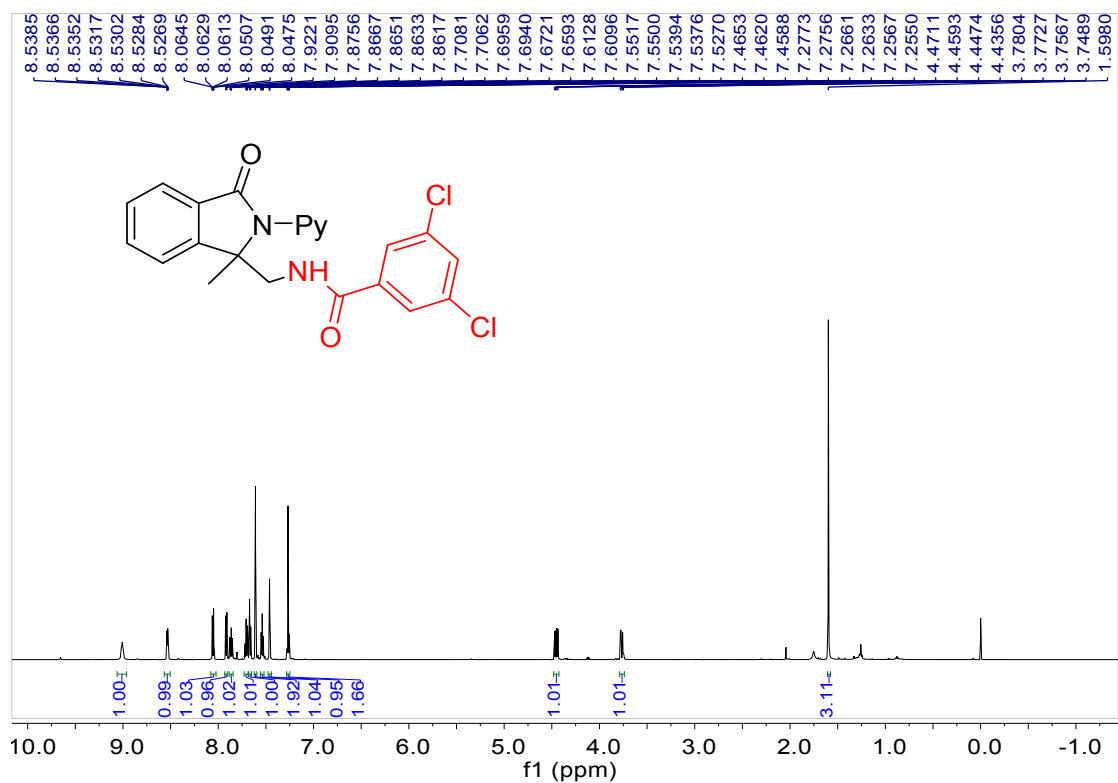

<sup>13</sup>C NMR Spectra of Compound 3aq

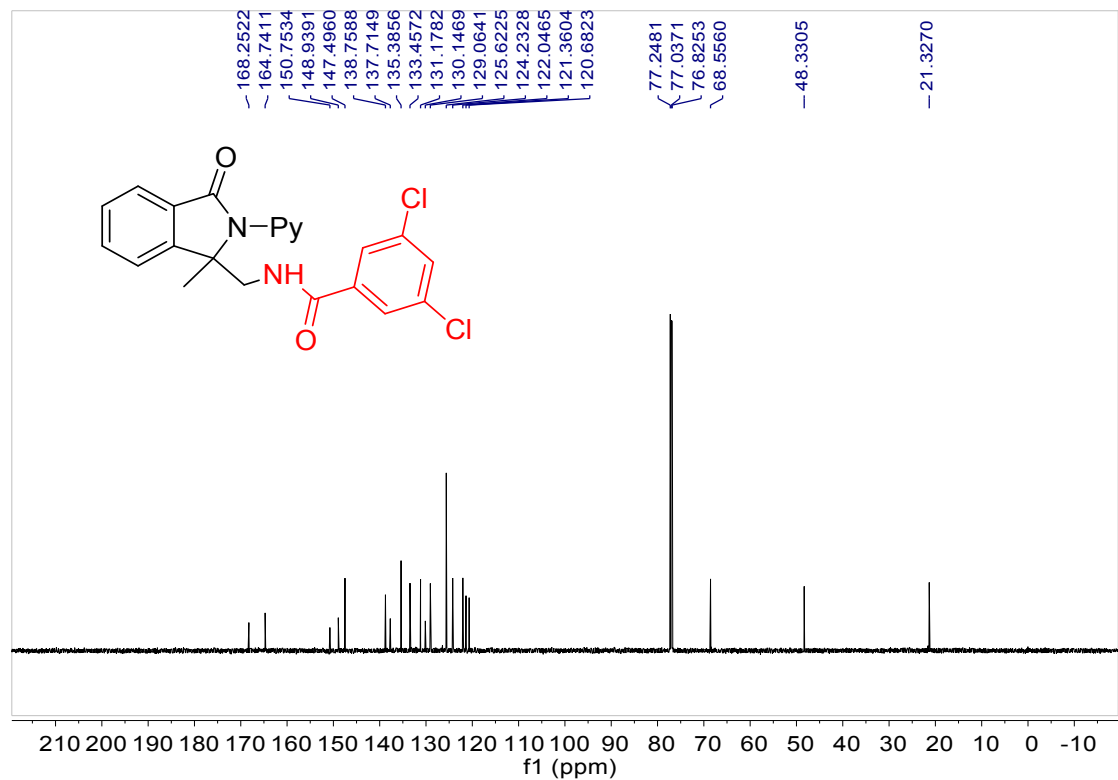

<sup>1</sup>H NMR Spectra of Compound 3ar

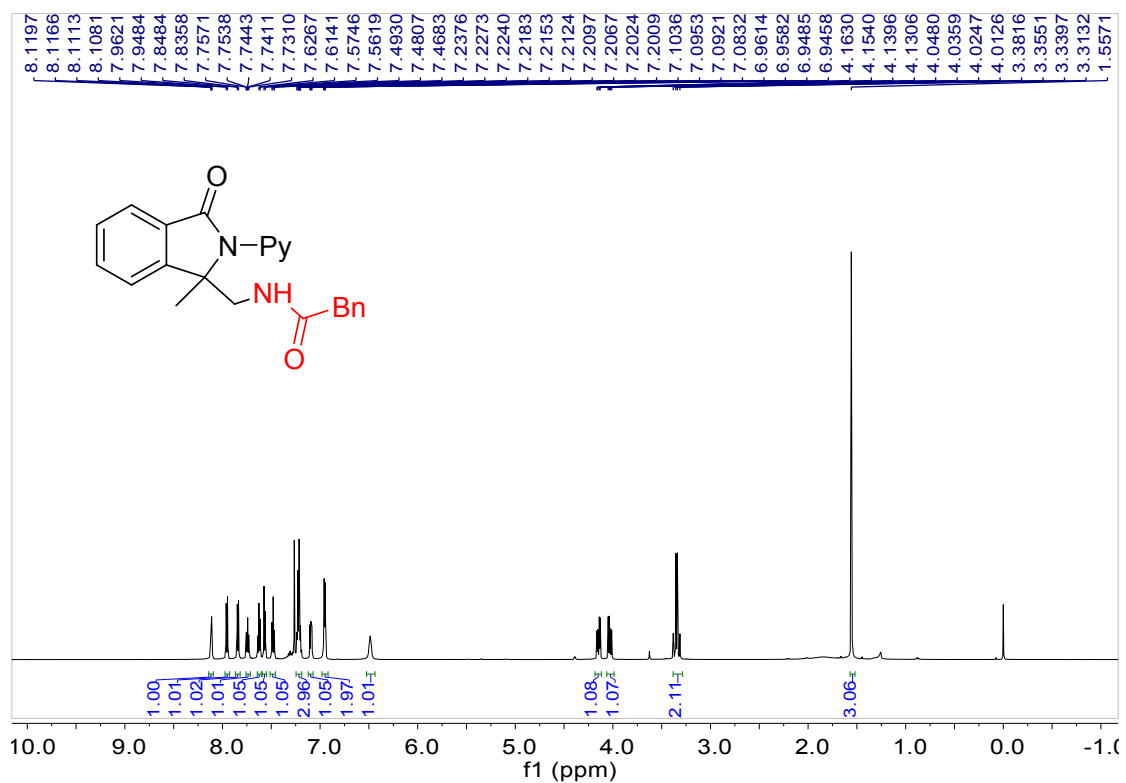

**<sup>13</sup>C NMR Spectra of Compound 3ar**

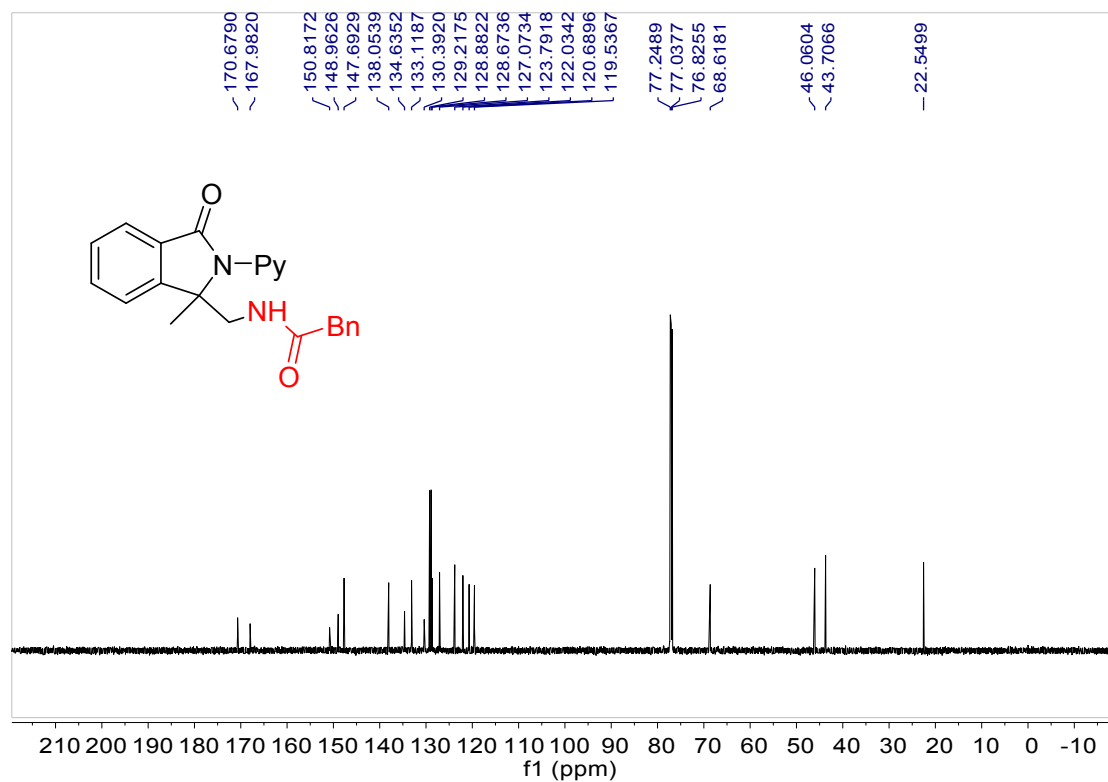

**<sup>1</sup>H NMR Spectra of Compound 3as**

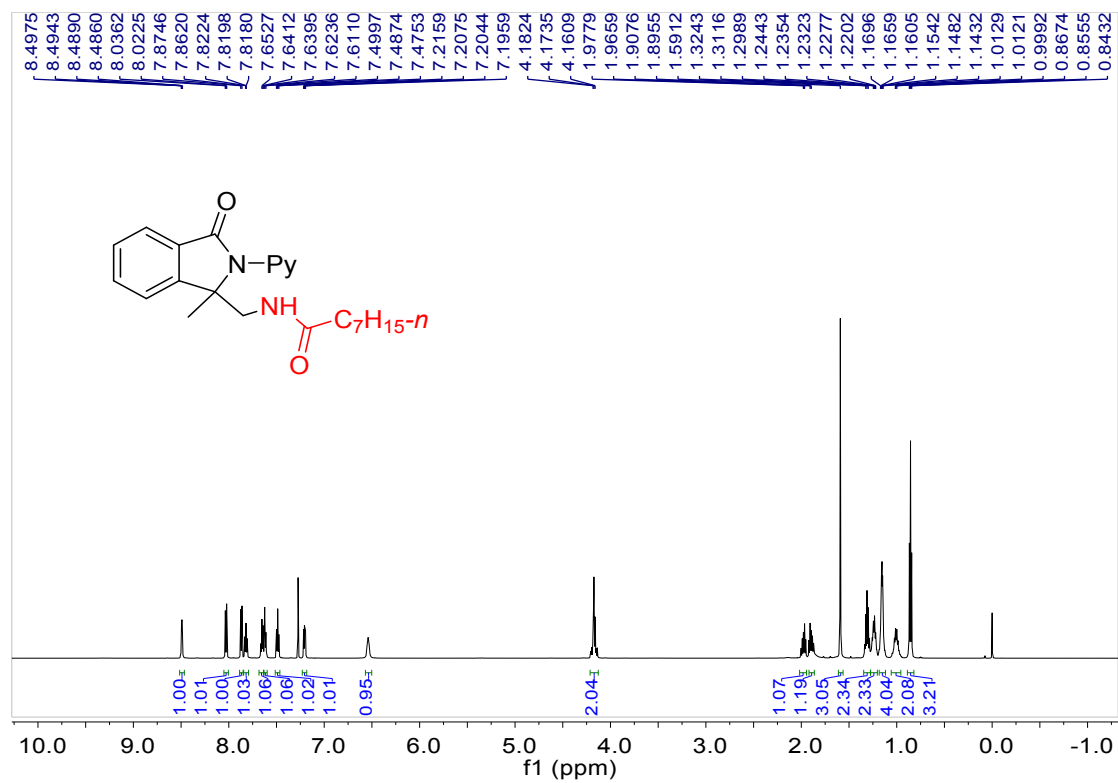

<sup>13</sup>C NMR Spectra of Compound 3as

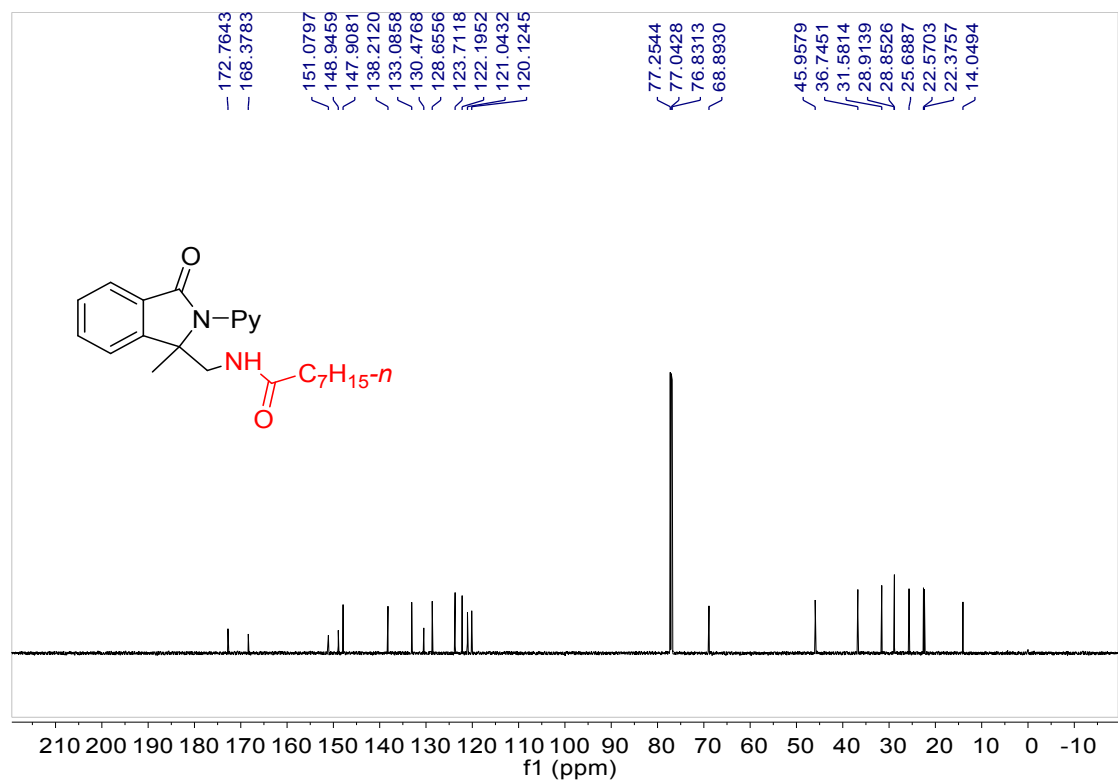

<sup>1</sup>H NMR Spectra of Compound 4ba

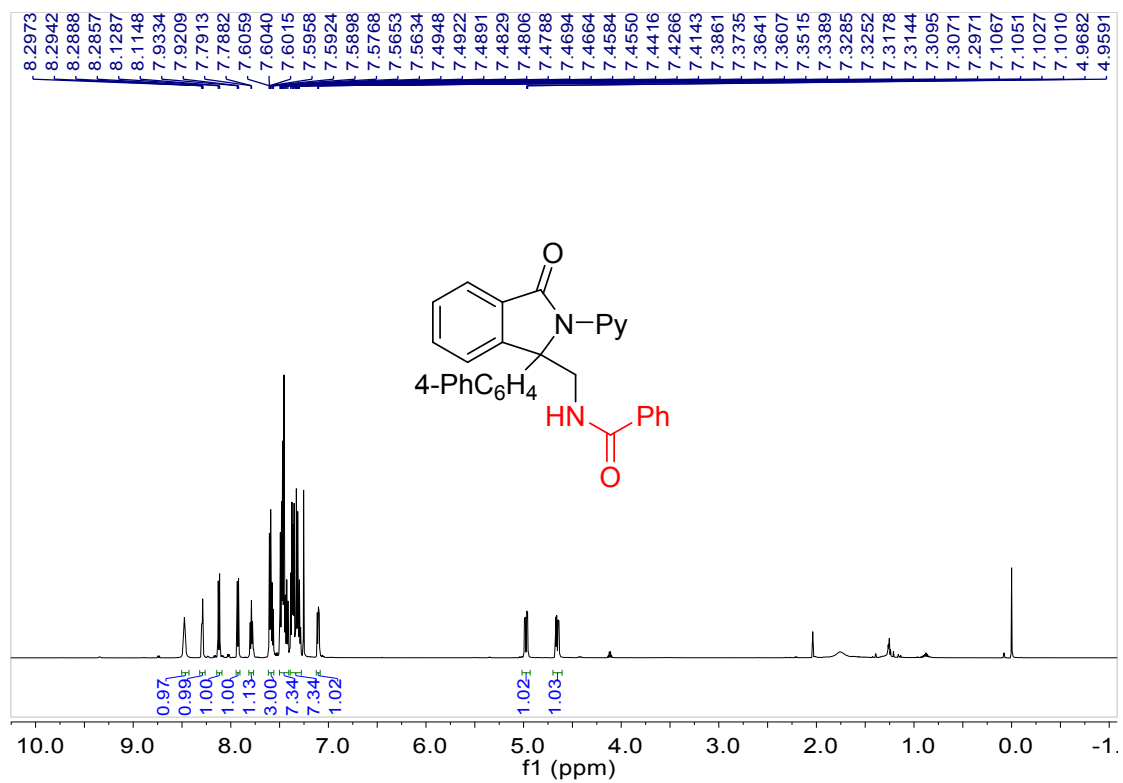

**<sup>13</sup>C NMR Spectra of Compound 4ba**

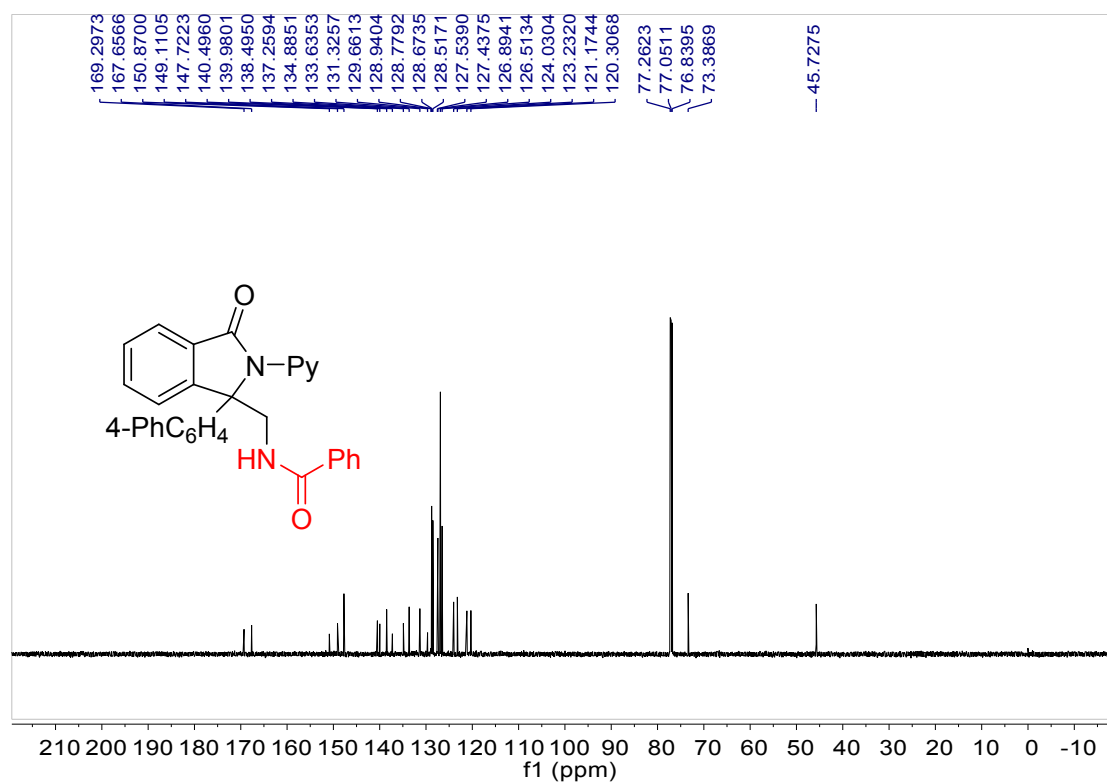

**<sup>1</sup>H NMR Spectra of Compound 4ca**

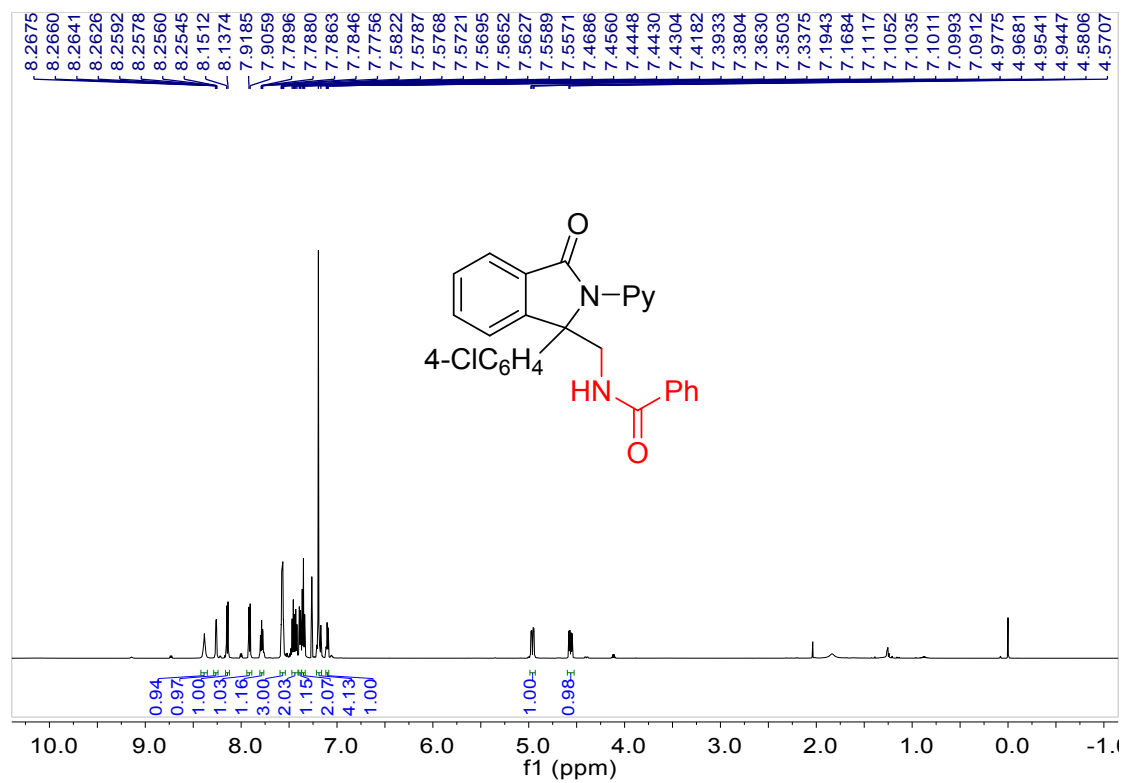

<sup>13</sup>C NMR Spectra of Compound 4ca

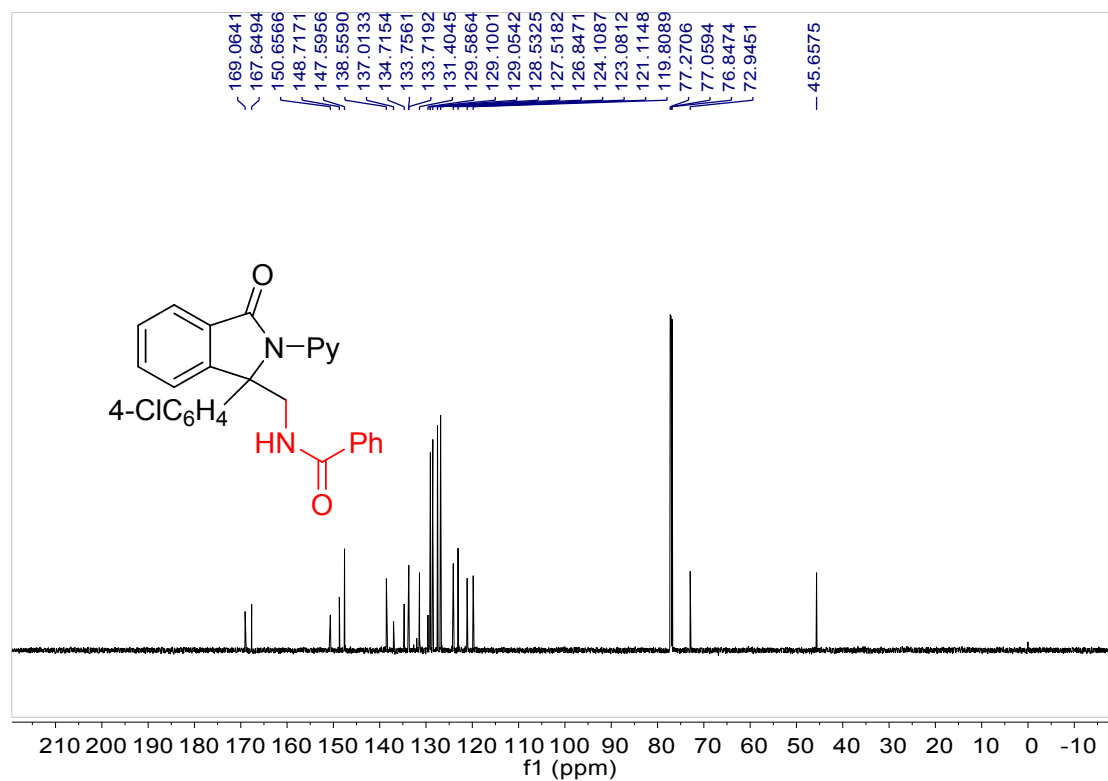

<sup>1</sup>H NMR Spectra of Compound 4da

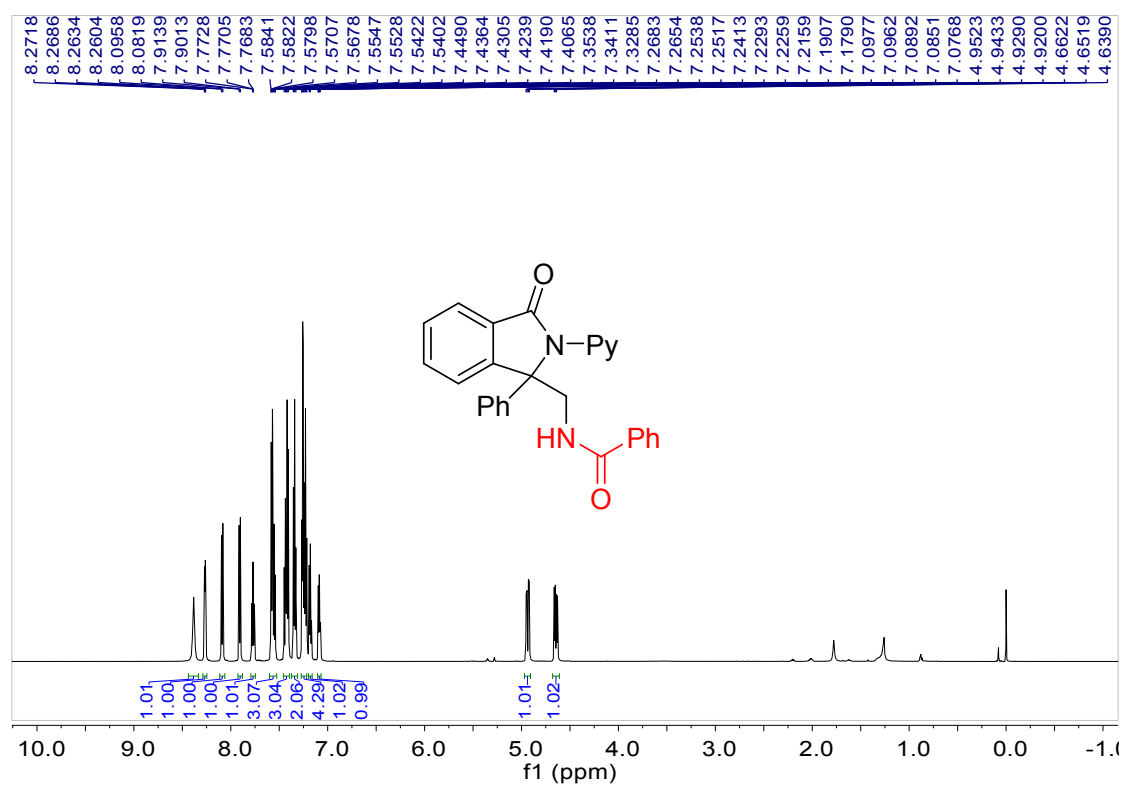

<sup>13</sup>C NMR Spectra of Compound 4da

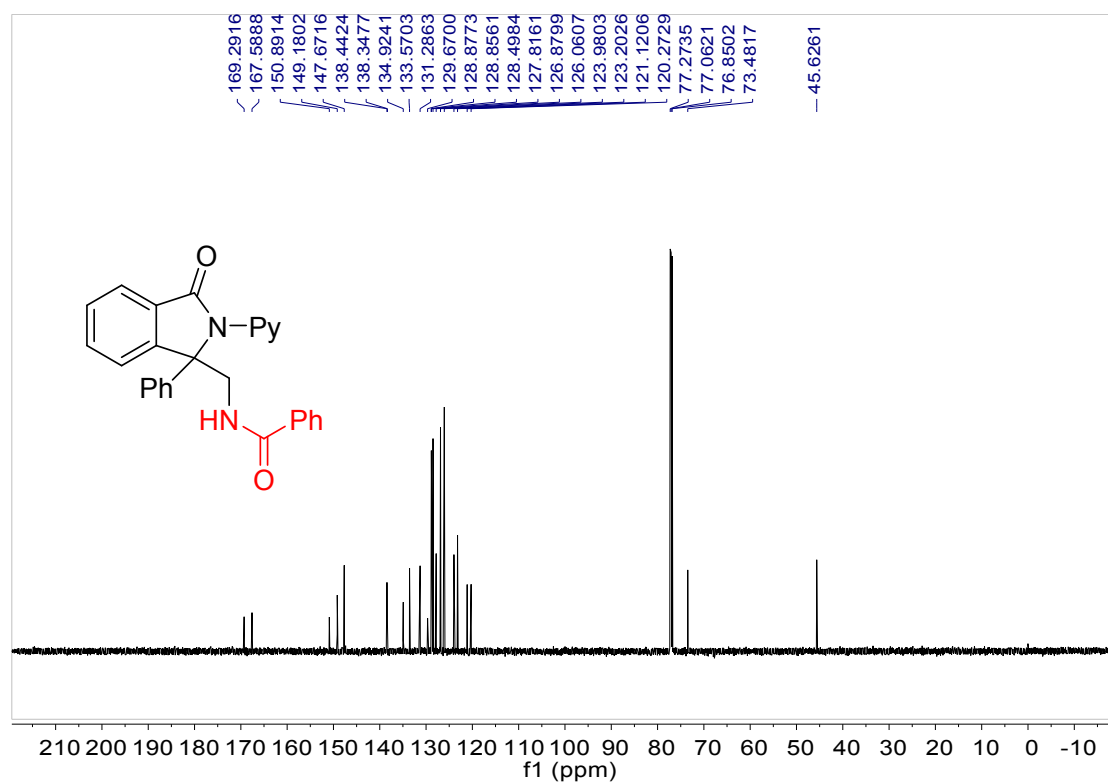

<sup>1</sup>H NMR Spectra of Compound 4ea



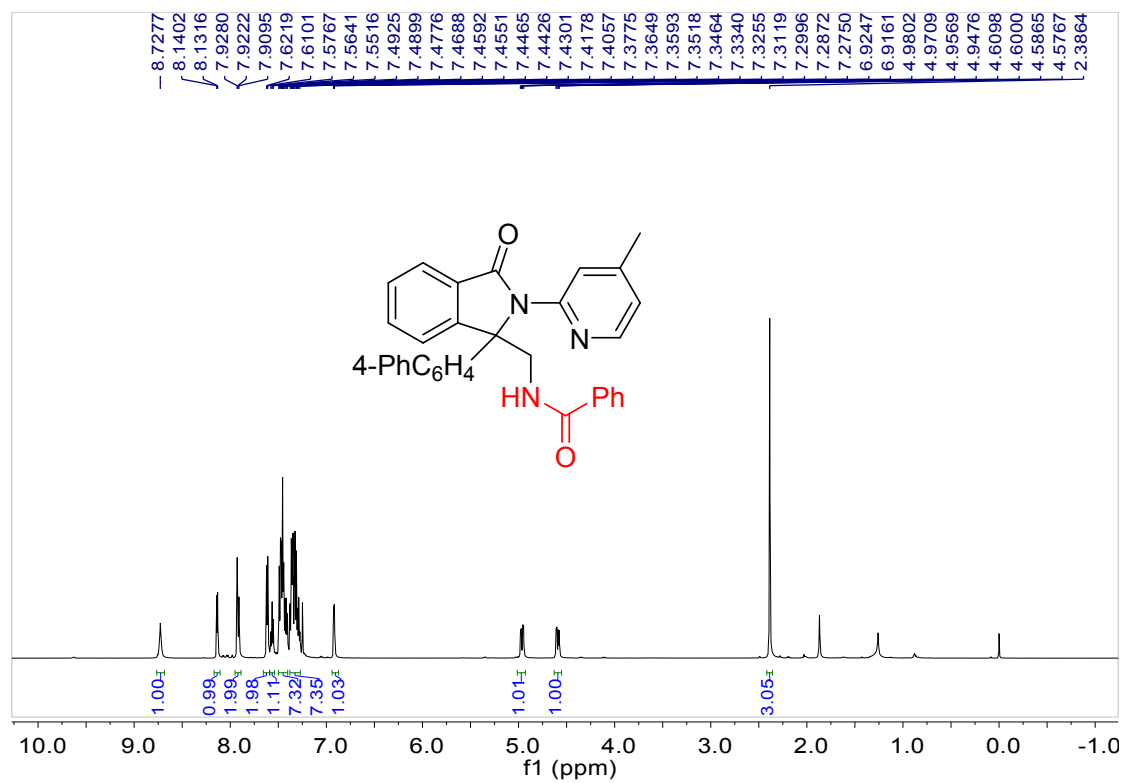

### <sup>13</sup>C NMR Spectra of Compound 4ea

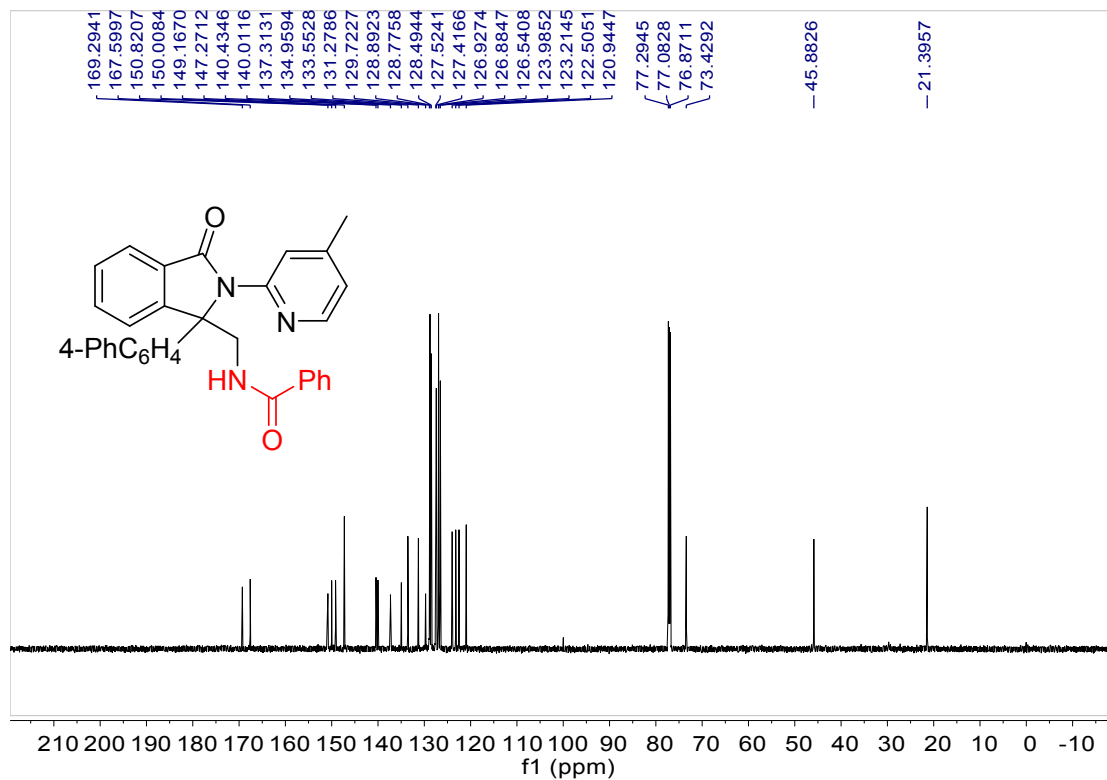

### <sup>1</sup>H NMR Spectra of Compound 4fa

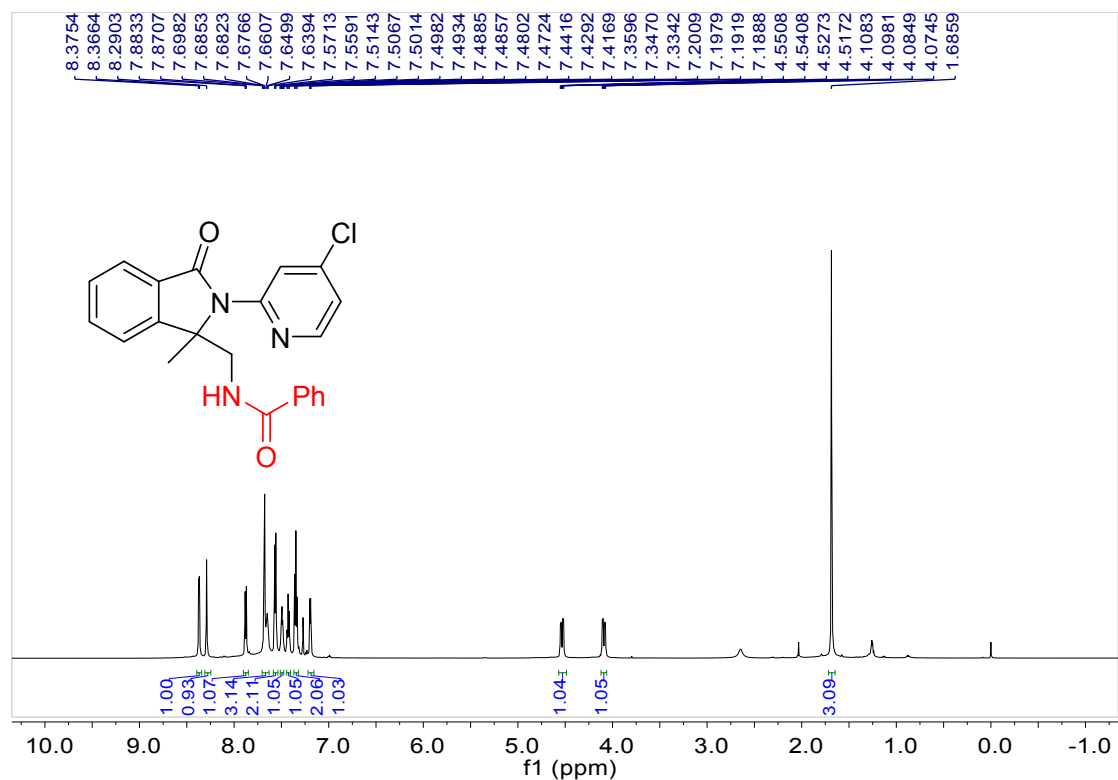

<sup>13</sup>C NMR Spectra of Compound 4fa

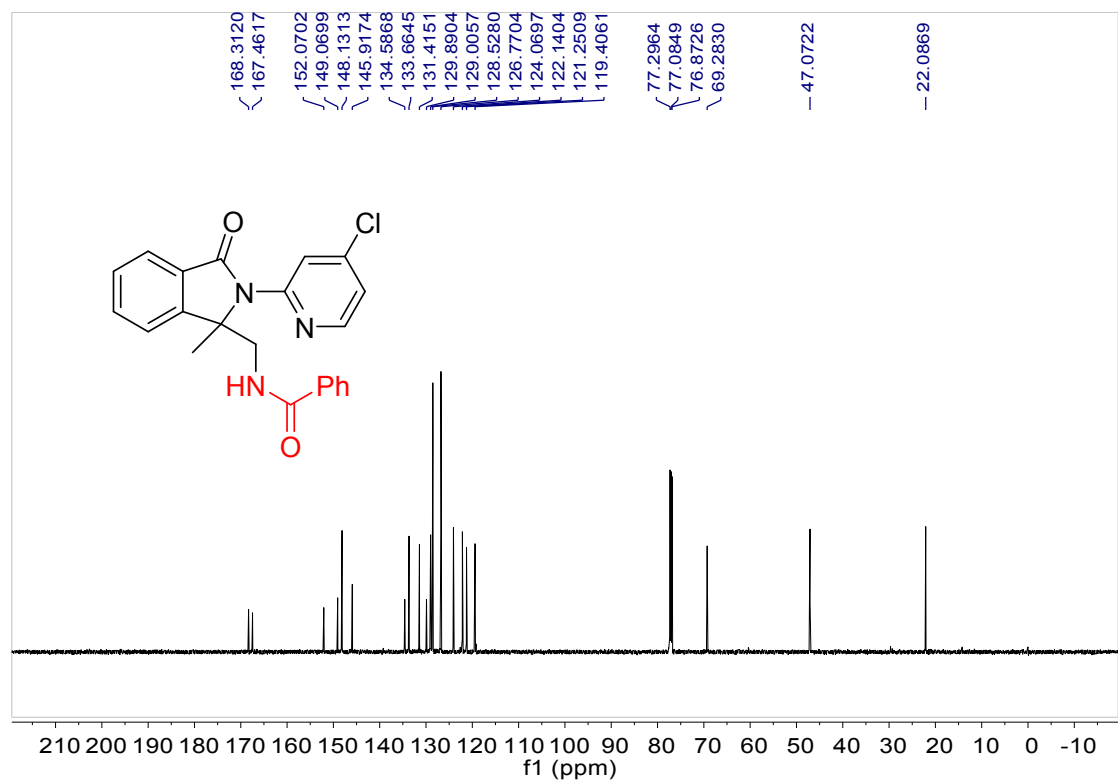

<sup>1</sup>H NMR Spectra of Compound 4ga

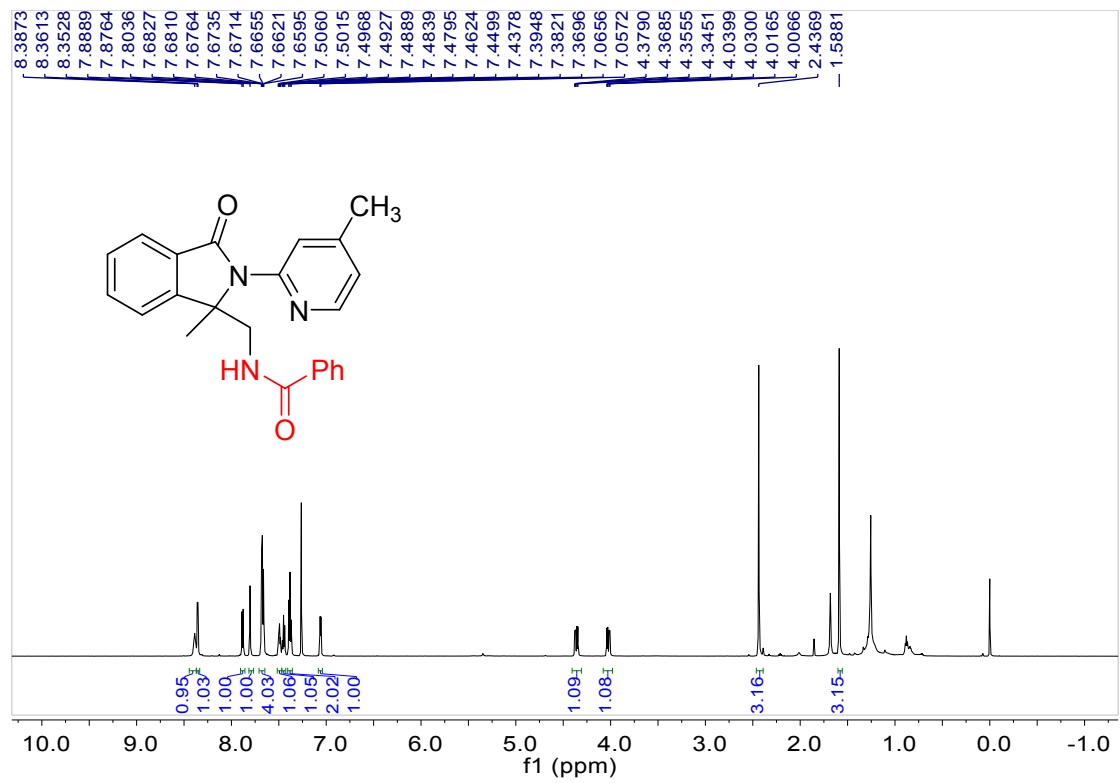

<sup>13</sup>C NMR Spectra of Compound 4ga

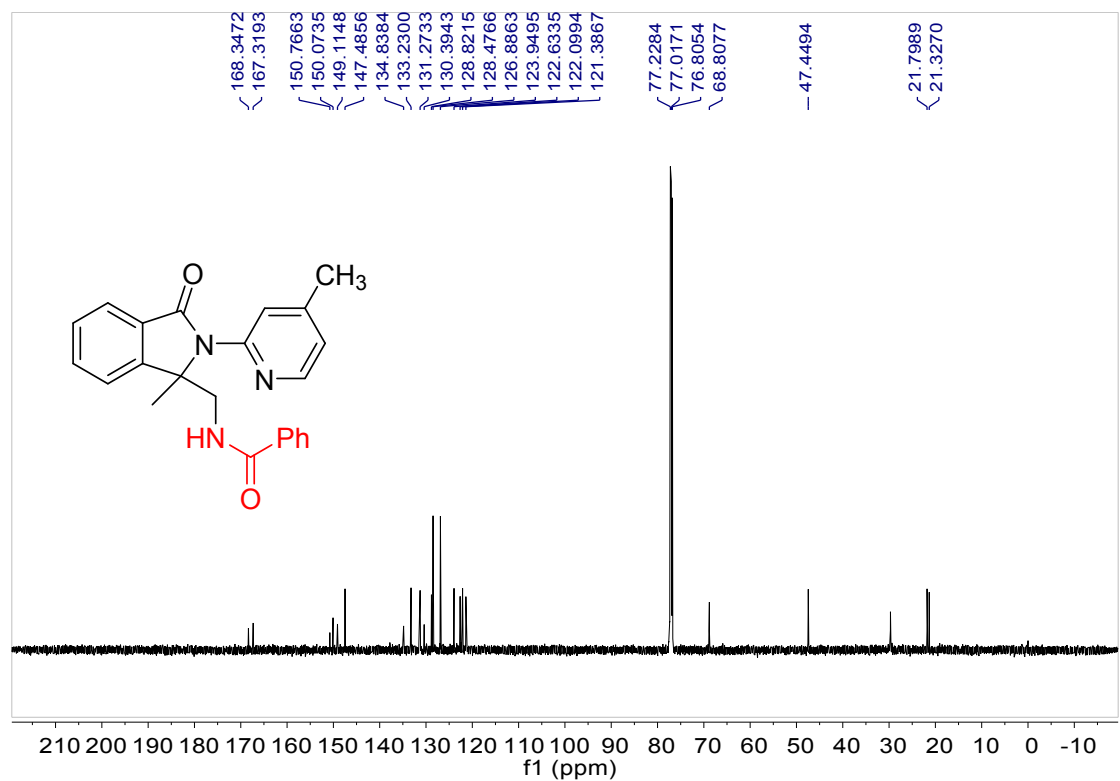

<sup>1</sup>H NMR Spectra of Compound 4ha

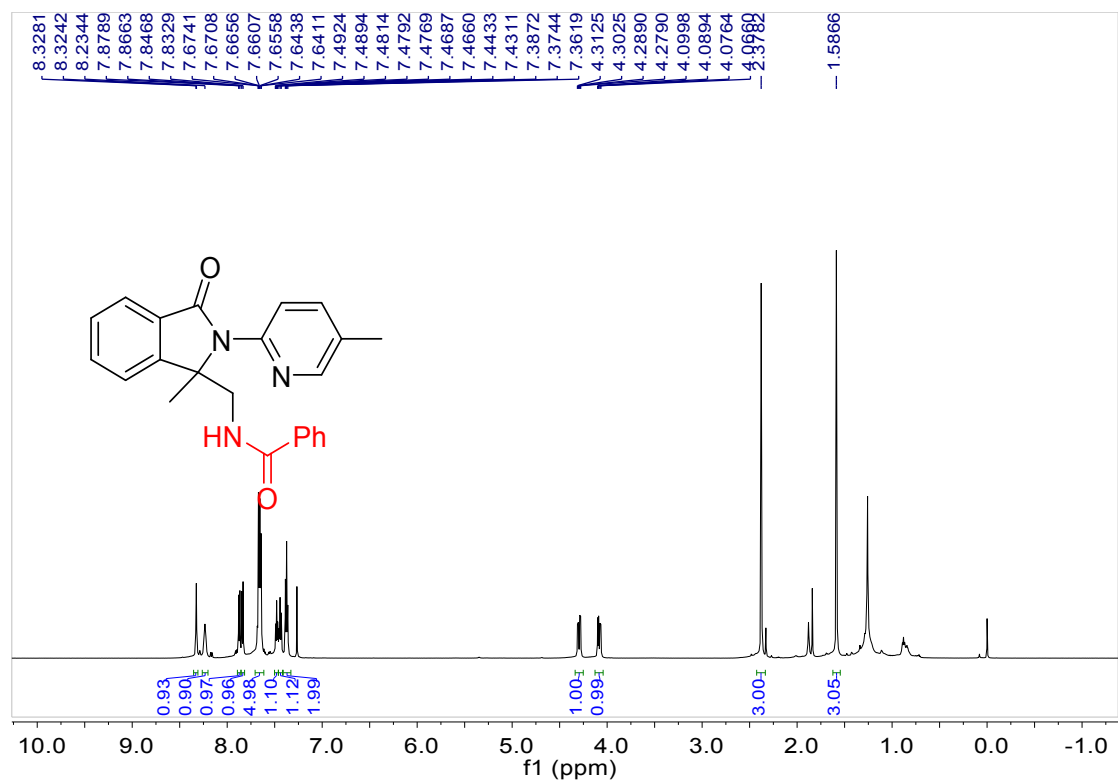

<sup>13</sup>C NMR Spectra of Compound 4ha

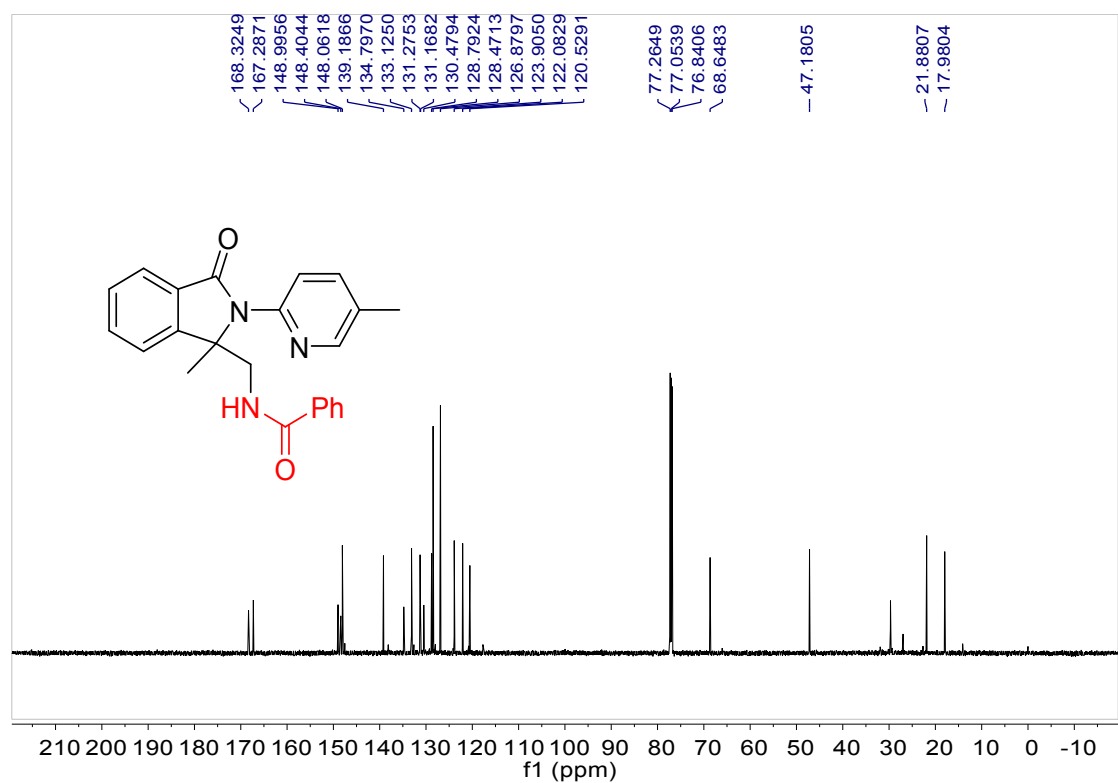

<sup>1</sup>H NMR Spectra of Compound 4ia

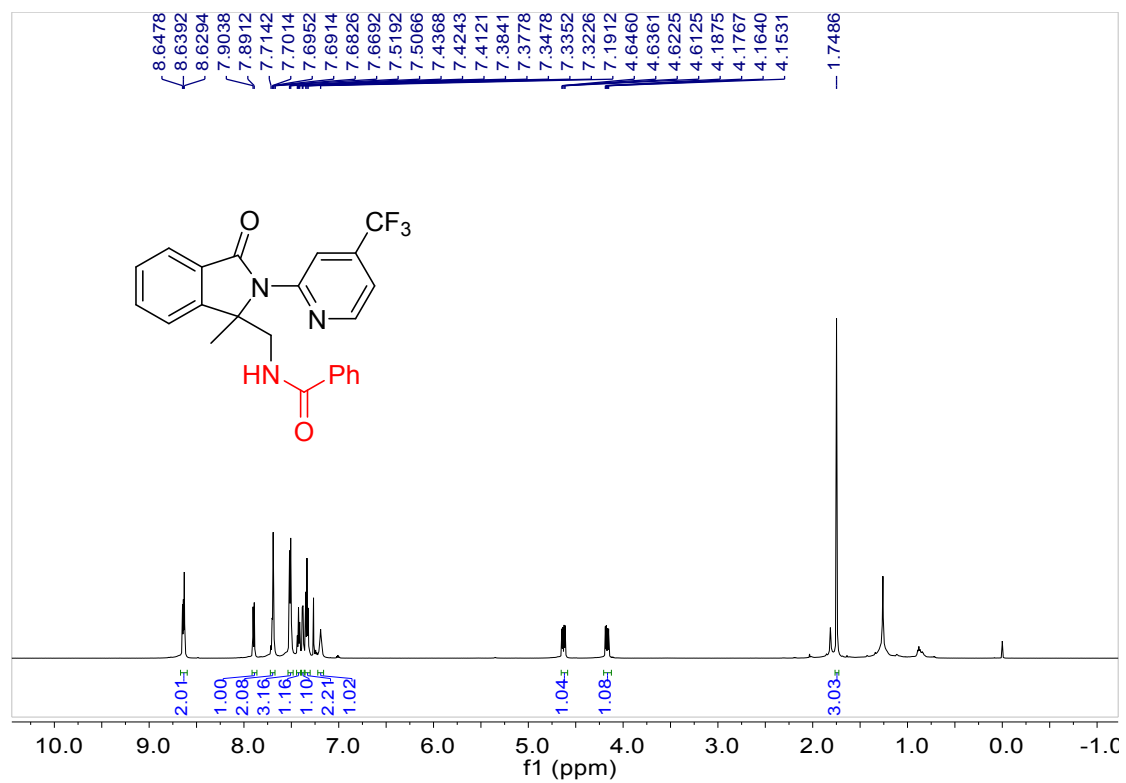

**<sup>13</sup>C NMR Spectra of Compound 4ia**

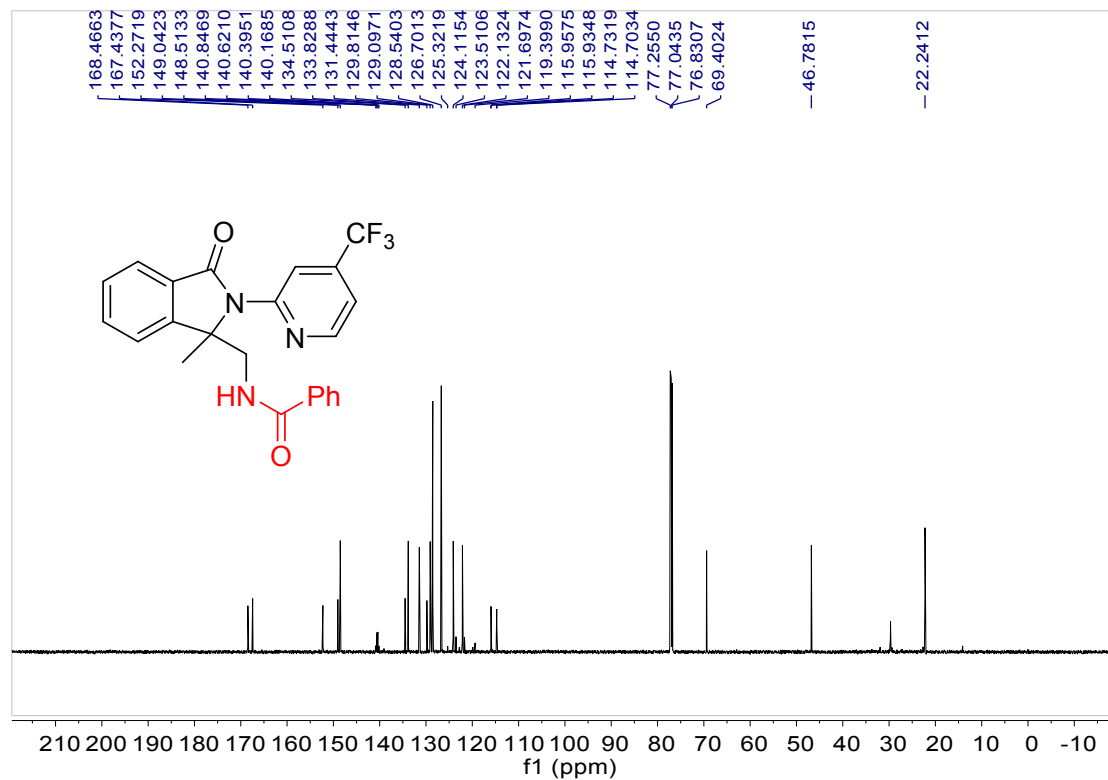

**<sup>1</sup>H NMR Spectra of Compound 4ja**

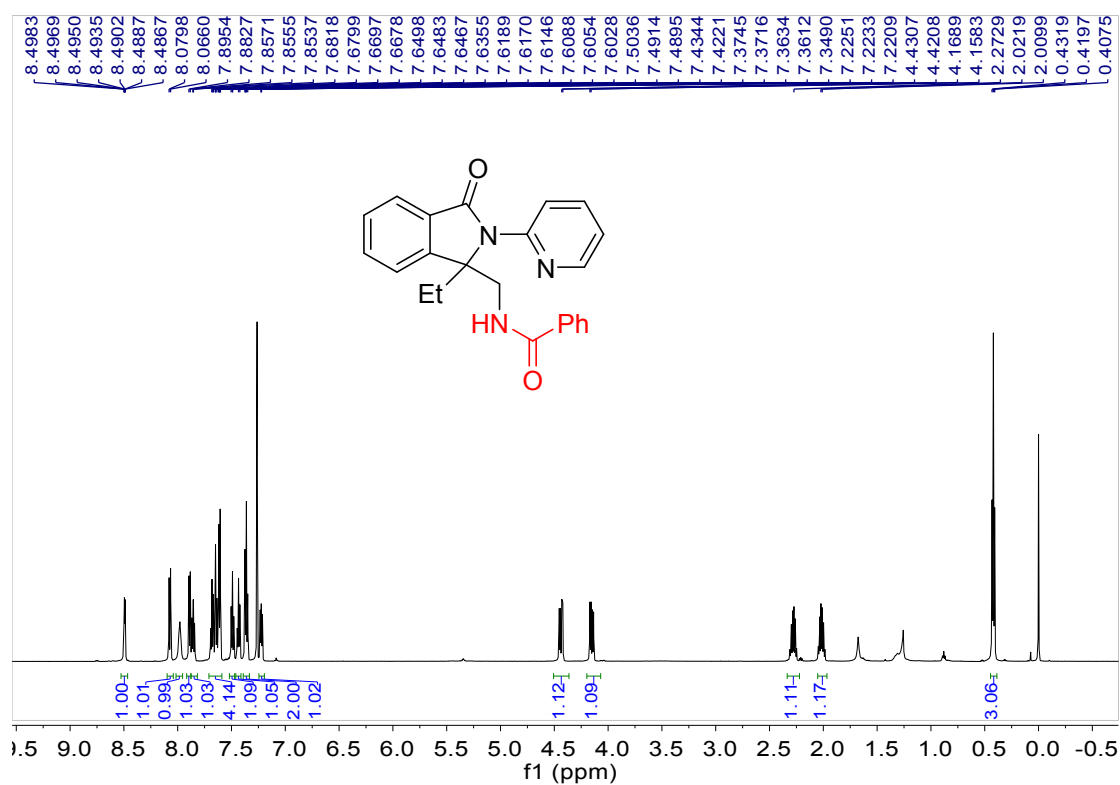

**<sup>13</sup>C NMR Spectra of Compound 4ja**

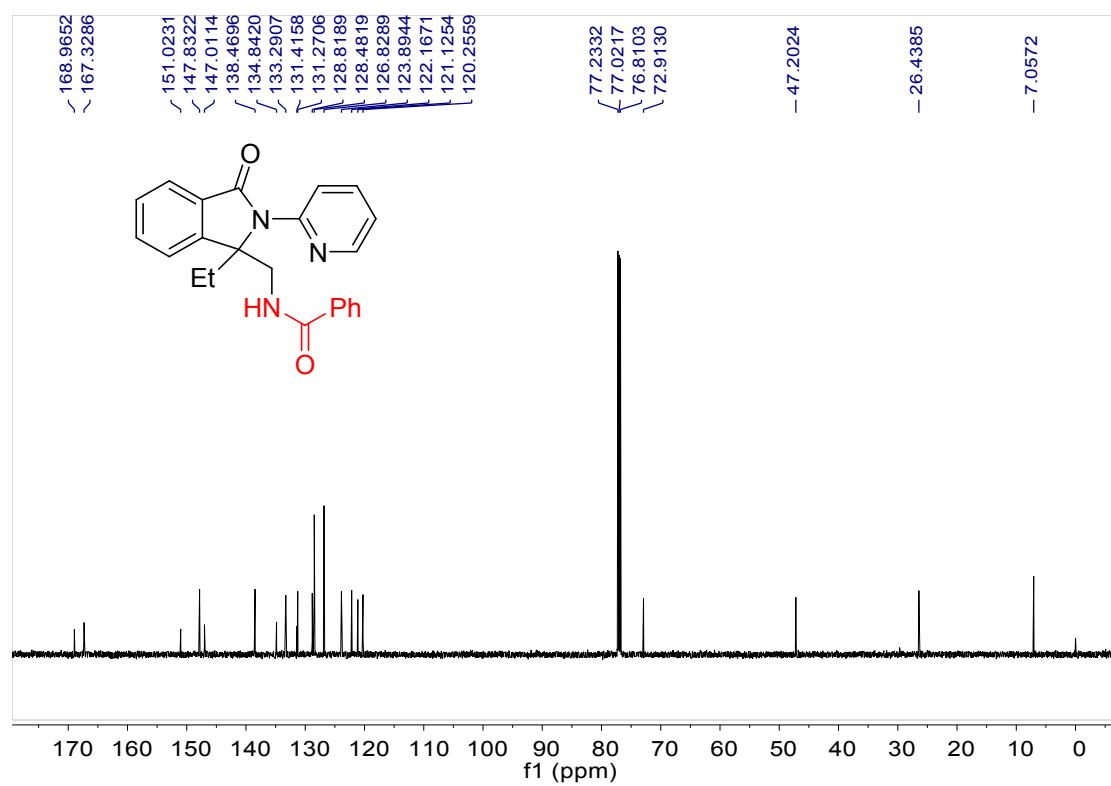

**<sup>1</sup>H NMR Spectra of Compound 4ka**

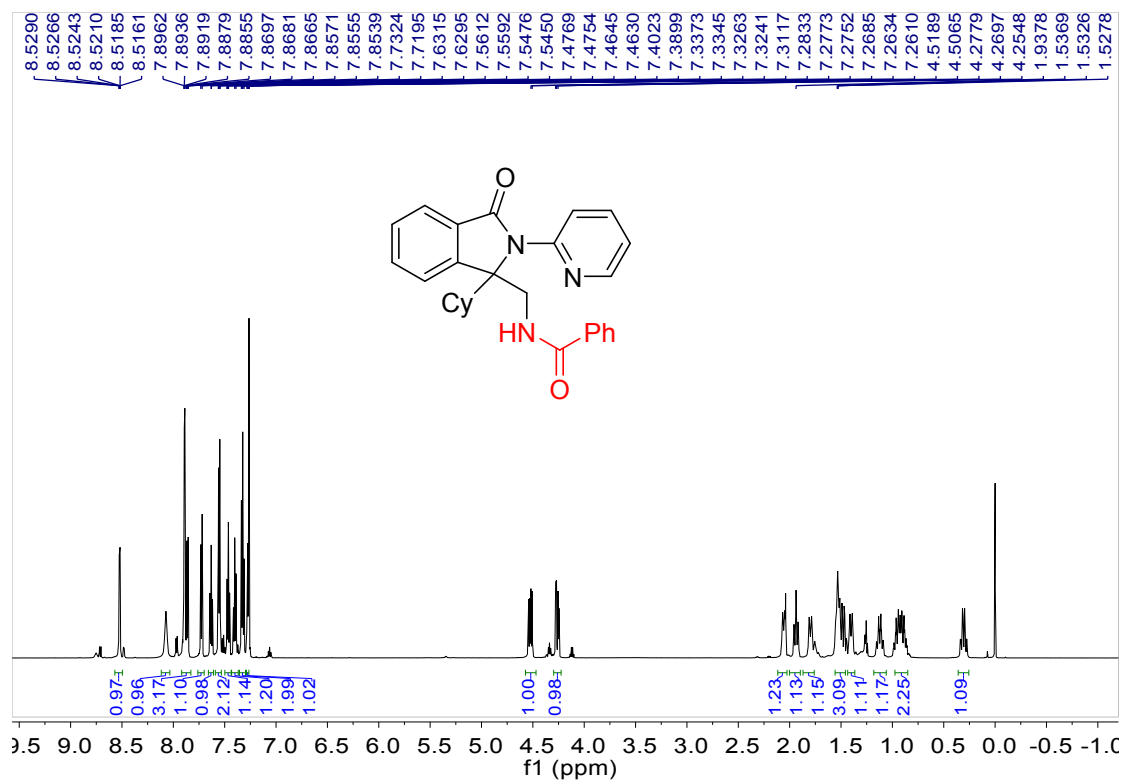

**<sup>13</sup>C NMR Spectra of Compound 4ka**

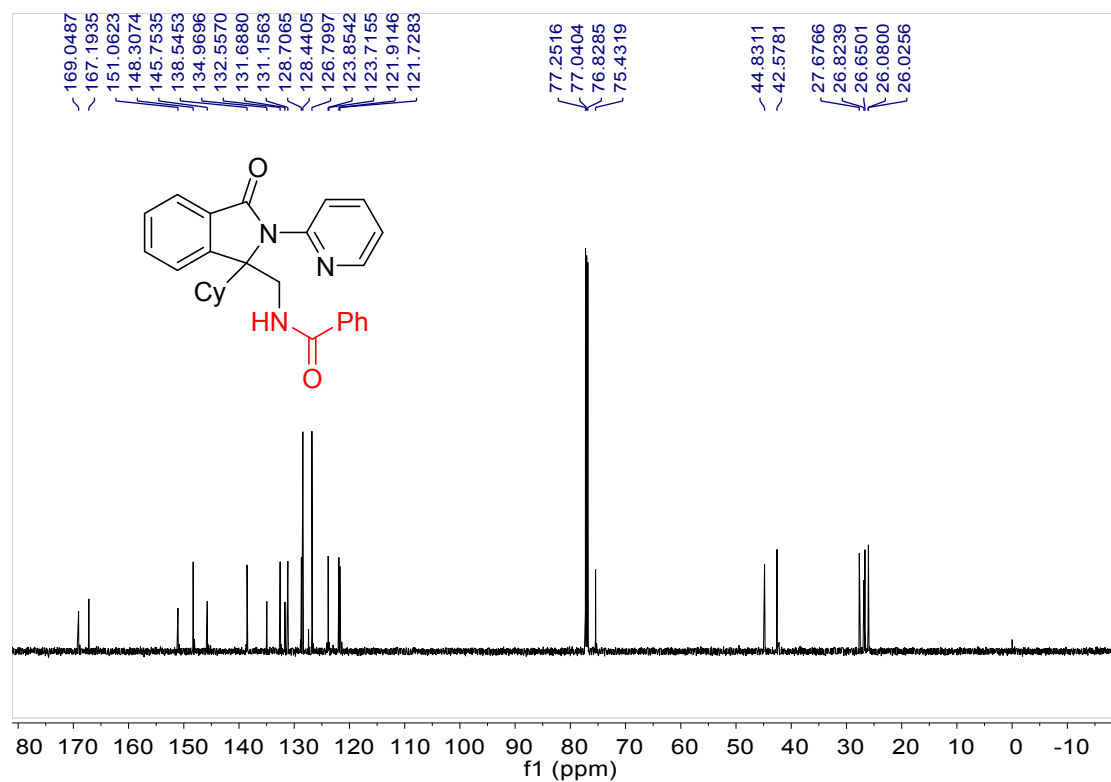

**<sup>1</sup>H NMR Spectra of Compound 4aa**

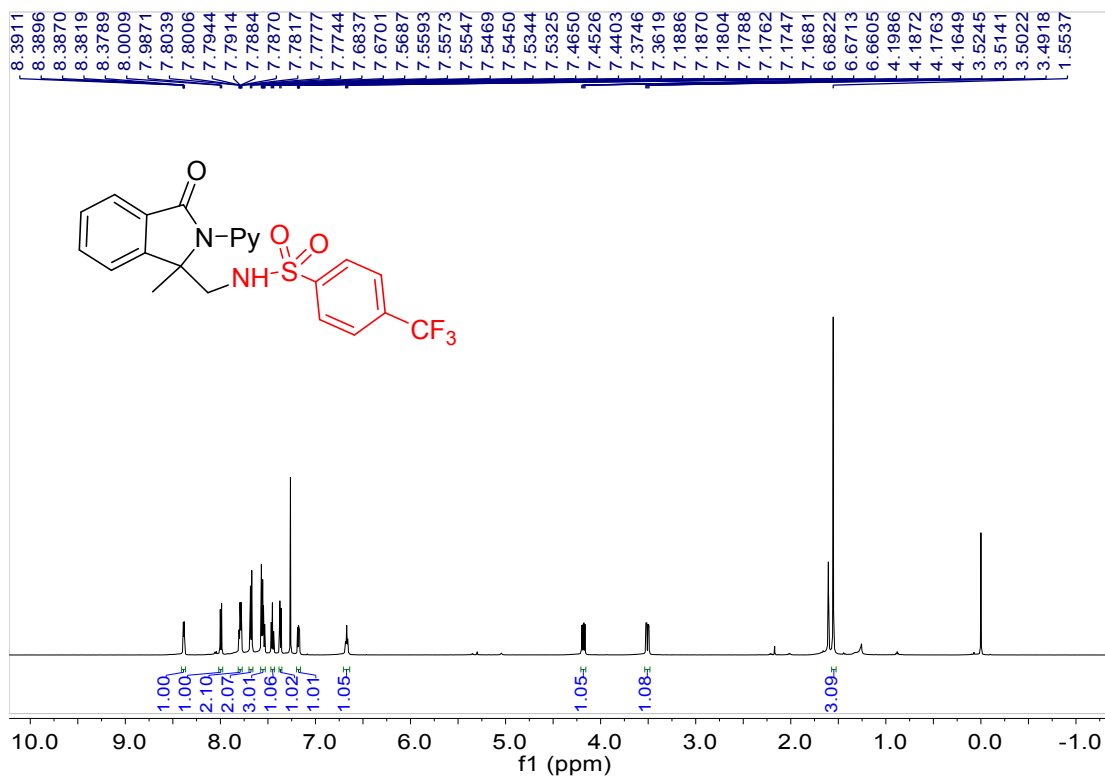

<sup>13</sup>C NMR Spectra of Compound 4aa

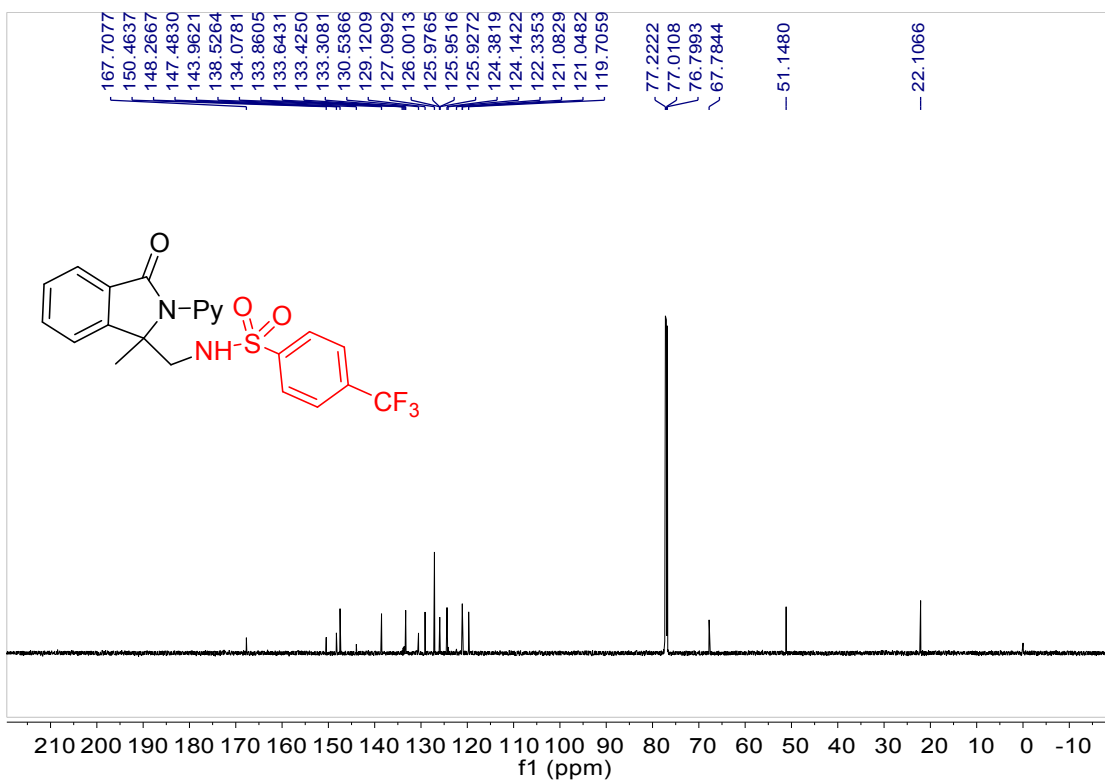

<sup>1</sup>H NMR Spectra of Compound 4ab



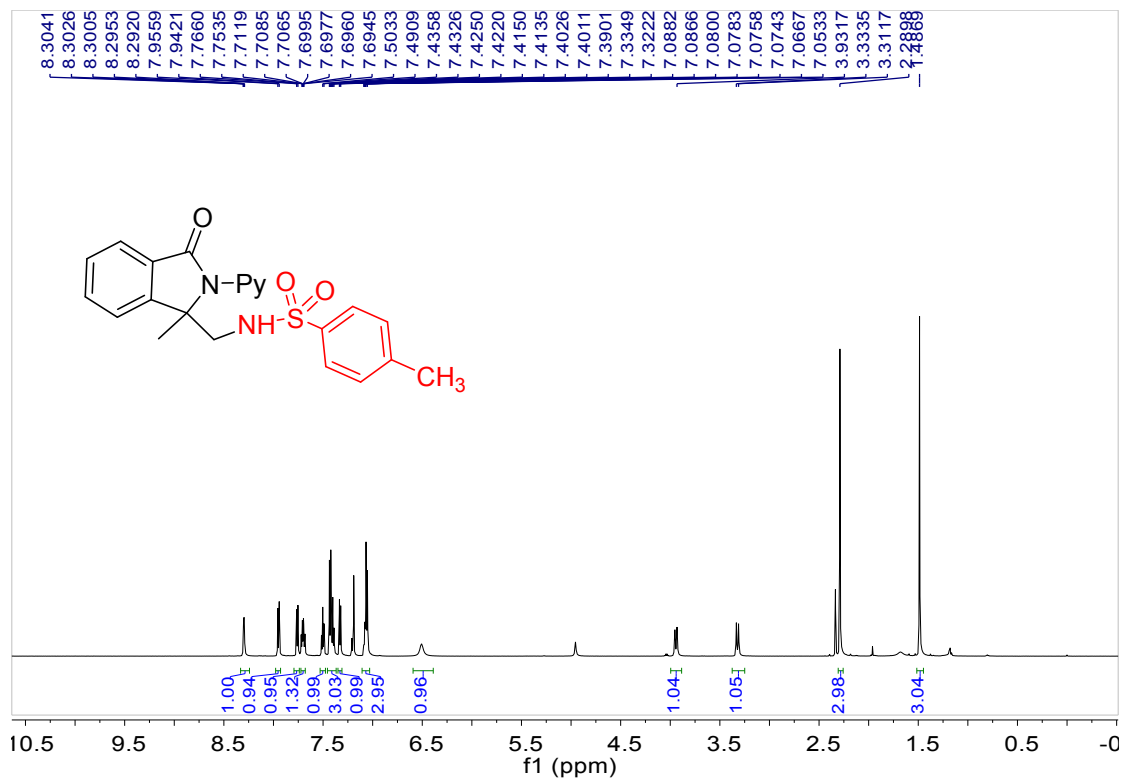

<sup>13</sup>C NMR Spectra of Compound 4ab

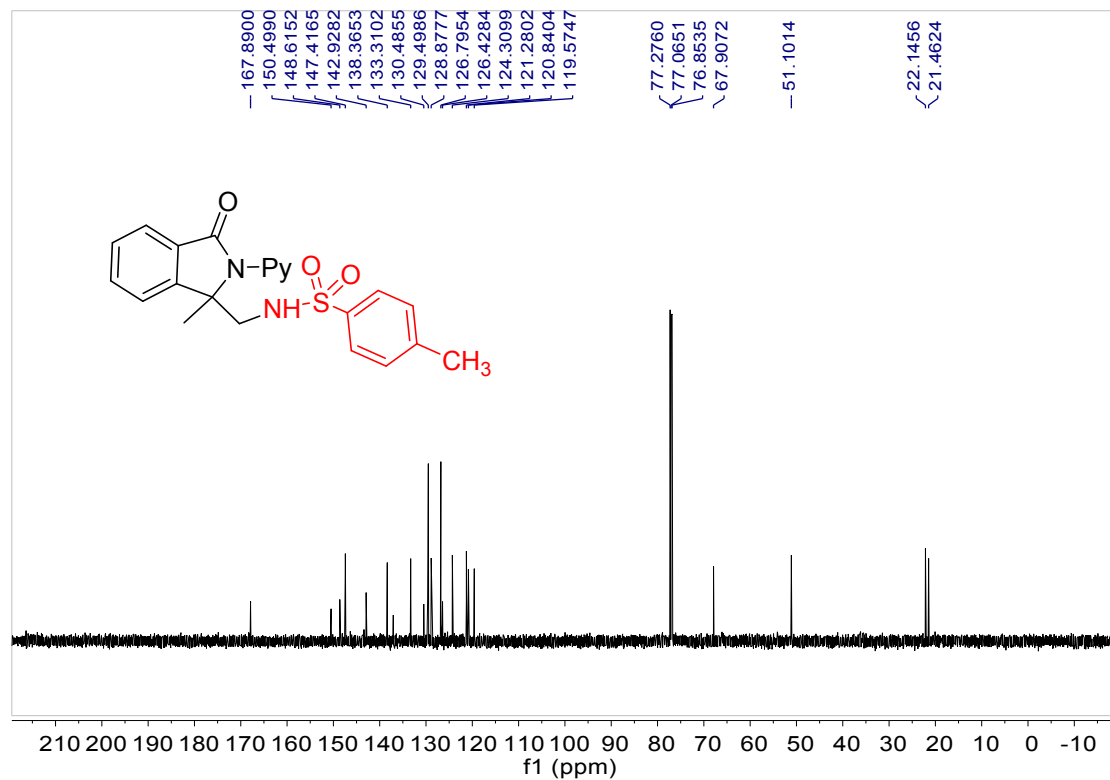

<sup>1</sup>H NMR Spectra of Compound 4ac

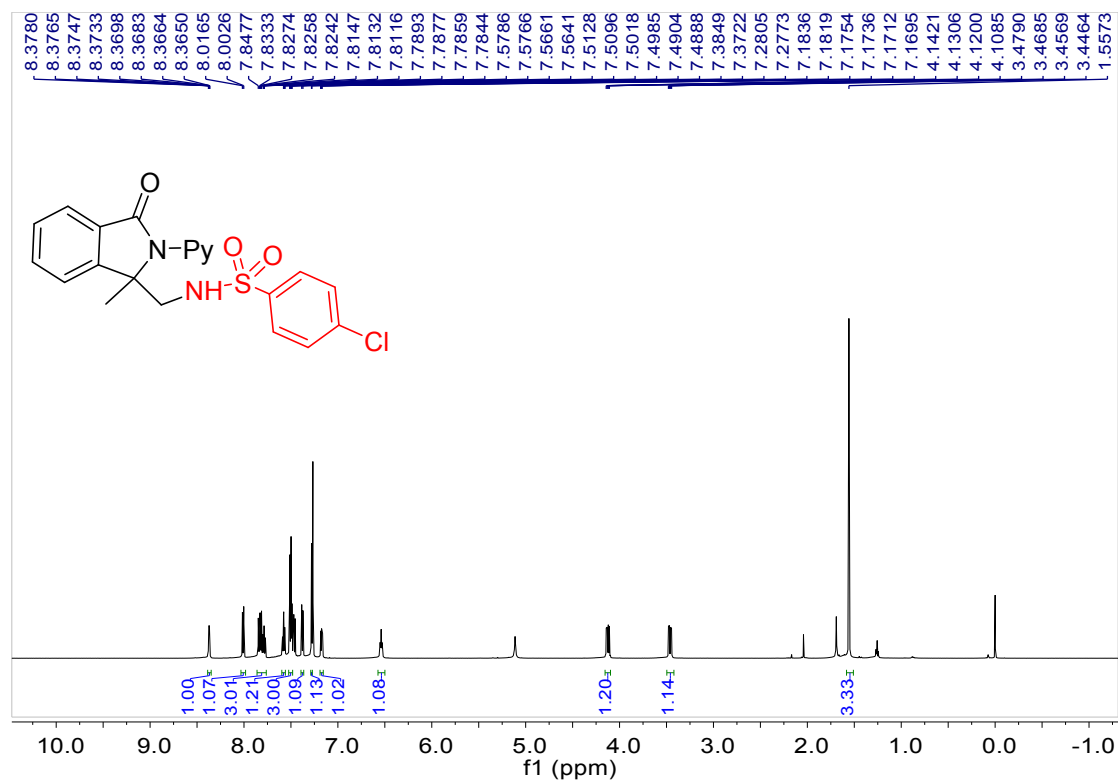

<sup>13</sup>C NMR Spectra of Compound 4ac

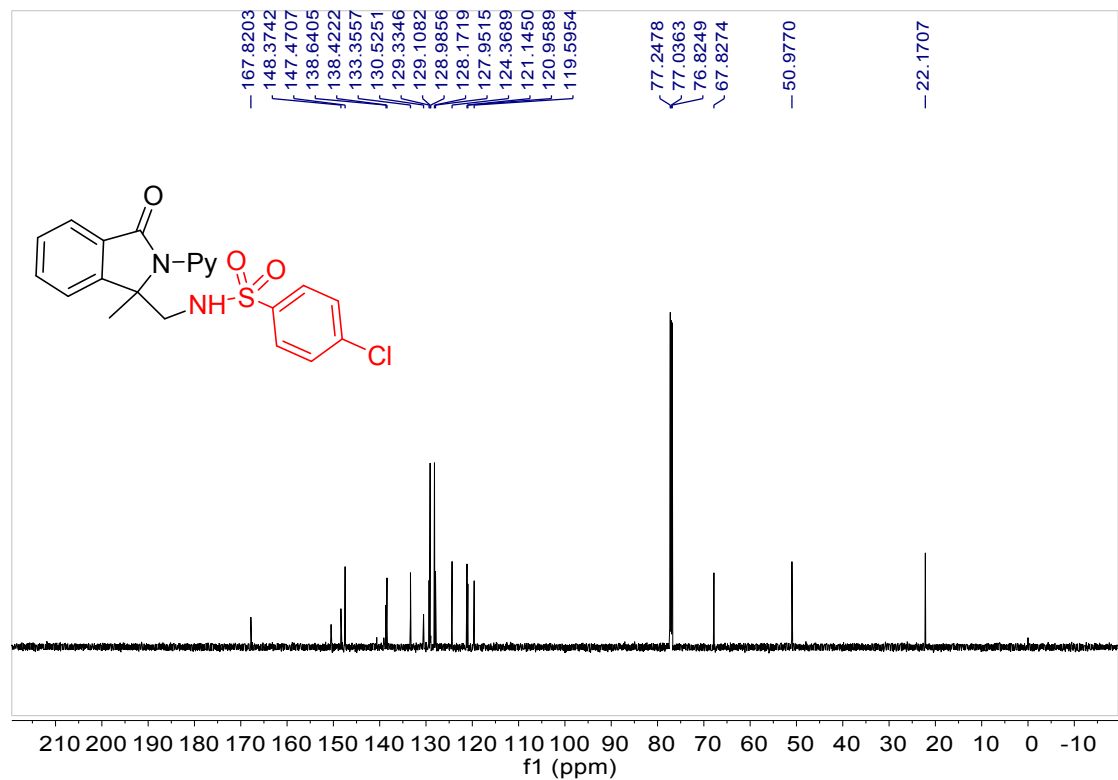

<sup>1</sup>H NMR Spectra of Compound 4ad

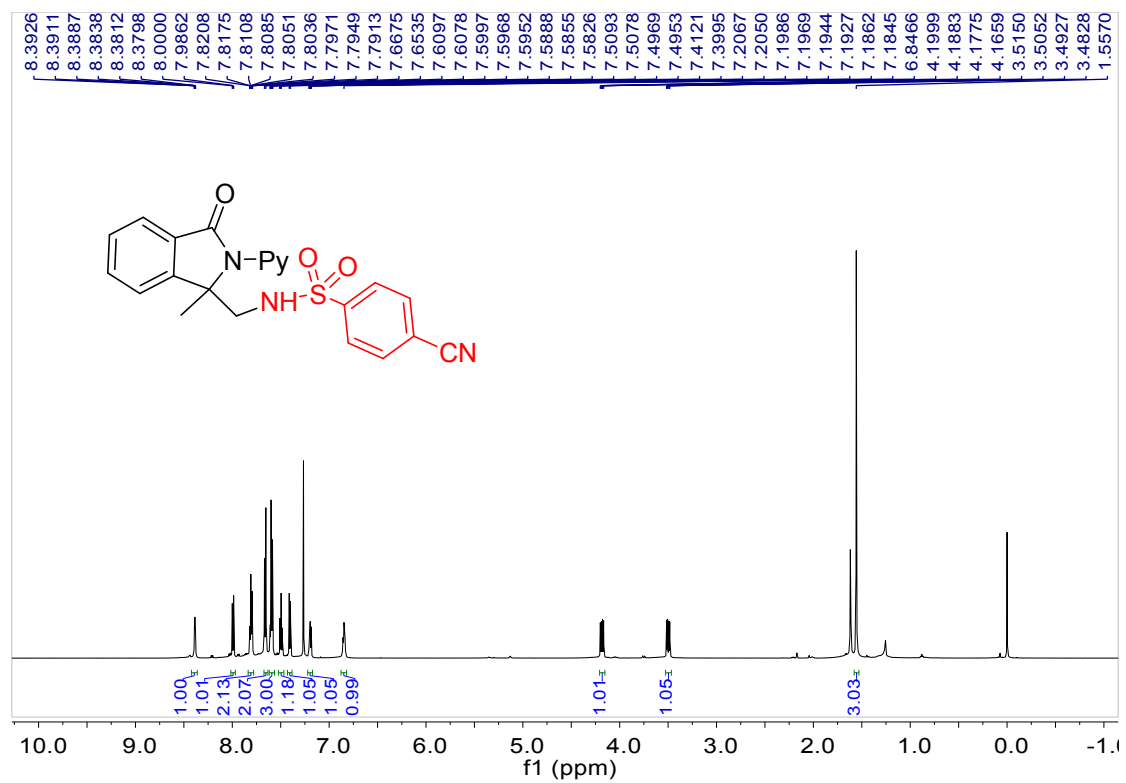

**<sup>13</sup>C NMR Spectra of Compound 4ad**

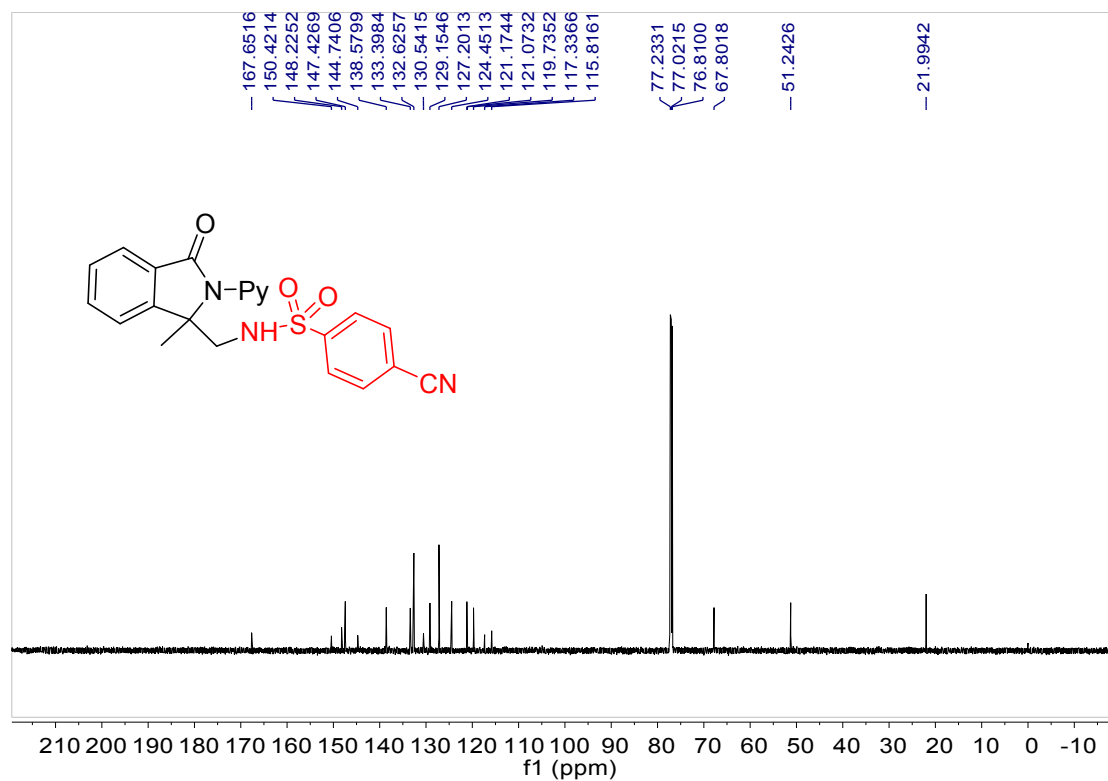

**<sup>1</sup>H NMR Spectra of Compound 4ae**

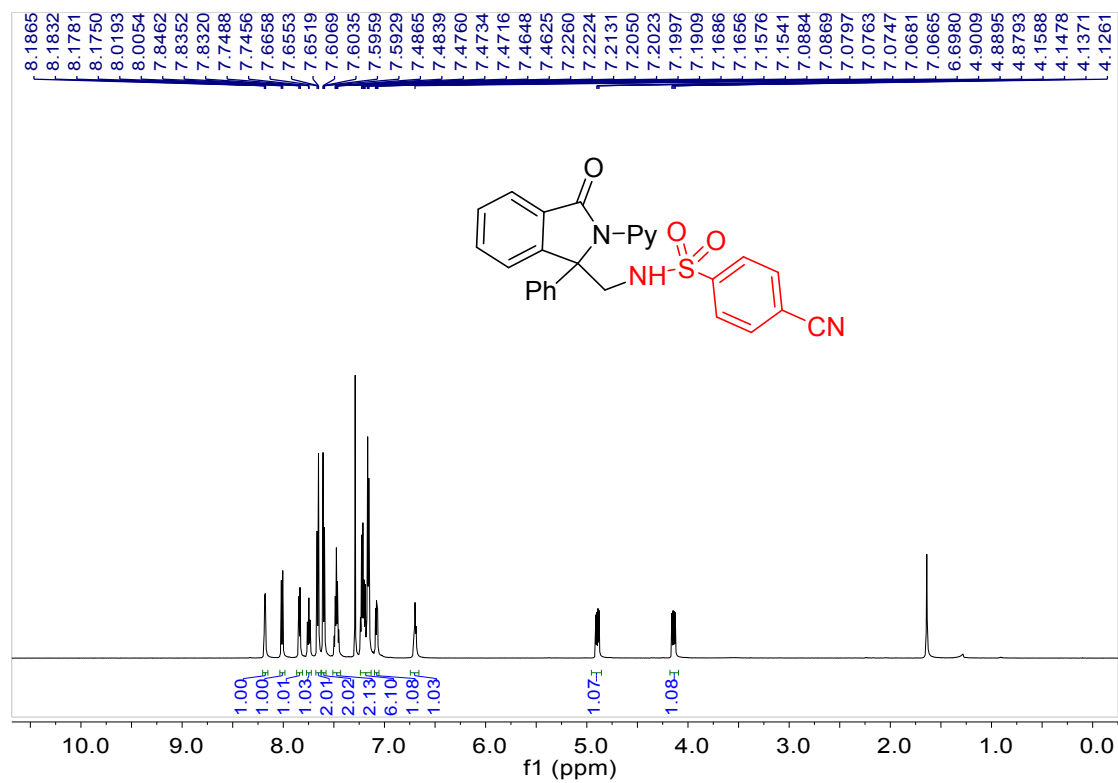

<sup>13</sup>C NMR Spectra of Compound 4ae

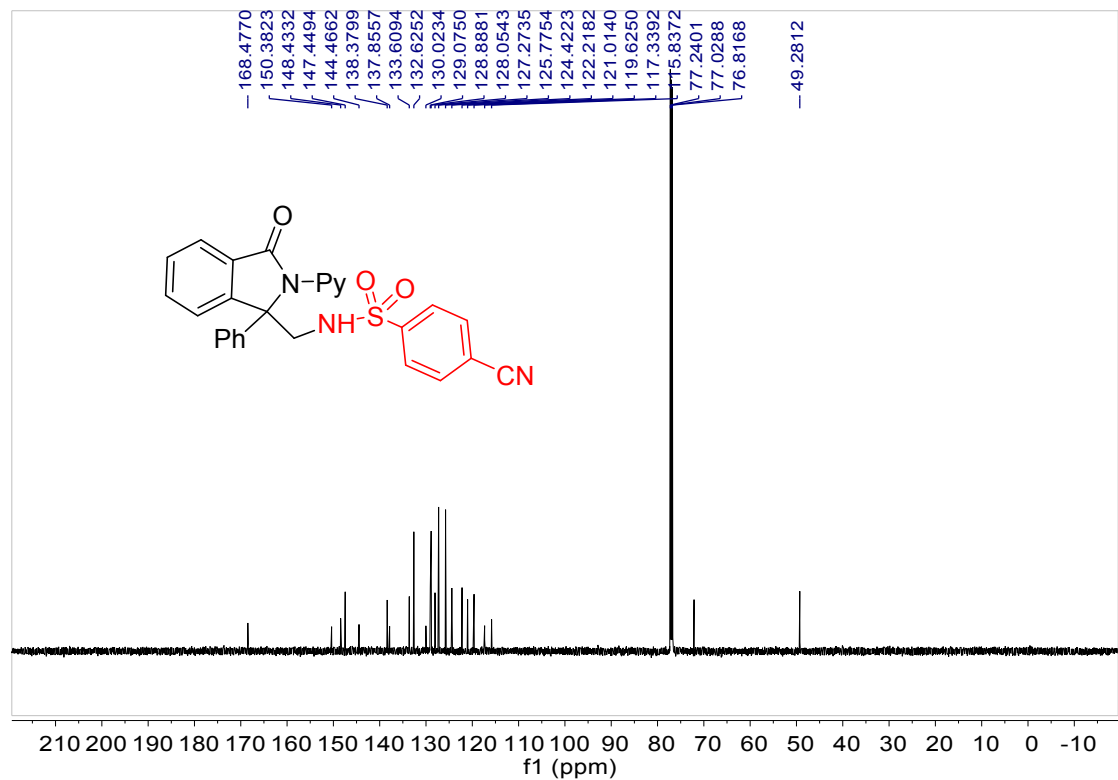

<sup>1</sup>H NMR Spectra of Compound 4af

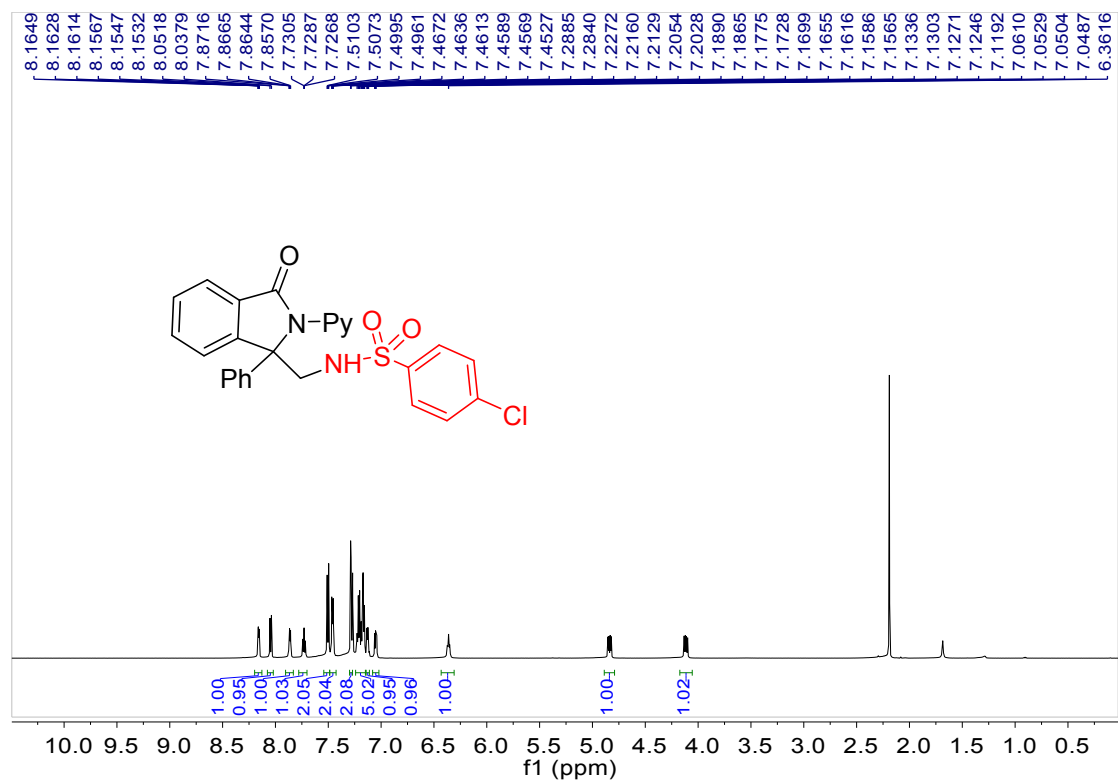

<sup>13</sup>C NMR Spectra of Compound **4af**

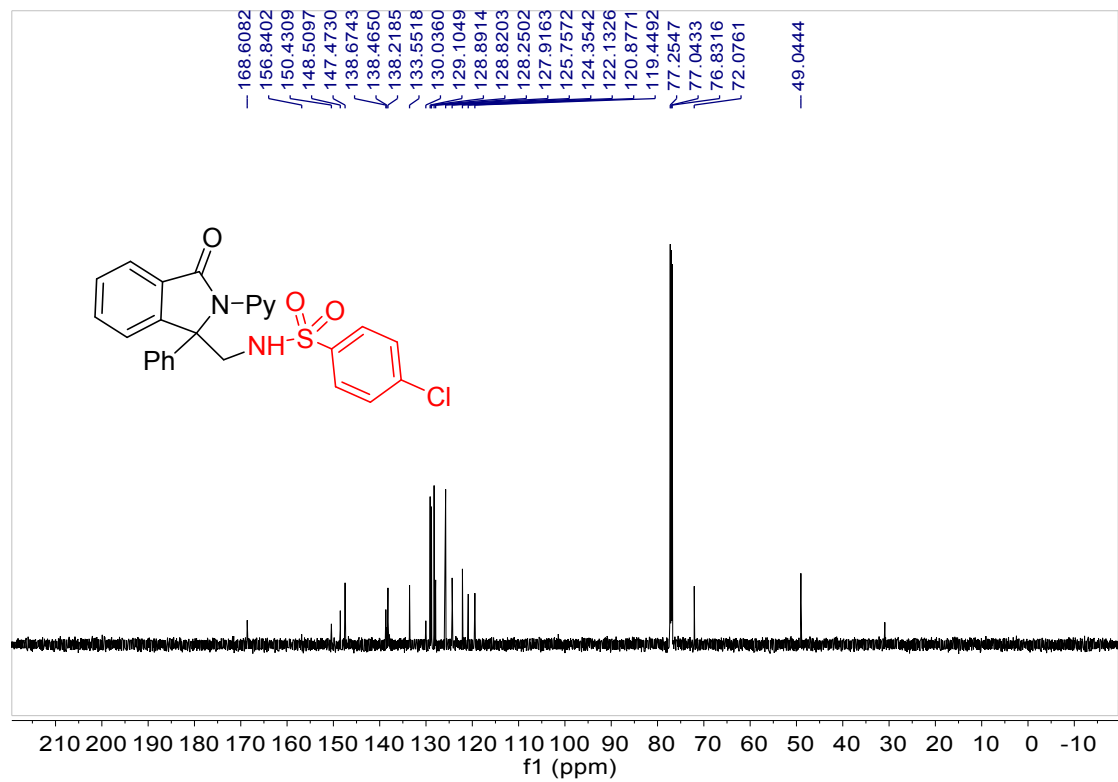

Supplement: d0cc00952k1.pdf [file d0cc00952k1.pdf]
